# Supplementary material for: Inferring language dispersal patterns with velocity field estimation
Source: Springer Nature journal article supplement (doi:10.1038/s41467-023-44430-5), 2024-01-02
Supplement: 41467_2023_44430_MOESM2_ESM.pdf [file 41467_2023_44430_MOESM2_ESM.pdf]

## Peer Review File

---

Inferring language dispersal patterns with velocity field estimation

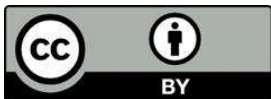

**Open Access** This file is licensed under a Creative Commons Attribution 4.0 International License, which permits use, sharing, adaptation, distribution and reproduction in any medium or format, as long as you give appropriate credit to the original author(s) and the source, provide a link to the Creative Commons license, and indicate if changes were made. In the cases where the authors are anonymous, such as is the case for the reports of anonymous peer reviewers, author attribution should be to 'Anonymous Referee' followed by a clear attribution to the source work. The images or other third party material in this file are included in the article's Creative Commons license, unless indicated otherwise in a credit line to the material. If material is not included in the article's Creative Commons license and your intended use is not permitted by statutory regulation or exceeds the permitted use, you will need to obtain permission directly from the copyright holder. To view a copy of this license, visit <http://creativecommons.org/licenses/by/4.0/>.

## Reviewers' Comments:

Reviewer #1:

Remarks to the Author:

The authors propose a vectorial framework to reconstruct the spatial dispersal of four language families around the world. The authors use a very wide range of methods that are borrowed from data science, physics and others from linguistics. I do not have the expertise to cover all of these methods, however the authors could help the reader understand if these methods are clustering algorithms, prediction methods, accuracy tests, etc. Some methods are called in the main text without further description, while some others are wrongly described, e.g. PCA is described in the main text as a similarity or clustering algorithm, actually PCA helps filtering out the least important features in order to describe a target variable in a space defined by superposition of few important features.

The methods section is a repetition of the vague description of the tools made in the main text and no further information is provided. The reader needs to get to Supplementary Information #3 to finally get a technical description of the methods that should actually appear in the Methods section.

However, here the technical details are not clearly expressed and the physical meaning of the vector is unclear. Due to this, all the following results are unclear.

The text is hard to read, mostly due the presence of many typos and other grammar issues. Long sentences are used for speculative purposes, while key methodological descriptions are narrowed down to few vague sentences.

I realize that the authors did a very hard work and that the storytelling is not easy to unroll in a linear way. Still, I feel that the authors should make an effort to simplify, correct and make the text clearer in order to be readable by an interdisciplinary audience.

Here is a list of concerns:

- typo in the abstract, the sentence "And its effectiveness and robustness have been carefully verified by both simulated and empirical validations" starts with "and".
- line 87: again the sentence starts with "and"
- "And such relatedness could vary with time when languages continuously dispersal into new regions." sentence starts with "and" + dispersal is a noun, the verb is disperse. The same is repeated in many other sentences, please correct.
- line 106: "The Principal Component Analysis (PCA) is implemented to exhibit the linguistic relatedness of present languages." it is not clear on what variables the PCA is implemented. PCA identifies the most important variables to explain the variance of a target variable (in this case, I guess, the target variable is the languages relatedness?). Clustering classification is a forthcoming step.
- subsection "Simulated validations for language velocity field estimation". I really struggle here to understand what data did the authors use to validate their results. The dataset that is supposedly used as ground truth is also simulated by a phylogeographic algorithm. The authors claimed in the introduction that this method only captures vertical dependency of languages and not horizontal contacts and borrowings. I am confused about what is the contribution of this validation. Maybe the authors could add this discussion in the limitations of the study.
- I would avoid the usage of the word "true", unless there are striking evidences of the coordinates of the language dispersal origin.
- what is the delta score of tree-likeness?
- the authors do not describe the data they used accurately. For instance, what is a trait? What is a cognate? It is never stated.
- "Third, the changes in the state frequencies of linguistic traits are proportional to their sociolinguistic prestige in a certain area.". I don't get the logic of this sentence. What is the meaning of prestige here? The definition of prestige is expressed only in the next paragraph, it should be introduced before going into interpretations.
- "It is noted that the larger length of the velocity vector of a language denotes the more rapid change of this language during its evolution". The reader is provided with no tools to understand this

sentence. A schematic representation of a vector could really help. E.g. what are the elements of a vector?

- Does the PCA find only two components, or the authors found that more components did not lead to more variance explainability? Again, PCA here is presented as a tool to find similarities among datapoints, actually it is a rearrangements of the predictors of the model that tells what are the most important features in the model. The authors say nothing about all this. Projecting the points in to the PC space allows to visualize clusters, but actual clustering is performed by other tools, such as k-nearest-neighbors.

- it is not clear how the vectors are formed in the PC space. Up to my understanding the PCA describes the datapoint with two components, hence I expect to observe a single point with coordinates (PC1,PC2) in the PC space. By the way, we cannot build a vector with one point. I understand from SI-3 that the vectors are computed as the difference in the PC space of  $X(0) - X(-m)$ , where  $t=0$  represents now and  $t=-m$  represents a moment in the past. What is this moment in the past? Then I read "Therefore, VI describes the change of the state frequencies of language I in a unit of time.". what is the unit of time? Years, centuries?

- what is the delta score and how is it computed? It is never stated in the text, nor in the SI

- Later on I read "In this study, we set  $m = 1$ .", but no reason is given, nor the unit of time is stated. One year? One century? Again, this is very opaque. I do not understand the physical meaning of this vectorial framework because no clear explanation is provided.

- the authors said that they study the spatial dispersal of languages along 10,000 years, to my understanding the vector field describes the change of the language between one exact moment of the past and  $t=0$ , which is supposed to be today.

Reviewer #2:

Remarks to the Author:

As I stated in my previous reviews of this paper, it is interesting, convincing, and historically significant in its conclusions. I am pleased to see that the authors have cut down the paper to deal with the four clearest examples, these being Indo-European, Sino-Tibetan, Bantu, and Arawak. The more troublesome Austroasiatic, Japonic and Oceanic examples have been removed, and I think this decision has added greatly to the clarity of the paper. It deserves to be published in Nature Communications.

My first comment is that the paper still needs a light level of English editing. I do not have time to do this on behalf of the authors, but perhaps I can use the abstract as an example of how some light editing might increase its clarity:

Here is the original abstract:

Reconstructing the spatial evolution of worldwide languages could shed light on understanding the global demic diffusions and cultural spreads. The phylogeographic approaches have been frequently used to infer the dispersal patterns of languages. However, they have shown some limitations primarily because the phylogenetic tree cannot properly capture the complex socio-cultural scenarios like contact-induced borrowings and areal diffusions of languages. Here, we introduced the language velocity field, which could be estimated directly from linguistic data without phylogenetic reconstruction, to enable the inference of the dispersal routes and centers of language families and groups in the geographic space. And its effectiveness and robustness have been carefully verified by both simulated and empirical validations. With the language velocity field estimation, we made inferences on the dispersal patterns of four language families and groups worldwide including around 700 languages. Our results showed that the dispersal routes of these languages were primarily compatible with the population activities inferred from ancient DNA and archaeological materials, and their dispersal centers were geographically proximate to the ancient homelands of agricultural or Neolithic cultures. Our findings highlight that the agricultural languages

dispersed along with demic diffusions and cultural spreads globally in the past 10,000 years. We expect that language velocity field estimation could greatly aid the spatial analysis of language evolution, and many more studies of demographic and cultural dynamics.

And here is how I would edit it:

Reconstructing the spatial evolution of languages worldwide can shed light on understanding global demic diffusions and cultural spreads. The phylogeographic approaches that have been frequently used to infer the dispersal patterns of languages show limitations, primarily because a phylogenetic tree cannot properly capture complex socio-cultural scenarios that involved contact-induced borrowing and areal diffusion of languages. Here, we introduce the language velocity field, which can be estimated directly from linguistic data without phylogenetic reconstruction, as a resource that can enable the inference of the dispersal routes and centers of language families and groups in geographic space. Its effectiveness and robustness have been carefully verified by both simulated and empirical validations. Using language velocity field estimations, we infer the dispersal patterns of four language families and groups worldwide, covering around 700 languages. Our results show that the dispersal routes of these languages were primarily compatible with human population spreads inferred from ancient DNA and archaeological materials, and their dispersal centers were geographically proximate to ancient homelands of agricultural (or Neolithic) cultures. Our findings highlight that agricultural languages dispersed with demic diffusions and cultural spreads on a global scale during the past 10,000 years. We expect that language velocity field estimation will aid greatly the spatial analysis of language evolution, with implications for studies of demographic and cultural dynamics.

Back to my commentary:

Figure 2 shows the proposed agricultural homeland in northern Amazonia for Arawak. This conflicts with text lines 184-186, where it is stated that " In addition, the language velocity field posited the dispersal of Arawak languages originated from the border of Peru, Brazil, and Bolivia in Western Amazonia, which was geographically close to the known ancient agricultural homeland of South America in the Andes". This statement implies a homeland much further to the south than shown on the map, which is what the archaeology would suggest. The map shows an area too far north. I note in Supplementary Notes 1 Table S2 that the Arawak homeland is put in the northern lowlands of Bolivia (upper Madeira River), which is precisely where I would expect it to be!

Likewise, lines 187-189 state " Moreover, in the case of Sino-Tibetan languages, their dispersal center was inferred in the Gansu province of China (Figure 2b). It was approximate to the geographic ranges of the Yangshao (7,000-5,000 years BP) and/or Majiayao (5,500-4,000 years BP) Neolithic cultures, although it was far from the ancient agricultural homelands known in the Yangzi and Yellow River Basins of China." Surely, Yangshao and Majiayao were centrally located in the Yellow River homeland of millet and pig agriculture? I cannot understand what is meant here, although, of course, the Yangzi is a different matter.

The discussion from lines 197 to 298 is highly technical, and I have no observations on it. Much the same applies to the materials and methods section. I can understand from lines 301-9 that the basic data come from a geographical plotting of cognate presences and absences, but I was puzzled by the statement (lines 304-6) "Lexical cognates of these language samples in each language family or group were binary-coded traits..." This sentence seems to confuse the concepts of cognate and language. How many cognate terms were used in the analysis, and from which proto-language levels were these cognates derived? In other words, how was a cognate defined? This might be explained in the supplementary data, but I think it should be clearer here in the main text.

Lines 449-40 state: "The diversity approach is an alternative phylogenetic tree-free approach and simply infers the location of the language homeland to the areas with the highest linguistic diversity." What is meant here by linguistic diversity? Does it relate to relative times of splitting from an inferred

phylogenetic family tree? (i.e., deeper-splitting subgroups are older)? I presume it is not simply related to number of languages.

I noticed in Supplementary Note 1 that phylogenetic discussions of Austroasiatic, Japonic and Oceanic are still mentioned, even through these groupings are no longer discussed in the main text.

Supplementary Notes 2: it is not clear to me that Supplementary sections 2 and 3 are really necessary (The interdisciplinary alignment of Genetics, Archaeology, and Linguistics; The Age-Area Hypothesis for inferring the language homeland). I think the observations made in this paper can stand quite well without them.

Peter Bellwood

Reviewer #3:

Remarks to the Author:

I find this study generally quite interesting, since the authors claim that they have developed a new method that allows to represent historical dynamics of individual languages in comparison with neighboring languages by multidimensional vectors, which can then be projected in lower-dimensional space in order to even infer the original locations from which the language family as a whole dispersed.

While interesting, I see some general problems with the study, mainly its fit with the journal where it was submitted to, and as a result, I recommend it to be rejected -- not because it is too low in quality, but rather because it is not a good fit with the journal, as I'll explain below.

Apart from this, I see some major and minor flaws, which I'll discuss below.

First, regarding the fit of the approach: What the authors propose is a methodological study, a new methodology of which they claim it outperforms established -- albeit controversial -- methods. In such a case, the journal where they submitted their study to, does not really qualify as a good fit, since we do not deal with new findings (they cannot be made until the method has been thoroughly evaluated) but rather with a new method that needs to be shown to work. For this reason, I think some journal like "Nature Methods" would be a much better fit here.

Second, if the authors accept that they need to convince us first that their method is useful and will enlarge our future knowledge about the spread of language families over time, they should please provide their method in a way that it can be replicated. As of now, we have a bunch of unrelated, badly documented R-scripts in a folder of 600 MB, that are hard to read and even harder to understand. Where is the vector estimation happening, what is the  $k$  you choose for the  $k$ -means languages that you select as neighbors, what is the impact of  $k$  on your results, etc. It makes me extremely nervous to see such a huge bunch of barely commented R-scripts that often do the same, but bear another name of another language family. This is definitely not how you make a new method successful. The least we would expect is a package in R with a tutorial that runs us through your code, for one language family, and then an extended tutorial with all four language families.

Third, speaking of four, I hate to say this, but I was reviewing this study before, not negatively, but pointing to the code, and to other issues. Interestingly, the number of language families has now dropped from 7 to 4. How the heck did that happen? How do the authors explain that they discard three language families now? I know having the same reviewers for the same paper across journals is annoying, but please, good scientific practice requires you to be transparent and tell us what happened here. Did you discard them, because they did not bring the results you hoped for?

Fourth, the claim of the method not using phylogenetic information is a bit exaggerated: we know geography correlates often with language relatedness (see for example here: <https://doi.org/10.1371/journal.pone.0265460>), so if geography explains the tree, you cannot say you do not use the tree if you use geography as a proxy for the construction of your vectors.

Fifth, the question of homeland has always been problematic, but if you already use data by Wichmann and Rama, you should also check the much simpler baseline published in Glottolog by now ([www.pyglottolog.readthedocs.io/en/latest/homelands.html#module-pyglottolog.homelands](http://www.pyglottolog.readthedocs.io/en/latest/homelands.html#module-pyglottolog.homelands)). This method seems to work as well as the one by Wichmann and Rama, but it is even simpler, so I would say there's one more baseline to be tested. And when speaking of testing: why restrict your study to four datasets (or seven), if there are many more available in terms of phylogenies now, which are all with nicely coded cognate sets in standardized data formats (see e.g., <https://doi.org/10.1038/s41597-022-01432-0> for a very large collection of standardized data)? It seems the data has been cherry-picked to yield good results. Taking ten of the datasets in the Lexibank collection should not be difficult and would tell us much more clearly where we are with this new method.

Sixth, the method has the rather infelicitous name "language velocity field estimation", and I could not find any explanation why the authors chose to call it like that, since the name is very confusion and difficult to parse, and it does not really help to understand what the method could be about. I think in general it would be useful to 1) change the name to something that explains the method in a better way (dynamic trait vectors? I am not sure) and 2) to explain the method in much, much more detail. For this, figures would be needed that show how vectors for some of the traits are estimated, and the authors would need to also check the resulting vectors on an individual basis in order to see if they make sense.

Seventh, the authors praise their method for not needing trees, but at the same time, they do not tell the readers why trees are so useful: they tell us various scenarios of character evolution in a very transparent way, in which we have scenario and can plot how the trait evolved. Of course, this is not always done, but they should tell the readers to which the method they propose allows us to get some insights into the black box, since a simple black box, even if it works, is not satisfying from a scientific viewpoint, and we talk about scientific approaches here.

Eighth, and final point, the paper is not nice to read, the authors should check their wordings, which are often hard to follow, at times with flaws in grammar, and it would really profit from a complete overhaul and a thorough checking by a proof reader.

Due to all these reservations, I recommend that the paper be rejected, but I emphasize that it is not for poor quality, but for lack of fit. I look forward to see a new methods paper emerging from this, in which the authors work hard to share a useful new approach with the scientific world that they also evaluate rigorously against existing approaches. I am convinced they have the potential to turn their paper into such a study, and I am also very confident that this would be the right way to go, instead of trying to sell this as some study with new insights, or a study with a method that beats all existing approaches, since this is obviously not the case.

# Response Letter to Reviewers

## Replies to Reviewer 1:

*Q1: The authors propose a vectorial framework to reconstruct the spatial dispersal of four language families around the world. The authors use a very wide range of methods that are borrowed from data science, physics and others from linguistics. I do not have the expertise to cover all of these methods, however the authors could help the reader understand if these methods are clustering algorithms, prediction methods, accuracy tests, etc. Some methods are called in the main text without further description, while some others are wrongly described, e.g. PCA is described in the main text as a similarity or clustering algorithm, actually PCA helps filtering out the least important features in order to describe a target variable in a space defined by superposition of few important features.*

## Replies to Q1:

We sincerely appreciate the invaluable suggestions provided by the reviewer. Our computational approach can be characterized as a kind of spatial reconstruction method that primarily encompasses other three distinct methods. The first one is the Principal Component Analysis (PCA) which is an unsupervised dimensionality reduction technique for rearranging linguistic traits into fewer more important new traits. The second one is the dynamic model consisting of ordinary differential equations for reconstructing the past states of linguistic traits. The third one is the geographic projection technique utilized for mapping the velocity vectors from the PC space into the geographic space. In the revised manuscript, we have modified unclear and problematic descriptions of our approaches and added more corresponding comprehensive explanations (*Lines 110-151* of the revised main text).

The reviewer has pointed out: “*PCA is described in the main text as a similarity or clustering algorithm, actually PCA helps filtering out the least important features in order to describe a target variable in a space defined by superposition of few important features*”. We are sorry for the imprecise descriptions of the PCA algorithm in the previous version of our manuscript. In this study, the PCA algorithm is not implemented to cluster language samples. Instead, it is used to reduce the dimension of linguistic traits by reassembling them into two important new traits (i.e., PC1 and PC2). Accordingly, each language sample can be visualized in the two-dimensional

33 PC space based on its PC1 and PC2 values. The Euclidean distances among pair-wise  
34 language samples in the PC space (i.e., PCA-based distance) represent their linguistic  
35 relatedness with each other. To be specific, the language samples sharing closer  
36 linguistic relatedness tend to distribute closer in the PC space. Therefore, the  
37 linguistic relatedness can be shown through the Euclidean distances among the  
38 language samples in the PC space.

39 It is noted that utilizing the PCA-based distance metric to assess sample  
40 relatedness is a prevailing practice in many studies within the fields of genetics and  
41 linguistics [1-3]. Accordingly, we employ the PCA-based distance to quantify the  
42 linguistic relatedness among language samples in this study. Following the reviewer's  
43 comments, we have revised all the contents related to the PCA algorithm (*Lines*  
44 *114-122* of the main text).

#### 45 **Reference**

46 [1] Wang, Chuan-Chao, et al. "Genomic insights into the formation of human  
47 populations in East Asia." *Nature* 591.7850 (2021): 413-419.

48 [2] Haak, Wolfgang, et al. "Massive migration from the steppe was a source for  
49 Indo-European languages in Europe." *Nature* 522.7555 (2015): 207-211.

50 [3] Norvik, Miina, et al. "Uralic typology in the light of a new comprehensive  
51 dataset." *Journal of Uralic Linguistics* 1.1 (2022): 4-42.

52

53 *Q2: The methods section is a repetition of the vague description of the tools made in*  
54 *the main text and no further information is provided. The reader needs to get to*  
55 *Supplementary Information #3 to finally get a technical description of the methods*  
56 *that should actually appear in the Methods section. However, here the technical*  
57 *details are not clearly expressed and the physical meaning of the vector is unclear.*  
58 *Due to this, all the following results are unclear.*

#### 59 **Replies to Q2:**

60 We appreciate these comments. Following the reviewer's comments, we have  
61 rephrased some vague descriptions of our approach and added more technical



62 descriptions and key mathematical formulas in the [Materials and Methods](#) section.  
 63 Considering the readability of the manuscript, detailed mathematical derivations and  
 64 professional mathematical terminology descriptions have still been retained in  
 65 [Supplementary Note 3](#). Moreover, we have also provided a new schematic diagram  
 66 ([Figure 1](#) in the revised manuscript) to illustrate the rationale and procedure of our  
 67 approach comprehensively. For the convenience of the reviewer, this figure is  
 68 attached below namely [Figure to Q2](#).

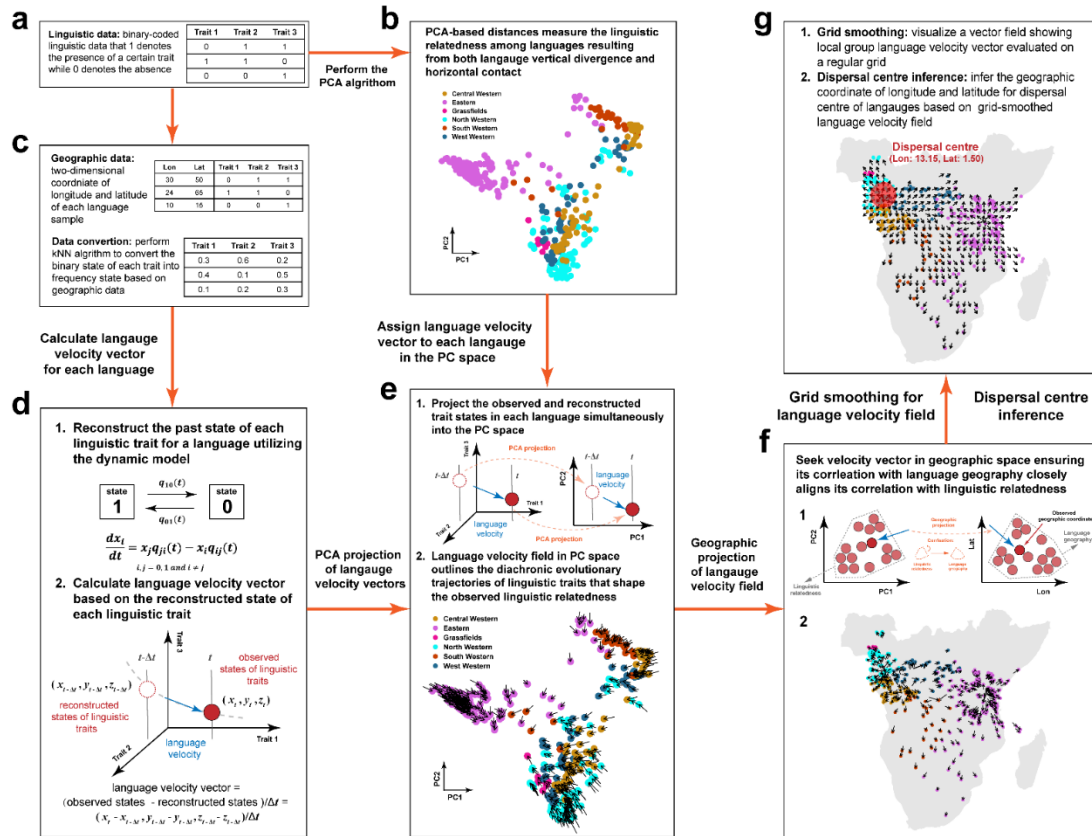

69

70 **Figure to Q2. Schematic diagram of language velocity field estimation (LVF) for**  
 71 **inferring the dispersal trajectories and centers of languages.** The computational  
 72 procedures of the LVF comprise two major steps. Subfigures (a) to (e) illustrate the  
 73 first step which is to estimate a velocity field on the PC space to outline the diachronic  
 74 evolutionary trajectories of linguistic traits that shape the observed linguistic  
 75 relatedness. Subfigures (f) to (g) illustrate the second step, which is to project the  
 76 velocity field from PC space into geographic space. Within the velocity field in  
 77 geographic space, the directions of the velocity vectors compose a set of continuously  
 78 changing trajectories that delineate from where these languages diffuse to their current  
 79 locations. These procedures are exemplified using the Bantu language family.

80 Comprehensive insights into the underlying principles and computational steps can be  
81 found in the [Materials and Methods](#) section, as well as [Supplementary Note 1](#).

82

83 *Q3: The text is hard to read, mostly due the presence of many typos and other*  
84 *grammar issues. Long sentences are used for speculative purposes, while key*  
85 *methodological descriptions are narrowed down to few vague sentences.*

86 **Replies to Q3:**

87 In the revised manuscript, we corrected the typos and grammar errors and  
88 modified several long and vague sentences. Furthermore, we engaged the AJE  
89 language editing service to thoroughly polish our manuscript (ID: Q2K9ZRSF). To  
90 make our methodological description clearer, we rephrased some vague sentences and  
91 added detailed mathematical formulas and explanations for our approach in the  
92 [Materials and Methods](#) section.

93

94 *Q4: I realize that the authors did a very hard work and that the storytelling is not*  
95 *easy to unroll in a linear way. Still, I feel that the authors should make an effort to*  
96 *simplify, correct and make the text clearer in order to be readable by an*  
97 *interdisciplinary audience.*

98 **Replies to Q4:**

99 We sincerely appreciate the reviewer's comments. Considering the readability of  
100 the interdisciplinary audience, we have rephrased the sentences in the manuscript to  
101 enhance the clarity and comprehensibility of the narrative. Moreover, we have  
102 rearranged the structure of our whole manuscript to improve its clarity and readability.

103

104 *Q5: typo in the abstract, the sentence “And its effectiveness and robustness have*  
105 *been carefully verified by both simulated and empirical validations” starts with*  
106 *“and”.*

107 **Replies to Q5:**

108 We greatly thank the reviewer for pointing this out. We have corrected this typo  
109 in the abstract as shown in the *Line 35* of the revised main text.

110

111 *Q6: line 87: again the sentence starts with “and”*

112 **Replies to Q6**

113 This typo has been corrected in the revision.

114

115 *Q7: “And such relatedness could vary with time when languages continuously*  
116 *dispersal into new regions.” sentence starts with “and” + dispersal is a noun, the*  
117 *verb is disperse. The same is repeated in many other sentences, please correct.*

118 **Replies to Q7**

119 These grammatical errors have been corrected in the revision.

120

121 *Q8: line 106: “The Principal Component Analysis (PCA) is implemented to exhibit*  
122 *the linguistic relatedness of present languages.” it is not clear on what variables the*  
123 *PCA is implemented. PCA identifies the most important variables to explain the*  
124 *variance of a target variable (in this case, I guess, the target variable is the*  
125 *languages relatedness?). Clustering classification is a forthcoming step.*

126 **Replies to Q8:**

127 We appreciate these important comments. In our study, Principal Component  
128 Analysis (PCA) has been applied to the binary-coded lexical trait, where the value 1

129 indicates the presence of the lexical trait in a language, while 0 signifies its absence.  
 130 More specifically, our dataset is organized in the form of a matrix comprising binary  
 131 values. The rows of this matrix correspond to diverse language samples, while the  
 132 columns denote distinct binary-coded lexical traits, as illustrated in [Table to Q8](#). In  
 133 this study, both the empirical and simulated datasets adhere to this form.

134 The target variables derived from the PCA process are not referred to as linguistic  
 135 relatedness. Instead, linguistic relatedness among language samples is represented by  
 136 their Euclidean distances within the PC space. Specifically, in this study, PCA is  
 137 employed to linearly transform lexical traits into two critical variables designated as  
 138 PC1 and PC2. These PC1 and PC2 variables are the target variables extracted by the  
 139 PCA algorithm. They represent the two most significant dimensions capable of  
 140 capturing the primary variations within the original linguistic traits. Consequently, we  
 141 can visually represent language samples based on their coordinates (PC1, PC2) within  
 142 a two-dimensional PC space. In this space, language samples with closer linguistic  
 143 relatedness are naturally distributed together. In such instances, the Euclidean  
 144 distances among language samples within the PC space serve as a manifestation of  
 145 their linguistic relatedness.

146 **Table to Q8.** The format of the linguistic dataset utilized in this study.

|                          | <b>Trait 1</b> | <b>Trait 2</b> | <b>Trait 3</b> | <b>...</b> | <b>Trait <i>k</i></b> |
|--------------------------|----------------|----------------|----------------|------------|-----------------------|
| <b>Language 1</b>        | 0              | 1              | 0              | ...        | 1                     |
| <b>Language 2</b>        | 1              | 0              | 1              | ...        | 1                     |
| <b>...</b>               | ...            | ...            | ...            | ...        | ...                   |
| <b>Language <i>n</i></b> | 1              | 1              | 0              | ...        | 0                     |

147

148 *Q9: subsection “Simulated validations for language velocity field estimation”. I*  
 149 *really struggle here to understand what data did the authors use to validate their*  
 150 *results. The dataset that is supposedly used as ground truth is also simulated by a*  
 151 *phylogeographic algorithm. The authors claimed in the introduction that this*  
 152 *method only captures vertical dependency of languages and not horizontal contacts*  
 153 *and borrowings. I am confused about what is the contribution of this validation.*  
 154 *Maybe the authors could add this discussion in the limitations of the study.*

155 **Replies to Q9:**

156 We are grateful for these comments. The reasons for utilizing the simulated  
157 datasets in this study are given below:

158 **1. Simulated datasets with known dispersal centers can be used for model**  
159 **validations**

160 The optimal validation for our methodology should be implemented relying on  
161 benchmark datasets where the actual language dispersal centers are already  
162 documented. These datasets enable us to validate our approach by comparing the  
163 estimated dispersal center locations with the documented ones. Since empirical  
164 datasets often lack precise information on the actual dispersal center locations,  
165 validating our approach using empirical datasets is challenging due to the credibility  
166 of the estimated dispersal center is hard to verify. Fortunately, a viable solution is  
167 provided by simulated datasets from Wichmann et al. (2021) [1]. These simulated  
168 datasets include known locations of true language dispersal centers, as they are  
169 generated through a random walk model applied to a phylogenetic tree assigned with  
170 given dispersal centers. Given the locations of the language dispersal centers are  
171 known in these simulated datasets, they can serve as robust benchmarks for validating  
172 our approach. In the previous manuscript, we extensively demonstrated the  
173 effectiveness and robustness of our approach based on these simulated datasets.

174 **2. Simulated datasets are not generated by the phylogeographic approach**

175 We would like to clarify that the simulated datasets are not generated through the  
176 phylogeographic approach but the random walk model. We understand that the  
177 unclear descriptions in the previous manuscript may have led the reviewer to consider  
178 these two approaches are the same. However, the phylogeographic approach is just a  
179 specific application of the random walk model in the phylogenetic domain [2-3]. The  
180 phylogeographic approach aims to backwardly reconstruct the language dispersal  
181 center based on the locations of observed language samples assigned to a  
182 phylogenetic tree. In contrast, the random walk model utilized in Wichmann et al.  
183 (2021) [1] is employed to forwardly generate the locations of observed language  
184 samples based on a phylogenetic tree assigned with a given language dispersal center.  
185 As mentioned in Wichmann et al. (2021), the generation of the simulated datasets  
186 follows below procedures:

187 *“...The simulation process can be summarized as follows. Movements are*

188 *constrained to any populated place on Earth, i.e. a place included in the*  
189 *geonames.org database. A starting point is found by randomly choosing from this set*  
190 *of populated places. At each time step there is a preset probability of moving to a new*  
191 *place within a square containing at least  $ch$  populated places.....The kind of*  
192 *movement we simulate here may be called a semi-random walk, since it is a kind of*  
193 *random walk constrained to populated places.....Maps of all 1000 cases, showing*  
194 *the homeland, intermediate stations, locations of current languages, and inferred*  
195 *homelands similarly to Figure 2 below, as well as the script that produced the maps,*  
196 *are provided in the electronic supplementary material (SI-11)....”*

197 Therefore, it is important to note that the simulated datasets are not produced  
198 through the phylogeographic approach, even though the simulation process  
199 incorporates the phylogenetic tree and random walk model.

### 200 **3. Simulated datasets as benchmarks for model comparisons**

201 **(i) Our approach and the phylogeographic approach share a common theoretical**  
202 **foundation but employ distinct implementation strategies.** Both our approach and  
203 phylogeographic approach involve two key steps in inferring language dispersal  
204 through the diachronic evolution of linguistic traits (Figure 1 to Q9). The first step  
205 entails delineating the diachronic evolutionary trajectories of linguistic traits that  
206 contribute to linguistic relatedness among observed language samples. The second  
207 step involves transforming these trajectories into language dispersal trajectories based  
208 on the correlation between linguistic relatedness and language geography [2, 4].

209 However, these two approaches differ in their detailed strategies for implementing  
210 these steps (Figure 1 to Q9). The primary distinctions revolve around how linguistic  
211 relatedness is represented. Specifically, in the phylogeographic approach, linguistic  
212 relatedness is represented by the phylogenetic tree, which captures only vertical  
213 language divergence. In contrast, our approach measures linguistic relatedness  
214 through the Euclidean distances among language samples in the two-dimensional PC  
215 space (PCA-based distance). This method can capture both vertical divergence and  
216 horizontal contact. We anticipate that our approach would perform similarly to the  
217 phylogeographic approach when linguistic relatedness can be explained by the tree  
218 model (Table to Q9). However, when linguistic relatedness cannot be fully explained  
219 by the tree model, there is a notable difference between the two approaches (Table to

220 Q9).

221 To illustrate this, we conducted comprehensive simulated and empirical  
222 comparisons between our approach and the phylogeographic approach. The results of  
223 the comparisons are summarized in Figure 3 in the revised main text. For the  
224 reviewer's convenience, we have attached this figure to this reply as Figure 2 to Q9. It  
225 is important to note that Figure 2 to Q9 outlines the comparison results not only  
226 between our approach and the phylogeographic approach but also against four other  
227 spatial reconstruction approaches: the diversity approach, the minimal distance  
228 approach, and the centroid approach. However, in this response, we focus solely on  
229 the comparison between our approach and the phylogeographic approach to highlight  
230 their similarities and differences (Figure 1 to Q9).

231 **(ii) Simulated comparisons when linguistic relatedness can be explained by the**  
232 **tree model.** The simulated datasets can serve as benchmarks to compare the  
233 performance between our approach and the phylogeographic approach when the  
234 linguistic relatedness can be explained by the tree model. Due to simulated datasets  
235 being generated based on a specific phylogenetic tree, the linguistic relatedness of the  
236 simulated language samples is solely raised by the vertical divergence. In other words,  
237 the linguistic relatedness among simulated language samples can be well captured by  
238 the tree model. Therefore, based on the simulated datasets, the dispersal centers  
239 inferred by the phylogeographic approach and our approach should be the same as  
240 each other.

241 Fortunately, the simulated results indeed showed the same performance between  
242 the phylogeographic approach and our approach ( $p$ -value  $> 0.05$ ; Figures 2b1 to Q9).  
243 More importantly, under the circumstance of the linguistic relatedness being solely  
244 raised by vertical divergence, the phylogenetic tree and PCA-based distance  
245 estimation can both adequately explain the linguistic relatedness ( $p$ -value  $< 0.05$ ;  
246 Figure 2b6 to Q9). It evidences that our approach and phylogeographic approach  
247 indeed share the same theoretical foundation but with different implementations.

248 **(iii) Empirical comparisons using simulated results as baselines when linguistic**  
249 **relatedness cannot be explained by the tree model.** The four empirical datasets can  
250 be utilized for comparisons between our approach and the phylogeographic approach  
251 when the linguistic relatedness cannot be explained by the tree model. Based on the

252 phylogenetic topology of simulated language samples as baseline (Figure 2b2 to Q9),  
253 the phylogenetic topology of language samples in four empirical datasets utilized in  
254 this study significantly deviates from the tree topology in this study ( $p$ -value  $< 0.05$ ;  
255 Figure 2b6 to Q9). It indicates that both vertical divergence and horizontal contact  
256 could have contributed to the linguistic relatedness among these empirical language  
257 samples. Accordingly, the phylogenetic tree cannot be able to adequately interpret the  
258 linguistic relatedness within these four empirical cases. Under this circumstance, we  
259 would anticipate different dispersal centers estimated by our approach and the  
260 phylogeographic approach in empirical applications.

261 With the estimated difference in simulated comparisons as the baseline, the  
262 empirical comparisons demonstrated a significant difference in performances between  
263 our approach and the phylogeographic approach in Sino-Tibetan and Arawak ( $p$ -value  
264  $< 0.05$ ; Figure 2a to Q9) languages. However, such difference was not observed in the  
265 Bantu and Indo-European languages ( $p$ -value  $> 0.05$ ; Figure 2a to Q9). The reason is  
266 that for Bantu and Indo-European languages, PCA-based distance and phylogenetic  
267 tree can both explain the linguistic relatedness among language samples ( $p$ -value  $<$   
268  $0.05$ ; Figure 2b6 to Q9). It indicates that the phylogenetic tree can explain the  
269 linguistic relatedness under the influence of a certain degree of horizontal contact. In  
270 contrast to Bantu and Indo-European languages, the comparison results showed that  
271 PCA-based distance (Sino-Tibetan:  $p$ -value  $< 0.05$ ; Arawak:  $p$ -value  $< 0.05$ ; Figure  
272 2b6 to Q9) could well explain the linguistic relatedness of Sino-Tibetan and Arawak  
273 languages, while the phylogenetic tree cannot (Sino-Tibetan:  $p$ -value = 0.115; Arawak:  
274  $p$ -value = 0.121; Figure 2b6 to Q9). These empirical comparisons confirm that the  
275 difference between our approach and the phylogeographic approach can be attributed  
276 to the distinct strategies for representing linguistic relatedness.

277 **In summary, the simulated and empirical comparisons confirm that the**  
278 **distinction between our approach and the phylogeographic approach is raised by**  
279 **their different explanatory power for linguistic relatedness. To be specific, when**  
280 **linguistic relatedness can be explained by the family-tree model, the performance**  
281 **between the phylogeographic approach and our approach is identical. However,**  
282 **when linguistic relatedness cannot be explained by the family-tree model, a**  
283 **notable distinction would emerge between the phylogeographic approach and**  
284 **our approach.** In the revision, all the aforementioned contents have been added to the  
285 revised main text as shown in the *Lines 153-172 and Lines 210-303*.



286 **Table to Q9.** Expected performance between the phylogeographic approach and our  
 287 approach utilizing simulated and empirical datasets.

|                                                                     |                                 | Simulated dataset   | Empirical dataset   |                    |
|---------------------------------------------------------------------|---------------------------------|---------------------|---------------------|--------------------|
| <b>Linguistic relatedness attribution</b>                           |                                 | Vertical divergence | Vertical divergence | Horizontal contact |
| <b>Whether the approaches can capture the divergence or contact</b> | <b>Phylogeographic approach</b> | ✓                   | ✓                   | ✗                  |
|                                                                     | <b>Language velocity field</b>  | ✓                   | ✓                   | ✓                  |
| <b>Equality of two approaches</b>                                   |                                 | =                   | ≠                   |                    |

288

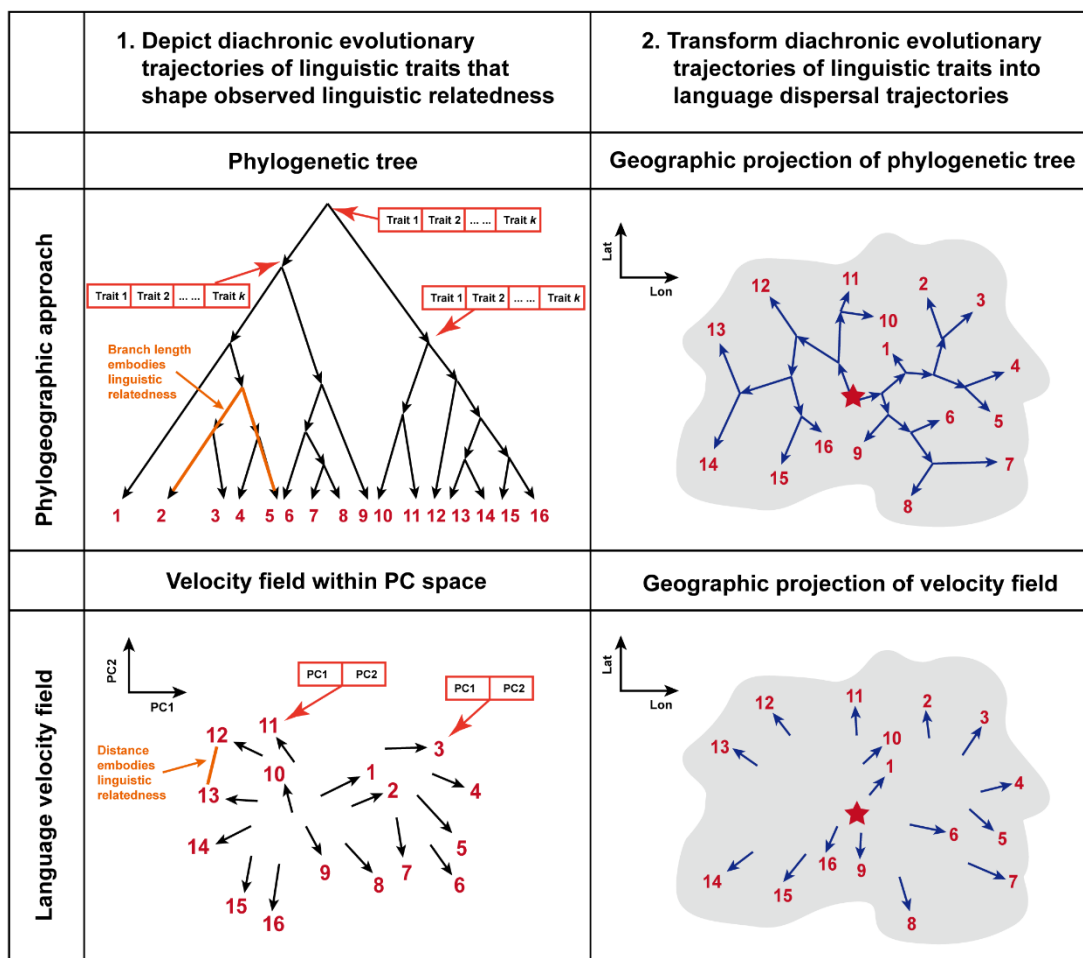

289

290 **Figure 1 to Q9. Language velocity field estimation (LVF) shares the same**  
 291 **foundation as the phylogeographic approach but with different implementation**  
 292 **strategies.** Both LVF and phylogeographic approach entails two major steps to infer  
 293 language dispersal pattern. The first is to depict the diachronic evolutionary  
 294 trajectories of linguistic traits that shape the observed linguistic relatedness. The  
 295 second is to transform these diachronic evolutionary trajectories of linguistic traits  
 296 into language dispersal trajectories. In the phylogenetic tree, each language is  
 297 determined by  $k$  linguistic traits. In the velocity field within PC space, each language  
 298 is determined by PC1 and PC2 which are rearranged from the  $k$  linguistic traits  
 299 through the PCA algorithm. The red number denotes a language. The black arrow  
 300 signifies the evolutionary direction of linguistic traits in a language. The blue arrow  
 301 represents the dispersal direction of a language. The red star denotes the estimated  
 302 dispersal center.

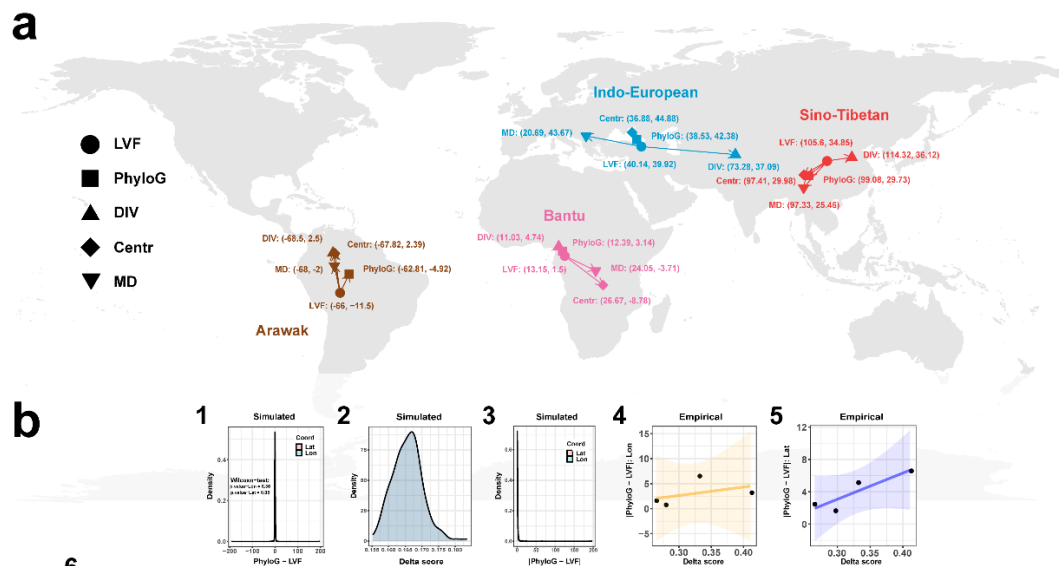

6

|                                          |                    | Simulation |          | Indo-European |          | Sino-Tibetan |          | Bantu  |          | Arawak |          |
|------------------------------------------|--------------------|------------|----------|---------------|----------|--------------|----------|--------|----------|--------|----------|
| Tree-likeness                            | Delta-score        | 0.1657     |          | 0.2656        |          | 0.3324       |          | 0.2976 |          | 0.4129 |          |
|                                          | $p$ -value         | -          |          | < 0.01        |          | < 0.01       |          | < 0.01 |          | < 0.01 |          |
| PhyloG-LVF                               | Difference         | Lon        | Lat      | Lon           | Lat      | Lon          | Lat      | Lon    | Lat      | Lon    | Lat      |
|                                          | $p$ -value         | -          | -        | 0.158         | 0.069    | 0.020        | 0.012    | 0.443  | 0.142    | 0.058  | 0.007    |
| Linguistic relatedness explanatory power |                    | $R^2$      | $p$ -val | $R^2$         | $p$ -val | $R^2$        | $p$ -val | $R^2$  | $p$ -val | $R^2$  | $p$ -val |
|                                          | PCA-based distance | 0.90       | < 0.01   | 0.37          | < 0.01   | 0.44         | < 0.01   | 0.68   | < 0.01   | 0.53   | < 0.01   |
|                                          | Phylogenetic tree  | 0.93       | < 0.01   | 0.39          | < 0.01   | 0.05         | 0.146    | 0.31   | < 0.01   | 0.09   | 0.075    |

303

304 **Figure 2 to Q9. The comparison between LVF and other spatial reconstruction**  
 305 **approaches.** a) The dispersal centres of four empirical language families and groups  
 306 inferred by five different approaches: language velocity field estimation (LVF),

307 phylogeographic approach (PhyloG), diversity approach (DIV), centroid approach  
308 (Centr), and minimal distance approach (MD). b1) The density plot for the  
309 distribution of differences between the coordinates of dispersal centres in the aspects  
310 of longitude and latitude inferred from LVF and PhyloG based on 1,000 simulated  
311 datasets. The p-value is calculated based on the Wilcoxon rank-sum test, where  $< 0.05$   
312 indicates that the difference between the inferred coordinates is significantly different  
313 from zero. b2) The density plot for the average delta score of the languages whose  
314 linguistic relatedness can be well-explained by the tree model. It was estimated from  
315 200 bootstrap replicates on the simulated languages. b3) The density plot for the  
316 distribution of the absolute differences in the aspects of longitude and latitude  
317 between the coordinates of dispersal centres inferred from LVF and PhyloG based on  
318 1,000 simulated datasets. b4) The linear relation between the average delta score and  
319 the absolute difference of the longitude estimated from LVF and PhyloG. The orange  
320 ribbon denotes the 95% confidence interval. b5) The linear relation between the  
321 average delta score and the absolute difference of the latitude estimated from LVF and  
322 PhyloG. The blue ribbon denotes the 95% confidence interval. b6) The table of the  
323 delta score, estimated difference between LVF and PhyloG, and linguistic relatedness  
324 explanatory power of PCA-based distance estimation and phylogenetic tree. The  
325 p-value is calculated by the Wilcoxon rank-sum test where  $< 0.05$  indicates the  
326 significance of the delta score, estimated difference, and linguistic relatedness  
327 explanatory power.

## 328 **Reference**

- 329 [1] Wichmann, Søren, and Taraka Rama. "Testing methods of linguistic homeland  
330 detection using synthetic data." *Philosophical Transactions of the Royal Society B*  
331 376.1824 (2021): 20200202.
- 332 [2] Bouckaert, Remco, et al. "Mapping the origins and expansion of the  
333 Indo-European language family." *Science* 337.6097 (2012): 957-960.
- 334 [3] Grollemund, Rebecca, et al. "Bantu expansion shows that habitat alters the route  
335 and pace of human dispersals." *Proceedings of the National Academy of Sciences*  
336 112.43 (2015): 13296-13301.
- 337 [4] Koile, Ezequiel, et al. "Geography and language divergence: The case of Andic  
338 languages." *Plos one* 17.5 (2022): e0265460.

339

340 *Q10: I would avoid the usage of the word “true”, unless there are striking evidences*  
341 *of the coordinates of the language dispersal origin.*

342 **Replies to Q10:**

343 We appreciate this comment. As elucidated in our **Replies to Q9**, the most  
344 significant characteristic of the simulated datasets is that they are generated based on  
345 the given language dispersal centers. In other words, the actual locations of the  
346 dispersal centers are already known within the simulated datasets. Following the  
347 reviewer’s suggestion, we have corrected the word “true” as “given” in the revised  
348 manuscript.

349

350 *Q11: what is the delta score of tree-likeness?*

351 **Replies to Q11:**

352 In the revision, we have added a comprehensive explanation of the delta score in  
353 *Lines 253-257* of the revised main text. Here, we provide a brief description. The  
354 delta score, denoted as  $\delta$  score, serves as a widely used metric for quantifying the  
355 likeness between the language phylogenetic topology and the tree topology in the  
356 phylo-linguistics [1-3]. In other words, the delta score quantifies the degree of  
357 linguistic relatedness of languages that can be explained by the tree model. The delta  
358 score is calculated based on the distance among the languages, with a value ranging  
359 from 0 to 1. A larger value of the delta score denotes that the language phylogenetic  
360 topology is more compatible with the tree topology [4]. In other words, a larger value  
361 of the delta score signifies that the linguistic relatedness is less affected by the  
362 horizontal contacts and can be better explained by the tree model.

363 **Reference**

364 [1] Greenhill, Simon J., et al. "Evolutionary dynamics of language systems."  
365 *Proceedings of the National Academy of Sciences* 114.42 (2017): E8822-E8829.

366 [2] Kolipakam, Vishnupriya, et al. "A Bayesian phylogenetic study of the Dravidian

367 language family." Royal Society open science 5.3 (2018): 171504.

368 [3] Birchall, Joshua, Michael Dunn, and Simon J. Greenhill. "A combined  
369 comparative and phylogenetic analysis of the Chapacuran language family."  
370 International Journal of American Linguistics 82.3 (2016): 255-284.

371 [4] Holland, Barbara R., et al. "δ plots: a tool for analyzing phylogenetic distance  
372 data." Molecular biology and evolution 19.12 (2002): 2051-2059.

373

374 *Q12: the authors do not describe the data they used accurately. For instance, what*  
375 *is a trait? What is a cognate? It is never stated.*

376 **Replies to Q12:**

377 We thank the reviewer for pointing this out. In this study, our datasets contain the  
378 Indo-European, Sino-Tibetan, Bantu, and Arawak lexical cognate datasets derived  
379 from the previous publications respectively [1-4]. These datasets contain several  
380 lexical words following a specific wordlist such as Swadesh 100 or 200 wordlist.  
381 Each word (item) contains different lexical cognates identified by linguistic experts,  
382 which manifest the same meaning and similar sounds. Furthermore, each cognate has  
383 been transformed into a binary-coded lexical trait where the value of 1 denotes the  
384 presence of this cognate in the language, while 0 indicates its absence (an example of  
385 cognate coding is shown in [Table to Q12](#)). Accordingly, the Indo-European dataset  
386 contains 5,995 binary lexical cognates across 103 language samples; the Sino-Tibetan  
387 dataset encompasses 949 binary lexical cognates across 109 Sino-Tibetan language  
388 samples; the Bantu dataset comprises 3,859 binary lexical cognates across 420  
389 language samples; Arawak dataset involves 694 binary lexical cognates across 60  
390 language samples. The detailed cognate coding process for each case is described as  
391 follows.

392 For the Indo-European lexical dataset, Bouckaert et al. compiled 207 lexical  
393 items [1]. According to these lexical items, they identified 5,995 cognates across 103  
394 Indo-European languages, which were further recoded as 5,995 binary-coded lexical  
395 traits. Bouckaert et al. described their cognate coding process as follows: "We  
396 recorded word forms and cognacy judgments across 207 meanings in 103

397 contemporary and ancient languages.... Cognate data were coded as binary  
398 characters showing the presence or absence of a cognate set in a language. There  
399 were 5995 cognate sets in total, with most meanings represented by several different  
400 cognate sets. All cognate coding decisions were checked with published historical  
401 linguistic sources (Table S1). The database contained 25908 cognate coded lexemes.  
402 Of these, 67% came originally from ref. (17 ), 14% from ref. (16 ), and 19% were  
403 newly compiled from published sources. Ref. (17 ) required considerable correction,  
404 and changes were made to approximately 26% of coding decisions on individual  
405 lexemes. Ref. (16 ) required corrections to only 0.5% of lexemes.”.

406 For the Sino-Tibetan lexical dataset, Zhang et al. compiled 90 lexical items from  
407 the *Sino-Tibetan Etymological Dictionary and Thesaurus* (STEDT) project [5]. These  
408 lexical items also appear in *Swadesh’s 100-word list* [6]. These selected lexical items  
409 facilitated the identification of 949 cognates across 109 Sino-Tibetan languages,  
410 which were then encoded as 949 binary-coded lexical traits. Zhang et al. described  
411 their cognate coding process as below: “*The lexical root-meanings used in this study*  
412 *came from the Sino-Tibetan Etymological Dictionary and Thesaurus (STEDT)*  
413 *project1, which was developed by a number of experienced historical linguists led by*  
414 *James A. Matisoff over a 30-year period (URL: <http://stedt.berkeley.edu/>).....To*  
415 *minimize the word lateral transfers, in this study we chose only the words with*  
416 *meaning inside the Swadesh 100-word list, since they are relatively resistant to*  
417 *borrowing2.....In order to make sure that all the languages were comparable to each*  
418 *other, we filtered only those languages with at least 90 lexical meanings of Swadesh*  
419 *100-word list recorded (no matter whether an RM exists) and 30 – 120*  
420 *RMs.....Finally, we retained 109 ST language samples with 949 binary-coded lexical*  
421 *RMs for further phylogenetic analyses.”*

422 For the Bantu lexical dataset, Grollemund et al. compiled 100 lexical items from  
423 the *Atlas Linguistique du GABon list* [7], of which 68 lexical items overlap with  
424 *Swadesh’s 100-word list*. According to these lexical items, they recognized 3,859  
425 cognates across 420 Bantu languages. These 3,859 cognates were further transformed  
426 into 3,859 binary-coded lexical traits. Grollemund described their cognate coding  
427 process as: “*For phylogenetic inference, we used a selection of 100 meanings*  
428 *comprising a modified version of the Atlas Linguistique du GABon list (52). The Atlas*  
429 *includes 159 meanings, and our sample of 100 meanings are those that are best*  
430 *documented for the languages we studied.....We identified 3,859 cognate sets across*

431 *the n = 100 meanings. These were coded as binary characters for purposes of*  
 432 *phylogenetic analysis.”*

433 For the Arawak lexical dataset, Walker et al. compiled *Swadesh’s 100-word list*  
 434 and identified 694 cognates across 60 Arawak languages. Subsequently, these  
 435 cognates were then recoded as 694 binary-coded lexical traits. Walker et al. described  
 436 their cognate coding process as below: “*We compiled Swadesh [20] lists of 100*  
 437 *common vocabulary items and scored cognate sets across 60 Arawak languages and*  
 438 *dialects representing all the major branches of the Arawak language family (see*  
 439 *electronic supplementary material, table S1).....We transformed coded cognates into*  
 440 *binary codes for each variant with sites representing whether any particular cognate*  
 441 *set is present (‘1’) or absent (‘0’) in that language..... The method yields 694 sites of*  
 442 *which 88 per cent are complete.”*

443 According to the reviewer’s suggestions, we have incorporated the  
 444 aforementioned contents about the cognate and binary-coded lexical trait in *Lines*  
 445 *373-382* of the revised main text.

446 **Tabel to Q12.** Example of cognate coding using two lexical items (Mouth and Bone)  
 447 for four languages: Apurina, Bare, Yavitero, and Palikur. Lexical lists (left table) are  
 448 transformed into binary codes for each cognate variant with sites representing whether  
 449 any particular cognate is present ("1") or absent ("0") in that language (right table).

|                 | Lexical item |             |
|-----------------|--------------|-------------|
|                 | Mouth        | Bone        |
| <b>Apurina</b>  | <i>nama</i>  | <i>api</i>  |
| <b>Bare</b>     | <i>numa</i>  | <i>bani</i> |
| <b>Yavitero</b> | <i>numa</i>  | <i>ihiu</i> |
| <b>Palikur</b>  | <i>by</i>    | <i>api</i>  |

Transform  
data into  
binary  
codings  
→

| Lexical trait   | Mouth |   | Bone |   |
|-----------------|-------|---|------|---|
|                 | A     | B | A    | B |
| <b>Apurina</b>  | 1     | 0 | 1    | 0 |
| <b>Bare</b>     | 1     | 0 | 1    | 0 |
| <b>Yavitero</b> | 1     | 0 | 0    | 1 |
| <b>Palikur</b>  | 0     | 1 | 1    | 0 |

450

451 **Reference**

- 452 [1] Bouckaert, Remco, et al. "Mapping the origins and expansion of the  
453 Indo-European language family." *Science* 337.6097 (2012): 957-960.
- 454 [2] Zhang, Menghan, et al. "Phylogenetic evidence for Sino-Tibetan origin in  
455 northern China in the Late Neolithic." *Nature* 569.7754 (2019): 112-115.
- 456 [3] Grollemund, Rebecca, et al. "Bantu expansion shows that habitat alters the route  
457 and pace of human dispersals." *Proceedings of the National Academy of Sciences*  
458 112.43 (2015): 13296-13301.
- 459 [4] Walker, Robert S., and Lincoln A. Ribeiro. "Bayesian phylogeography of the  
460 Arawak expansion in lowland South America." *Proceedings of the Royal Society B:  
461 Biological Sciences* 278.1718 (2011): 2562-2567.
- 462 [5] Matisoff, James A. "Sino-Tibetan etymological dictionary and thesaurus  
463 (STEDT)." Berkeley: Sino-Tibetan Etymological Dictionary and Thesaurus  
464 Project.(stedt.berkeley.edu/dissemination/STEDT.pdf)[accessed on 18 October 2020]  
465 (2015).
- 466 [6] Swadesh, Morris. "Towards greater accuracy in lexicostatistic dating."  
467 *International journal of American linguistics* 21.2 (1955): 121-137.
- 468 [7] Hombert, Jean-Marie. "Atlas linguistique du Gabon." *Revue gabonaise des  
469 Sciences de l'homme* 2 (1990): 37-42.

470

471 *Q13: "Third, the changes in the state frequencies of linguistic traits are*  
472 *proportional to their sociolinguistic prestige in a certain area." I don't get the logic*  
473 *of this sentence. What is the meaning of prestige here? The definition of prestige is*  
474 *expressed only in the next paragraph, it should be introduced before going into*  
475 *interpretations.*

476 **Replies to Q13:**

477 We thank the reviewer for pointing this out. This prestige parameter reflects the  
478 social opportunities or convenience for individuals who speak a specific language  
479 containing a particular trait state [1]. States of linguistic traits with higher prestige



480 would be more prevalent in future generations, while those with lower prestige would  
481 be less prevalent. Accordingly, the prestige of a specific state in a linguistic trait can  
482 be mathematically defined as the probability of this linguistic trait remaining in that  
483 state after a unit of time. According to the reviewer's comment, we have modified the  
484 corresponding section and rearranged the sequence of the paragraph related to the  
485 prestige parameter as shown in *Lines 408-412* of the revised main text.

486 **Reference:**

487 [1] Abrams, Daniel M., and Steven H. Strogatz. "Modelling the dynamics of  
488 language death." *Nature* 424.6951 (2003): 900-900.

489

490 *Q14: "It is noted that the larger length of the velocity vector of a language denotes*  
491 *the more rapid change of this language during its evolution". The reader is*  
492 *provided with no tools to understand this sentence. A schematic representation of a*  
493 *vector could really help. E.g. what are the elements of a vector?*

494 **Replies to Q14:**

495 We appreciate your comment. In the revision, we have added a more  
496 comprehensive schematic representation for the velocity vector in [Figure 1d](#) of the  
497 revised main text. We also attach this subfigure related to the calculation of the  
498 velocity vector at the end of this **Replies to Q14** ([Figure to Q14](#)).

499 As shown in [Figure to Q14](#), we can see that each velocity vector contains two  
500 aspects: direction and length. Each vector is calculated as the difference between the  
501 past reconstructed and current trait states divided by the reconstruction time.  
502 Accordingly, the direction of each vector signifies the direction of the diachronic  
503 change of the linguistic traits in each language in the high-dimensional space and  
504 low-dimensional PC space (i.e., 2-D PC plot). In short, the direction of each vector  
505 depicts how the linguistic traits evolve into their current states. Moreover, when the  
506 linguistic traits of a language undergo rapid evolution, its trait states should change  
507 significantly over a given time period. Such change can be represented by the length  
508 of the velocity vector visualized as an arrow in the high-dimensional space and  
509 low-dimensional PC space. However, our study exclusively concentrates on the

510 language dispersal pattern which can be reflected solely by the directions of the  
 511 velocity vectors. Accordingly, the lengths of the velocity vectors are actually not  
 512 utilized in this study. Noting these, we have removed the descriptions about the  
 513 lengths of velocity vectors in the revised manuscript.

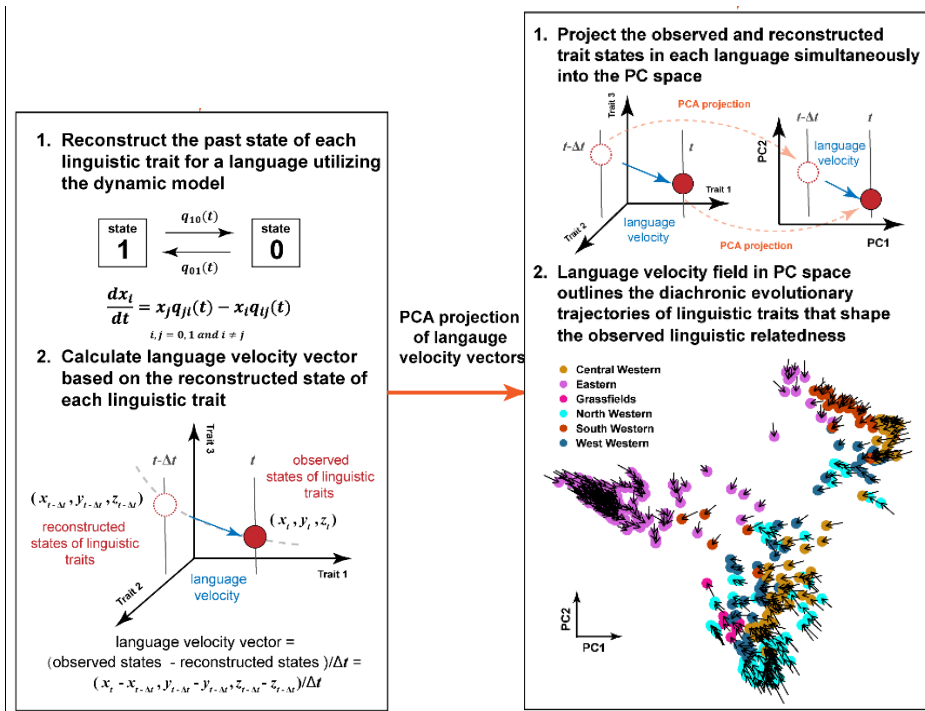

514

515 **Figure to Q14.** Schematic diagram of the calculation of velocity vector.

516

517 *Q15: Does the PCA find only two components, or the authors found that more*  
 518 *components did not lead to more variance explainability? Again, PCA here is*  
 519 *presented as a tool to find similarities among datapoints, actually it is a*  
 520 *rearrangement of the predictors of the model that tells what are the most important*  
 521 *features in the model. The authors say nothing about all this. Projecting the points*  
 522 *in to the PC space allows to visualize clusters, but actual clustering is performed by*  
 523 *other tools, such as k-nearest-neighbors.*

524 **Replies to Q15:**

525 Thank you for your comments. We have three specific reasons for selecting only  
 526 two principal components in this study which are explained below:

527 Firstly, visualizing the samples in a two-dimensional plane using two principal  
528 components is a common and effective practice [1-3]. It enables a clear visualization  
529 of the distribution of the data points in a two-dimensional plane. Accordingly, we also  
530 selected two principal components and visualized the language samples in the  
531 two-dimensional space.

532 Secondly, in the subsequent step of our approach, the language velocity field will  
533 be projected from the PC space into the two-dimensional (i.e., longitude and latitude)  
534 geographic space. By selecting the first two principal components, we ensure that the  
535 PC space and the geographic space share an identical dimension, thereby preventing  
536 the loss of information during geographic mapping. For instance, attempting to map a  
537 three-dimensional language velocity field to a two-dimensional geographic space  
538 would result in the loss of one crucial dimension of information regarding the  
539 language velocity field. Nevertheless, the reviewer provided a novel insight into our  
540 approach. It is that when the geographic coordinates of language samples have a  
541 higher dimension, it would be prudent to retain more principal components for the  
542 geographic mapping of the language velocity field.

543 Thirdly, according to the simulated validations, we found that relying on two  
544 principal components was sufficient to estimate a reliable language velocity field in  
545 the geographic map. Based on this language velocity field, we could accurately reflect  
546 the language dispersal trajectories and centers. Consequently, we only selected two  
547 principal components for the construction of the velocity field in this study.

548 Fourthly, we do not conduct the PCA algorithm to cluster or find similarities  
549 among language samples. Actually, in this study, the PCA algorithm is only conducted  
550 to recombine the original traits into two important traits. we plot each language  
551 sample according its coordinate (PC1, PC2) in the 2-dimensional PC space. The  
552 shorter Euclidean distances among language samples in PC space embody their higher  
553 linguistic relatedness. However, if we aim to further identify which language samples  
554 should be clustered together, we will need to employ other clustering approaches.  
555 According to the reviewer's comments, we have revised the descriptions about the  
556 PCA algorithm as shown in the *Lines 114-122* of the revised main text.

## 557 **Reference**

558 [1] Wang, Chuan-Chao, et al. "Genomic insights into the formation of human

559 populations in East Asia." Nature 591.7850 (2021): 413-419.

560 [2] Haak, Wolfgang, et al. "Massive migration from the steppe was a source for  
561 Indo-European languages in Europe." Nature 522.7555 (2015): 207-211.

562 [3] Norvik, Miina, et al. "Uralic typology in the light of a new comprehensive  
563 dataset." Journal of Uralic Linguistics 1.1 (2022): 4-42.

564

565 *Q16: it is not clear how the vectors are formed in the PC space. Up to my*  
566 *understanding the PCA describes the datapoint with two components, hence I*  
567 *expect to observe a single point with coordinates (PC1,PC2) in the PC space. By the*  
568 *way, we cannot build a vector with one point. I understand from SI-3 that the*  
569 *vectors are computed as the difference in the PC space of  $X(t) - X(-m)$ , where  $t=0$*   
570 *represents now and  $t=-m$  represents a moment in the past. What is this moment in*  
571 *the past? Then I read "Therefore, VI describes the change of the state frequencies*  
572 *of language l in a unit of time.". what is the unit of time? Years, centuries?*

573 **Replies to Q16:**

574 We sincerely thank the reviewer for bringing up these important points. We  
575 address the reviewer's concern as below.

#### 576 **1. The derivation of the velocity vectors in PC space**

577 We agree with the reviewer that PCA can describe each current language sample  
578 with two components PC1 and PC2. The PC1 and PC2 are derived by applying a  
579 matrix  $A_{2 \times n}$  (2 rows and  $n$  columns) to each current language sample  $l_{current} = [x_1, \dots,$   
580  $x_n]^T$  ( $n$  linguistic traits):  $[PC1_{current}, PC2_{current}]^T = A l_{current} = A[x_1, \dots, x_n]^T$ . It can be  
581 regarded as projecting a  $n$ -dimensional vector into a 2-dimensional PC space as a  
582 2-dimensional vector. Therefore, we can only observe a single language point with a  
583 coordinate  $(PC1_{current}, PC2_{current})$  in the PC space.

584 However, given a dynamic model [1-3], our approach can reconstruct the past  
585 trait states for each language sample according to its current observed trait states  
586 noted as  $l_{past} = [y_1, \dots, y_n]^T$ . When projecting current trait states for each language  
587 sample into the PC space, we simultaneously project its past trait states into this PC

588 space as well:  $[PC1_{past}, PC2_{past}]^T = Al_{past} = A[y_1, \dots, y_n]^T$ . Therefore, we can observe  
589 two points noted as  $(PC1_{current}, PC2_{current})$  and  $(PC1_{past}, PC2_{past})$  in the PC space,  
590 where one represents the current trait states of this language sample, and another  
591 represents its past trait states. By taking the difference between these two points  
592 divided by the reconstruction time, we can derive a vector that describes the rate and  
593 direction of the changes in the trait states of this language sample.

594 According to the reviewer's suggestions, the calculations of the vectors are  
595 illustrated by a schematic diagram in [Figure 1](#) in the revised main text. For the  
596 convenience of the reviewer, we have attached the subfigure of [Figure 1](#) related to the  
597 calculation of velocity vectors below as [Figure 1 to Q16](#).

## 598 **2. The definition of a unit of time**

### 599 **(i) The definition of a unit of time is identical to the one in the phylogenetic study.**

600 The velocity vector is calculated as the difference in the PC space of  $X(0) - X(-m)$   
601 divided by reconstruction time  $m$ , where  $t = 0$  represents the present time, and  $t = -m$   
602 represents a moment in the past. Here,  $m$  denotes  $m$  units of times, and  $-m$  thus  
603 represents  $m$  units of times before the present time. Given that we often have limited  
604 knowledge regarding the precise origin time of past languages, we thus define a unit  
605 of time as one generation. It serves as a dimensionless time indicator representing the  
606 period during which the linguistic traits in language accumulate one mutation. This  
607 definition of the unit of time in our study is identical to the definition in the  
608 phylogenetic tree where no exact time calibrations have been made (hereafter  
609 non-time-calibrated phylogenetic tree).

610 To be specific, in a non-time-calibrated phylogenetic tree, the branch length  
611 between a parent node and a child node (where the language is referred to as a node  
612 for convenience hereafter) represents the time during which the child language has  
613 evolved from its parent language. This branch length is typically represented by the  
614 number of mutations that occurred in linguistic traits during the evolution of the child  
615 language from its parent language. Because the longer evolutionary time of a  
616 language results in more mutations being accumulated in linguistic traits (see [Figure 2](#)  
617 [to Q16](#) attached below) [4-5]. Under this circumstance, a unit of time is defined as the  
618 period in which the linguistic traits of language undergo one mutation.

### 619 **(ii) A unit of time can be calibrated based on prior origin time.** This dimensionless

620 unit of time can be further converted into the exact period once given the precise  
621 origin time of the parent language (see [Figure 2 to Q16](#) attached below). For instance,  
622 we assume that one branch length between a parent language  $L5$  and a child language  
623  $L4$  within a non-time-calibrated phylogenetic tree corresponds to 100 mutations (see  
624 [Figure 2 to Q16](#) attached below). Moreover, we assume that we also possess prior  
625 knowledge about the precise origin time of that parent language, said 500 years ago.  
626 Accordingly, we can calibrate the unit of time as  $500/100 = 5$  years using the  
627 commonly utilized strict molecular clock model in linguistics which assumes the  
628 mutation rate is constant [3, 6]. According to this unit of time with exact time  
629 calibration, we can calibrate all the branch lengths with exact periods in the  
630 non-time-calibrated phylogenetic tree according to the times of mutations (see [Figure](#)  
631 [2 to Q16](#) attached below).

632 Similarly, the unit of time defined in our approach can also be converted to an  
633 exact period in our approach, once we have prior knowledge about the precise origin  
634 times of the past language samples. Nevertheless, the calibration of the unit of time in  
635 our approach is not essential, since our approach is not designed to estimate the  
636 divergence time of languages. It is just like the application of the phylogeographic  
637 approach to a non-time-calibrated phylogenetic tree to solely infer the geographical  
638 dispersal center of languages [7]. We have added the definition of unit of time into the  
639 *Lines 441-443* of the revised main text.

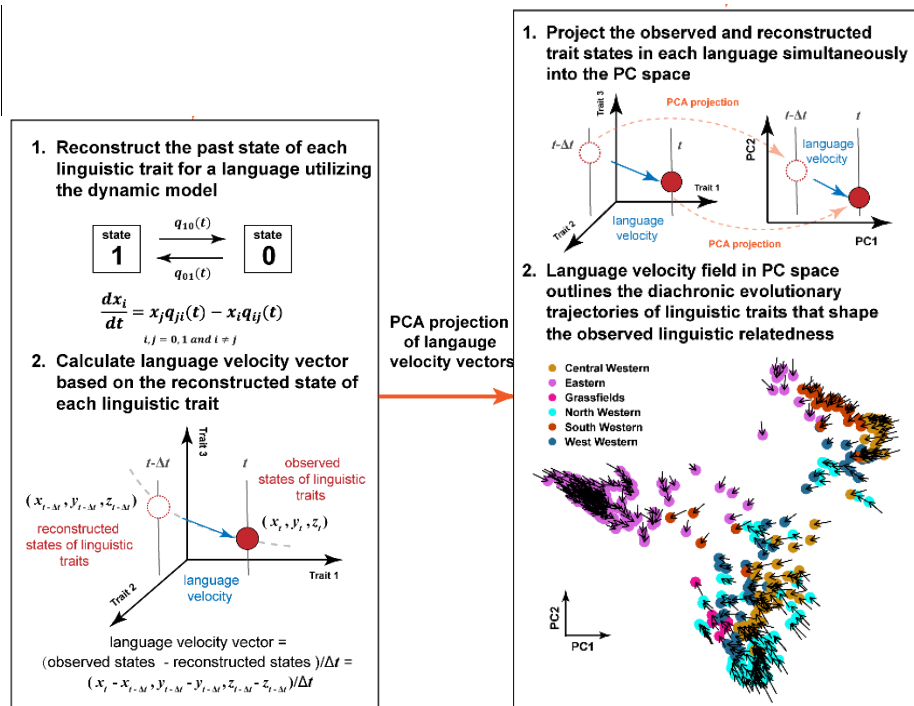

640

641 **Figure 1 to Q16.** The calculation of velocity vectors in the PC space.

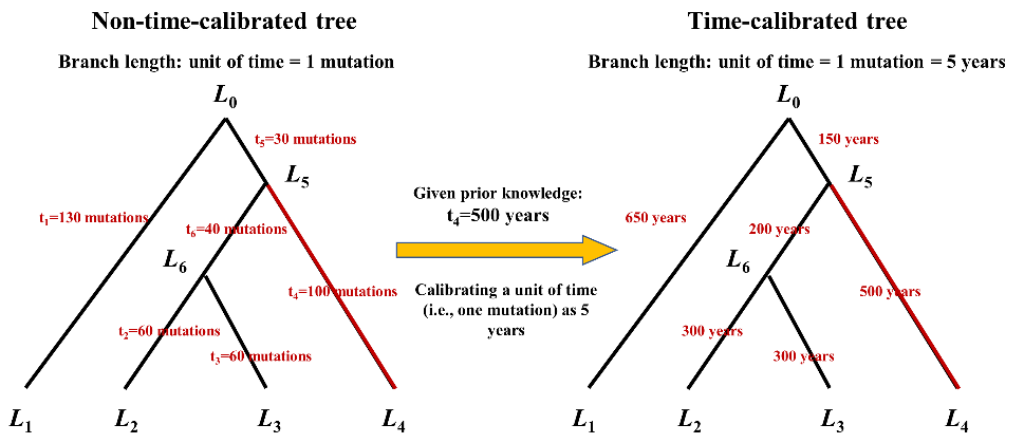

642

643 **Figure 2 to Q16.** Calibrating each branch length of the non-time-calibrated tree based  
 644 on the mutation times and prior knowledge about language divergence times.

645 **Reference**

646 [1] Yang, Ziheng. "Maximum-likelihood estimation of phylogeny from DNA  
 647 sequences when substitution rates differ over sites." *Molecular biology and evolution*  
 648 10.6 (1993): 1396-1401.

649 [2] Penny, David, et al. "Mathematical elegance with biochemical realism: the  
650 covarion model of molecular evolution." *Journal of Molecular Evolution* 53 (2001):  
651 711-723.

652 [3] Zhang, Menghan, et al. "Phylogenetic evidence for Sino-Tibetan origin in  
653 northern China in the Late Neolithic." *Nature* 569.7754 (2019): 112-115.

654 [4] Choudhuri, Supratim. *Bioinformatics for beginners: genes, genomes, molecular  
655 evolution, databases and analytical tools*. Elsevier, 2014.

656 [5] Lewis, Paul O. "A genetic algorithm for maximum-likelihood phylogeny  
657 inference using nucleotide sequence data." *Molecular biology and evolution* 15.3  
658 (1998): 277-283.

659 [6] Chang, Will, et al. "Ancestry-constrained phylogenetic analysis supports the  
660 Indo-European steppe hypothesis." *Language* (2015): 194-244.

661 [7] Walker, Robert S., and Lincoln A. Ribeiro. "Bayesian phylogeography of the  
662 Arawak expansion in lowland South America." *Proceedings of the Royal Society B:  
663 Biological Sciences* 278.1718 (2011): 2562-2567.

664

665 *Q17: what is the delta score and how is it computed? It is never stated in the text,*  
666 *nor in the SI*

667 **Replies to Q17:**

668 We thank the reviewer for pointing this out. The rationale for the delta score has  
669 been introduced in the **Replies to Q11**. Here, we offer a brief description of its  
670 calculation procedure.

671 For any quarter of four elements  $x, y, u,$  and  $v,$  we denote  $d_{xy|uv} = d_{xy} - d_{uv}$ .  
672 Then, the delta score is defined as the ratio  $\delta_q = \frac{d_{xv|yu} - d_{xu|yv}}{d_{xv|yu} - d_{xy|uv}}$  [1]. This ratio  
673 measures the tree-likeness of the quartet  $q$  that  $\delta_q = 0$  if  $d_{xv|yu} = d_{xu|yv} = d_{xy|uv}$   
674 hold. The larger the value of  $\delta_q$  indicates the less treelike of  $q$ . The average value of  
675  $\delta_q$  of the all-possible quarter of the language samples thus can serve as the metric to



676 quantify the overall tree-likeness of the language topology. In this study, the delta  
677 score is calculated using the “*delta.plot*” function of the “*ape*” package [2]. The  
678 corresponding contents have been included in *Lines 579-580* of the [Materials and](#)  
679 [Method](#) section of the revised main text.

## 680 **Reference**

681 [1] Holland, Barbara R., et al. "δ plots: a tool for analyzing phylogenetic distance  
682 data." *Molecular biology and evolution* 19.12 (2002): 2051-2059.

683 [2] Paradis, Emmanuel, and Klaus Schliep. "ape 5.0: an environment for modern  
684 phylogenetics and evolutionary analyses in R." *Bioinformatics* 35.3 (2019): 526-528.

685

686 *Q18: Later on I read “In this study, we set  $m = 1$ .”, but no reason is given, nor the*  
687 *unit of time is stated. One year? One century? Again, this is very opaque.*

## 688 **Replies to Q18:**

689 We appreciate the reviewer for pointing these out. As mentioned in the **Replies to**  
690 **Q16**, a unit of time in this study is defined as one generation, which serves as a  
691 dimensionless time indicator representing a period during which the linguistic traits in  
692 language accumulate one mutation. This dimensionless unit of time can be converted  
693 into an exact time once the precise divergence time of the past language sample is  
694 given. However, the exact time calibration of the unit of time is not necessary in our  
695 approach, since our approach is designed to infer the dispersal pattern of languages  
696 rather than their origin time.

697 In this study, the setting of  $m = 1$  is chosen based on the results of both empirical  
698 and simulated validations. To be specific, in simulated validations, we demonstrated  
699 that relying on the setting  $m = 1$  could estimate a reliable language velocity field in  
700 the geographic space. Based on this language velocity field, the estimated language  
701 dispersal center shows no significant difference from the prior given dispersal center  
702 ([Figure 1 to Q18](#)).

703 Without a loss of generality, we also tested the robustness of the language  
704 velocity field estimated through different settings of  $m$  in simulated validations. The

705 results indicate that there are no significant differences among the language velocity  
 706 fields estimated through different settings of  $m$  (Figure 2 to Q18). These results  
 707 indicate that the rate of change of linguistic traits can remain relatively constant  
 708 during different evolutionary periods. It is compatible with the rate assumption of the  
 709 widely-used molecular clock model in linguistics that postulates the evolutionary rate  
 710 of linguistic traits is constant [1-2]. In other words, the velocity vector is almost  
 711 unchanged either setting  $m = 1$  or setting  $m$  as other different reconstruction times.  
 712 Therefore, it is feasible to estimate the velocity vector for representing the diachronic  
 713 change in linguistic traits by setting  $m = 1$ .

714 According to the simulated validations, we further set  $m = 1$  in the empirical  
 715 applications. Without a loss of generality, we also tried different parametric settings of  
 716  $m$  in the empirical applications. The results also suggested that the language velocity  
 717 field was robust under different settings of  $m$  (Figure 3 to Q18), and all could identify  
 718 the language dispersal centers that can be supported by genetic and archaeological  
 719 evidence. Based on all these empirical and simulated validations, we ultimately set  $m$   
 720  $= 1$  as the default parametric value in our approach.

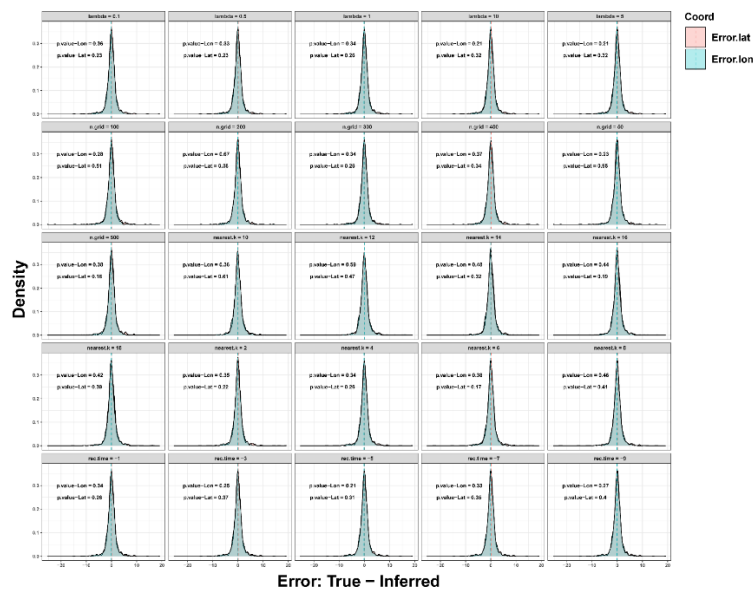

721

722 **Figure 1 to Q18. The simulated validation for the effectiveness of the language**  
 723 **velocity field estimation (LVF) under different parametric settings.** The  
 724 probability density plot demonstrates the distributions of the errors of the longitude  
 725 and latitude respectively between the true and inferred language dispersal center  
 726 estimated from 1,000 simulated datasets under different parametric settings. These

727 parameters are the number of the grid points  $n.grid$  ( $n.grid = 50, 100, 200, 300, 400,$   
728 and 500); the number of the nearest neighbors  $k$  ( $k = 2, 4, 6, \dots,$  and 18); mutation rate  
729 of Poisson process  $\lambda$  ( $\lambda = 0.1, 0.5, 1, 5,$  and 10); reconstruction time  $m$  ( $m = 1, 3, 5, 7,$   
730 and 9). We set the default parametric values as  $n.grid = 300, k = 4, \lambda = 1,$  and  $m = 1$   
731 when varying across the settings of these parameters respectively. The black texts are  
732 the  $p$ -value of the statistical significance of the error derived from the Wilcoxon  
733 rank-sum test.  $p$ -value  $> 0.05$  denotes the statistical non-significance of the error  
734 (significantly equal to 0).

735

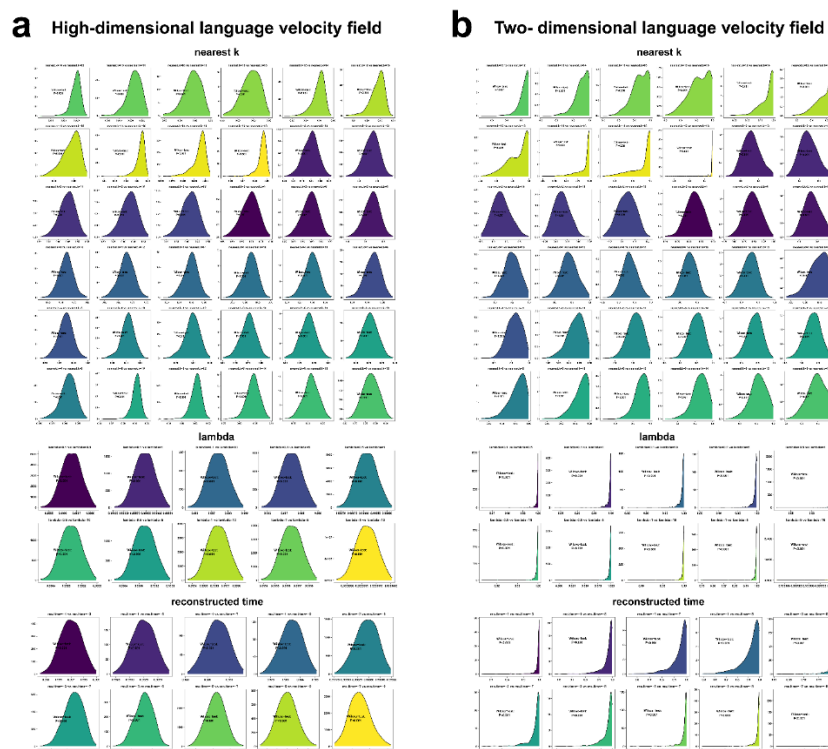

736

737 **Figure 2 to Q18. The simulated validation for the robustness of the language**  
738 **velocity field estimation (LVF) under different parametric settings.** The  
739 probability density plot demonstrates the distribution of the average cosine similarity  
740 between language velocity fields estimated from 1,000 simulated datasets under  
741 different parametric settings. The parameters are the number of the nearest neighbors  
742  $k$  ( $k = 2, 4, 6, \dots,$  and 18); mutation rate of Poisson process  $\lambda$  ( $\lambda = 0.1, 0.5, 1, 5,$  and  
743 10); reconstruction time  $m$  ( $m = 1, 3, 5, 7,$  and 9). We set the default parametric values  
744 as  $k = 4, \lambda = 1,$  and  $m = 1$  when varying across the settings of these parameters  
745 respectively. The black texts are the  $p$ -value of the statistical significance of this

746 average similarity derived from the Wilcoxon rank-sum test.  $p$ -value  $< 0.05$  denotes  
 747 the statistical significance of this average similarity (significantly not equal to 0).

748

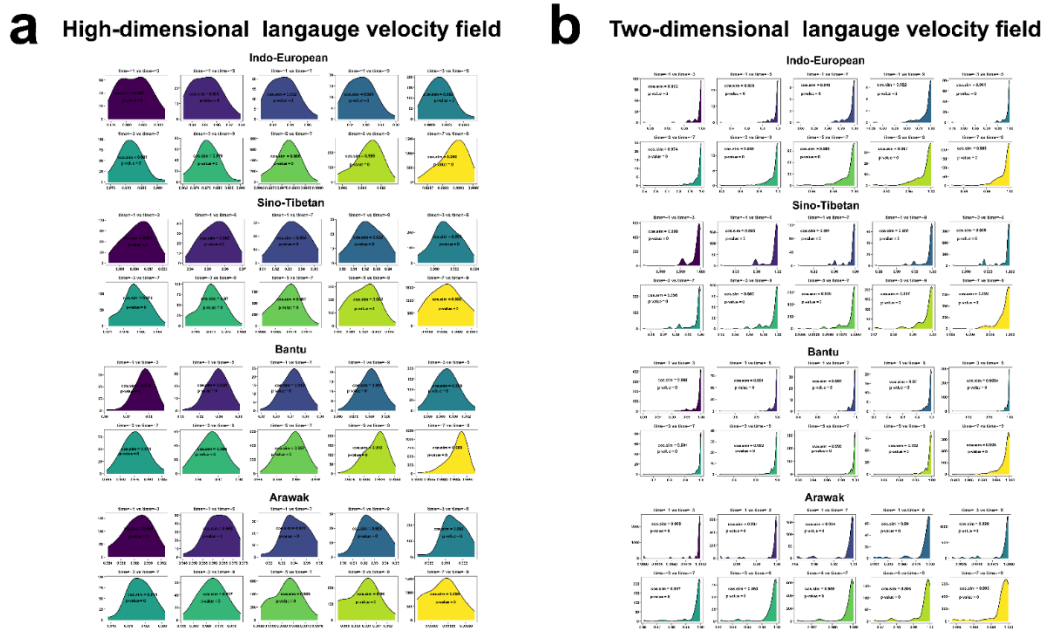

749

750 **Figure 3 to Q18. The empirical validation for the robustness of the language**  
 751 **velocity field estimation (LVF) against the setting of the reconstruction time.** The  
 752 probability density plot demonstrates the distribution of the cosine similarity among  
 753 the language velocity vectors calculated under different settings of reconstruction time  
 754  $m$  ( $m = 1, 3, 5, 7,$  and  $9$ ) before the current time in four language families and groups.  
 755 We set the default parametric values as  $k = 10$  and  $\lambda = 1$  when varying across the  
 756 settings of  $m$ . The black texts are the average similarity of the distribution of  
 757 similarity and the  $p$ -value of the statistical significance of this average similarity  
 758 derived from the permutation test (Permutation Times = 500). The average similarity  
 759 ranges from 0 to 1, where 1 denotes that these two velocity fields are most similar and  
 760 0 is dissimilar.  $p$ -value  $< 0.05$  denotes the statistical significance of the average  
 761 similarity.

762 **Reference**

763 [1] Zhang, Menghan, et al. "Phylogenetic evidence for Sino-Tibetan origin in  
 764 northern China in the Late Neolithic." Nature 569.7754 (2019): 112-115.

765 [2] Chang, Will, et al. "Ancestry-constrained phylogenetic analysis supports the  
766 Indo-European steppe hypothesis." *Language* (2015): 194-244.

767

768 *Q19. I do not understand the physical meaning of this vectorial framework because*  
769 *no clear explanation is provided.*

770 **Replies to Q19:**

771 To provide a clearer explanation of our approach, we have added more detailed  
772 explanations of our approach in the revised main text (*Lines 109-151*). Moreover, we  
773 have also added detailed mathematical formulas of our approach in the [Materials and](#)  
774 [Methods](#) section. As the supplementary, we have also redrawn the schematic diagram  
775 presented as [Figure 1 to Q19](#) (also referred to as [Figure 1](#) in the revised main text) to  
776 visually elucidate the rationale and calculation procedure of our approach.

777 **Our approach shares the same theoretical foundation as the phylogeographic**  
778 **approach but with different implementation strategies.** As the most prevailing  
779 approach, the phylogeographic approach performs two major steps to infer language  
780 dispersal patterns. The first is to obtain a phylogenetic tree to delineate the  
781 evolutionary trajectories of linguistic traits that shape the observed linguistic  
782 relatedness ([Figure 2 to Q19](#)) [1-3]. The second is to project the phylogenetic tree into  
783 the geographic space based on the correlation between linguistic relatedness and  
784 language geography ([Figure 2 to Q19](#)) [1-4]. With the projection, evolutionary  
785 trajectories of linguistic traits can be transformed into language dispersal trajectories.  
786 Our approach shares the similar two major steps as the phylogeographic approach that  
787 infers language dispersal through the diachronic evolution of linguistic traits ([Figure 2](#)  
788 [to Q19](#)). However, our approach employs different strategies to carry out these two  
789 steps compared to the phylogeographic approach.

790 **The velocity field in PC space delineates the diachronic evolutionary**  
791 **trajectories of linguistic traits that shape the observed linguistic relatedness.** Our  
792 approach conducts the PCA-based distance rather than a phylogenetic tree to  
793 represent linguistic relatedness. Specifically, the PCA algorithm is conducted to  
794 rearrange the lexical traits into two principal components namely PC1 and PC2.  
795 According to PC1 and PC2, the distribution of language samples can be visualized in

796 the PC space. The shorter distances among language samples in the PC space imply  
797 their higher linguistic relatedness. In parallel, the language velocity vector is  
798 estimated to demonstrate the direction of the average change of trait states for each  
799 language sample in a unit of time. With the past trait states reconstructed by the  
800 dynamic model, the velocity vector can be calculated by dividing the diachronic  
801 changes in trait states of each language sample by the  $m$  unit of time. This velocity  
802 vector depicts how the linguistic traits in a language sample evolve into their current  
803 states. By mapping these velocity vectors into the PC space, a language velocity field  
804 can be derived on the PC space to delineate the diachronic evolutionary trajectories of  
805 linguistic traits that shape the observed linguistic relatedness. This velocity field in PC  
806 space functions similarly to the phylogenetic tree in the phylogeographic approach.

807 **Projecting velocity field into geographic space to transform the evolutionary**  
808 **trajectories of linguistic traits into the language dispersal trajectories.** Based on  
809 the correlation between observed linguistic relatedness and language geography, we  
810 further project each velocity vector from PC space into geographic space utilizing  
811 kernel projection [3]. The rationale of this projection is to search for the velocity  
812 vector in the geographic space ensuring that its correlation with language geography  
813 closely matches with its correlation with linguistic relatedness. With the kernel  
814 projection, the vector directions in the geographic space, which compose a set of  
815 trajectories, render from where the observed language samples diffuse into their  
816 current locations. This geographic projection of the velocity field is similar to the  
817 projection of the phylogenetic tree into the geographic space to outline the dispersal  
818 trajectories in the phylogeographic approach.

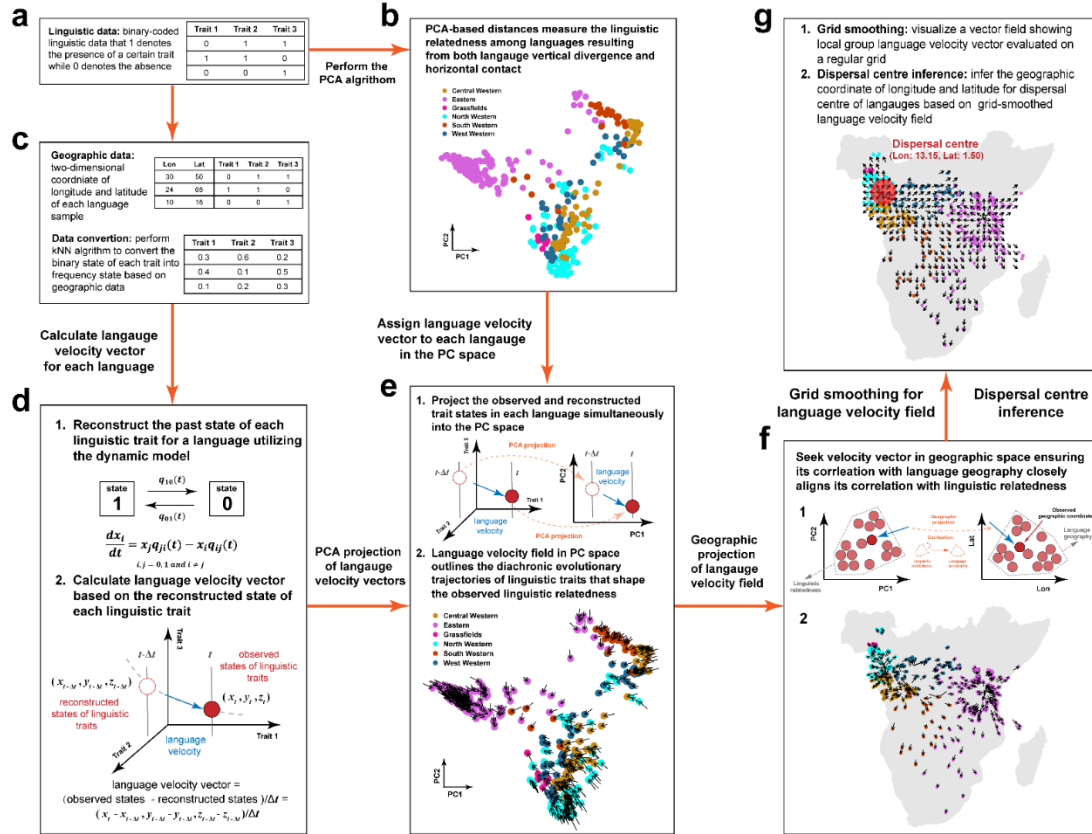

819

820 **Figure 1 to Q19. Schematic overview of the language velocity field estimation**  
 821 **(LVF) for inferring the dispersal trajectories and centers of languages.** The  
 822 computational procedures of the LVF comprise two major steps. Subfigures (a) to (e)  
 823 illustrate the first step which is to estimate a velocity field on the PC space to outline  
 824 the diachronic evolutionary trajectories of linguistic traits that shape the observed  
 825 linguistic relatedness. Subfigures (f) to (g) illustrate the second step, which is to  
 826 project the velocity field from PC space into geographic space. Within the velocity  
 827 field in geographic space, the directions of the velocity vectors compose a set of  
 828 continuously changing trajectories that delineate from where these languages diffuse  
 829 to their current locations. These procedures are exemplified using the Bantu language  
 830 family. Comprehensive insights into the underlying principles and computational  
 831 steps can be found in the [Materials and Methods](#) section, as well as [Supplementary](#)  
 832 [Note 1](#).

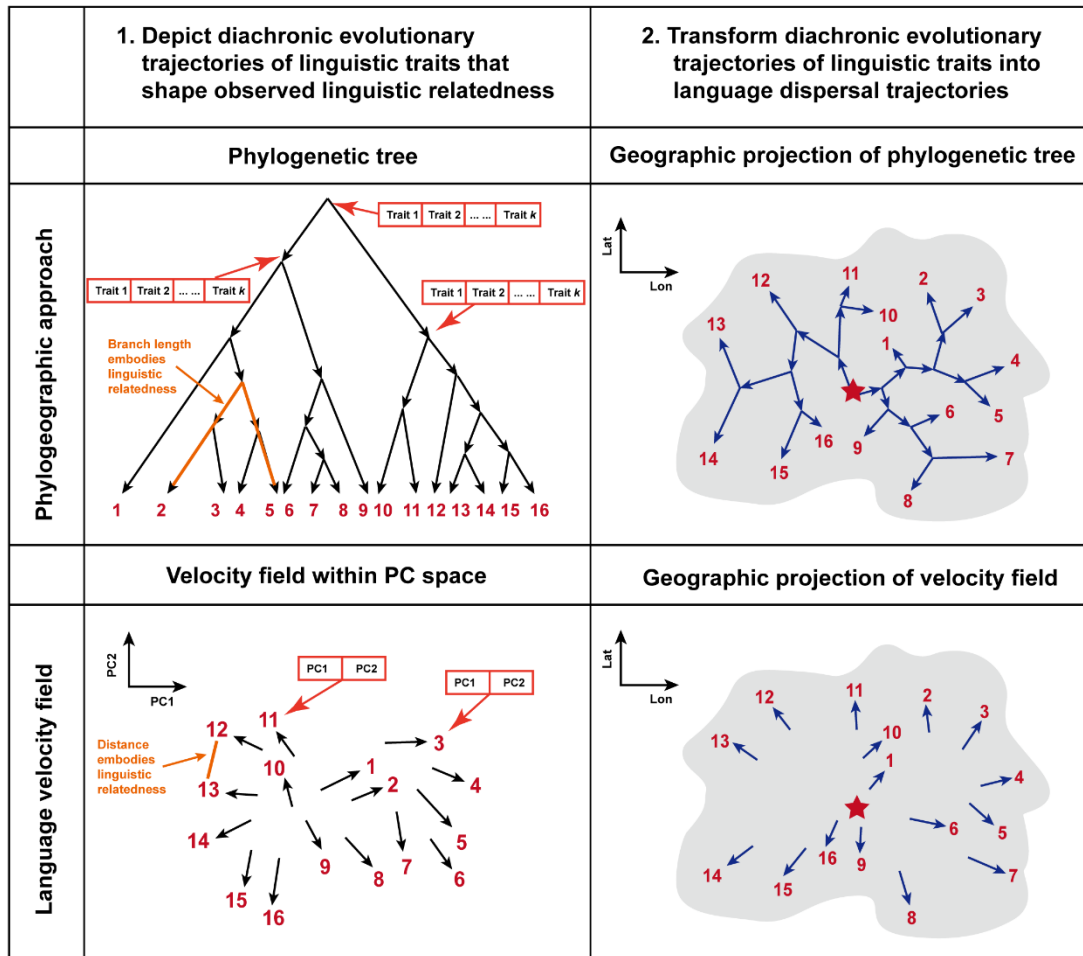

833

834 **Figure 2 to Q19. Language velocity field estimation (LVF) shares the same**  
835 **foundation as the phylogeographic approach but with different implementation**  
836 **strategies.** Both LVF and phylogeographic approach entails two major steps to infer  
837 language dispersal pattern. The first is to depict the diachronic evolutionary  
838 trajectories of linguistic traits that shape the observed linguistic relatedness. The  
839 second is to transform these diachronic evolutionary trajectories of linguistic traits  
840 into language dispersal trajectories. In the phylogenetic tree, each language is  
841 determined by  $k$  linguistic traits. In the velocity field within PC space, each language  
842 is determined by PC1 and PC2 which are rearranged from the  $k$  linguistic traits  
843 through the PCA algorithm. The red number denotes a language. The black arrow  
844 signifies the evolutionary direction of linguistic traits in a language. The blue arrow  
845 represents the dispersal direction of a language. The red star denotes the estimated  
846 dispersal center.

847 **Reference**



848 [1] Bouckaert, Remco, et al. "Mapping the origins and expansion of the  
849 Indo-European language family." *Science* 337.6097 (2012): 957-960.

850 [2] Grollemund, Rebecca, et al. "Bantu expansion shows that habitat alters the route  
851 and pace of human dispersals." *Proceedings of the National Academy of Sciences*  
852 112.43 (2015): 13296-13301.

853 [3] Currie, Thomas E., et al. "Cultural phylogeography of the Bantu Languages of  
854 sub-Saharan Africa." *Proceedings of the Royal Society B: Biological Sciences*  
855 280.1762 (2013): 20130695.

856 [4] Koile, Ezequiel, et al. "Geography and language divergence: The case of Andic  
857 languages." *Plos one* 17.5 (2022): e0265460.

858 [5] La Manno, Gioele, et al. "RNA velocity of single cells." *Nature* 560.7719 (2018):  
859 494-498.

860

861 *Q20: the authors said that they study the spatial dispersal of languages along*  
862 *10,000 years, to my understanding the vector field describes the change of the*  
863 *language between one exact moment of the past and  $t=0$ , which is supposed to be*  
864 *today.*

865 **Replies to Q20:**

866 We are grateful for the reviewer's comments. The reason why we mentioned  
867 10,000 years in the main text is that all four language families and groups utilized in  
868 this study originated within the last 10,000 years. For the Indo-European languages,  
869 different phylogenetic studies have reported that their origin time could be either  
870 approximately 8,000 to 9,500 years ago [1] or approximately 6,000 years ago [2]. For  
871 the Sino-Tibetan languages, its initial divergence has been estimated to occur between  
872 4,000 to 8,000 years ago [3-5]. The origin of the Bantu languages has been traced  
873 back to roughly 5,000 years ago [6]. Although the detailed origin time of the Arawak  
874 languages remains unclear, its origin is interlinked with the agricultural advancement  
875 in lowland South America around 5,000 years ago [7-8]. Consequently, the origin of  
876 Arawak languages should have dated at most 5,000 years ago. Overall, 10,000 years

877 is the upper limit of the origin time for these four language families and groups.

878 **Reference**

879 [1] Bouckaert, Remco, et al. "Mapping the origins and expansion of the  
880 Indo-European language family." *Science* 337.6097 (2012): 957-960.

881 [2] Chang, Will, et al. "Ancestry-constrained phylogenetic analysis supports the  
882 Indo-European steppe hypothesis." *Language* (2015): 194-244.

883 [3] Zhang, Menghan, et al. "Phylogenetic evidence for Sino-Tibetan origin in  
884 northern China in the Late Neolithic." *Nature* 569.7754 (2019): 112-115.

885 [4] Zhang, Hanzhi, et al. "Dated phylogeny suggests early Neolithic origin of  
886 Sino-Tibetan languages." *Scientific Reports* 10.1 (2020): 20792.

887 [5] Sagart, Laurent, et al. "Dated language phylogenies shed light on the ancestry of  
888 Sino-Tibetan." *Proceedings of the National Academy of Sciences* 116.21 (2019):  
889 10317-10322.

890 [6] Grollemund, Rebecca, et al. "Bantu expansion shows that habitat alters the route  
891 and pace of human dispersals." *Proceedings of the National Academy of Sciences*  
892 112.43 (2015): 13296-13301.

893 [7] Diamond, Jared, and Peter Bellwood. "Farmers and their languages: the first  
894 expansions." *Science* 300.5619 (2003): 597-603.

895 [8] Clement, Charles Roland, et al. "Crop domestication in the upper Madeira River  
896 basin." *Boletim do Museu Paraense Emílio Goeldi. Ciências Humanas* 11 (2016):  
897 193-205.

898 **Replies to Reviewer 2:**

899 *Q1: As I stated in my previous reviews of this paper, it is interesting, convincing,*  
900 *and historically significant in its conclusions. I am pleased to see that the authors*  
901 *have cut down the paper to deal with the four clearest examples, these being*  
902 *Indo-European, Sino-Tibetan, Bantu, and Arawak. The more troublesome*  
903 *Austroasiatic, Japonic and Oceanic examples have been removed, and I think this*  
904 *decision has added greatly to the clarity of the paper. It deserves to be published in*  
905 *Nature Communications. My first comment is that the paper still needs a light level*  
906 *of English editing. I do not have time to do this on behalf of the authors, but*  
907 *perhaps I can use the abstract as an example of how some light editing might*  
908 *increase its clarity:*

909 **Replies to Q1:**

910 We are deeply grateful for the reviewer's great support and affirmation of our  
911 work. Moreover, we also would like to express our sincere appreciation for the  
912 reviewer personally revising our abstract. According to this valuable example of  
913 revision, we have carefully revised our manuscript. This revision involves correcting  
914 many typos and grammatical errors, and rephrasing some lengthy and vague sentences.  
915 Moreover, we also engaged the AJE language editing service to thoroughly edit the  
916 language of our manuscript (ID: Q2K9ZRSF). We expect that our revisions could  
917 enhance the readability and clarity of our manuscript for native English speakers.

918

919 *Q2: Figure 2 shows the proposed agricultural homeland in northern Amazonia for*  
920 *Arawak. This conflicts with text lines 184-186, where it is stated that " In addition,*  
921 *the language velocity field posited the dispersal of Arawak languages originated*  
922 *from the border of Peru, Brazil, and Bolivia in Western Amazonia, which was*  
923 *geographically close to the known ancient agricultural homeland of South America*  
924 *in the Andes". This statement implies a homeland much further to the south than*  
925 *shown on the map, which is what the archaeology would suggest. The map shows*  
926 *an area too far north. I note in Supplementary Notes 1 Table S2 that the Arawak*  
927 *homeland is put in the northern lowlands of Bolivia (upper Madeira River), which*  
928 *is precisely where I would expect it to be!*

929 **Replies to Q2:**

930 We are sincerely grateful for the reviewer to point these out. According to the  
931 reviewer's suggestions, we found inaccuracies in our descriptions regarding the origin  
932 of Arawak languages near the Andes, since their estimated dispersal center was indeed  
933 located too far from the Andes foothills. As mentioned by the reviewer, the dispersal  
934 center of Arawak languages estimated by our approach is located in the upper  
935 Madeira River basin within the northern lowlands of Bolivia. Accordingly, we further  
936 made some literature investigations about the upper Madeira River basin.

937 To our knowledge, the Madeira River rises from the Andes and flows through a  
938 larger part of the Southwestern Amazonian [1]. The upper Madeira River basin, which  
939 has raised numerous complex Neolithic Societies, has long been regarded as an  
940 important homeland of ancient agriculture in lowland South America [2]. In this area,  
941 plenty of crops have been domesticated, such as manioc, peanuts, peach palms, coca,  
942 and tobacco. It is noted that the estimated dispersal center of the Arawak language is  
943 located in the upper Madeira River basin. This estimation implies that the Arawak  
944 language origin is associated with the agricultural origin in Southwestern Amazonian.  
945 Accordingly, we revise the sentences of *Lines 184-186* in the original main text into:  
946 *"In addition, the LVF showed the dispersal of Arawak languages originating from*  
947 *the northern lowlands of Bolivia in the upper Madeira River basin, which is an*  
948 *important homeland of ancient agriculture in lowland South America."* as shown in  
949 *Lines 202-204* of the revised main text.

950 **Reference**

951 [1] Clement, Charles Roland, et al. "Crop domestication in the upper Madeira River  
952 basin." *Boletim do Museu Paraense Emílio Goeldi. Ciências Humanas* 11 (2016):  
953 193-205.

954 [2] Piperno, Dolores R. "The origins of plant cultivation and domestication in the  
955 New World tropics: patterns, process, and new developments." *Current anthropology*  
956 52.S4 (2011): S453-S470.

957

958 *Q3: Likewise, lines 187-189 state " Moreover, in the case of Sino-Tibetan*  
959 *languages, their dispersal center was inferred in the Gansu province of China*  
960 *(Figure 2b). It was approximate to the geographic ranges of the Yangshao*  
961 *(7,000-5,000 years BP) and/or Majiayao (5,500-4,000 years BP) Neolithic cultures,*  
962 *although it was far from the ancient agricultural homelands known in the Yangzi*  
963 *and Yellow River Basins of China." Surely, Yangshao and Majiayao were centrally*  
964 *located in the Yellow River homeland of millet and pig agriculture? I cannot*  
965 *understand what is meant here, although, of course, the Yangzi is a different matter.*

966 **Replies to Q3:**

967 We greatly appreciate the reviewer for bringing these points out. The original  
968 intention of our statement was to express that the dispersal and origin of Sino-Tibetan  
969 languages appear to have stronger connections with the agriculture that originated in  
970 the Yellow River basin rather than the Yangzi River basin.

971 Early farming in China can be divided into two distinct attributes. One originated  
972 in the Yellow River basin with a focus on millet cultivation, while another one was  
973 developed in the Yangzi River basin with a focus on rice cultivation [1].  
974 Geographically located in the center of the Yellow River basin, Yangshao, and  
975 Majiayao Neolithic cultures were predominantly engaged in millet cultivation, as  
976 evidenced by the archaeological materials [2-3]. Therefore, the estimated  
977 Sino-Tibetan language dispersal center located in the geographic ranges of Yangshao  
978 and Majiayao Neolithic cultures indicates that the Sino-Tibetan languages could have  
979 dispersed with the spread of millet from the Yellow River basin rather than the Yangzi  
980 River basin.

981           However, according to the reviewer’s suggestion, we think that it is not necessary  
982 to mention the agriculture in the Yangzi River basin in this study which is not relevant  
983 to the case of Sino-Tibetan languages. The agriculture in Yangzi River should be  
984 another story in another research. Accordingly, we have revised the sentences in *Lines*  
985 *187-189* of the original main text as: “***Moreover, in the case of Sino-Tibetan***  
986 ***languages, their dispersal centre was inferred to be located in the Gansu Province***  
987 ***of China (Figure 2b). This centre is situated within the geographic ranges of the***  
988 ***Yangshao (7,000-5,000 years BP) and/or Majiayao (5,500-4,000 years BP) Neolithic***  
989 ***cultures 6 in the ancient agricultural homeland of China, the Yellow River plains.***”  
990 in the *Lines 195-198* of the revised main text.

## 991 **Reference**

992 [1] Deng, Zhenhua, et al. "From early domesticated rice of the middle Yangtze Basin  
993 to millet, rice and wheat agriculture: Archaeobotanical macro-remains from Baligang,  
994 Nanyang Basin, Central China (6700–500 BC)." *PLoS One* 10.10 (2015): e0139885.

995 [2] Sagart, Laurent, et al. "Dated language phylogenies shed light on the ancestry of  
996 Sino-Tibetan." *Proceedings of the National Academy of Sciences* 116.21 (2019):  
997 10317-10322.

998 [3] Zhang, Menghan, et al. "Phylogenetic evidence for Sino-Tibetan origin in  
999 northern China in the Late Neolithic." *Nature* 569.7754 (2019): 112-115.

1000

1001 *Q4: The discussion from lines 197 to 298 is highly technical, and I have no*  
1002 *observations on it. Much the same applies to the materials and methods section. I*  
1003 *can understand from lines 301-9 that the basic data come from a geographical*  
1004 *plotting of cognate presences and absences, but I was puzzled by the statement*  
1005 *(lines 304-6) "Lexical cognates of these language samples in each language family*  
1006 *or group were binary-coded traits..." This sentence seems to confuse the concepts of*  
1007 *cognate and language. How many cognate terms were used in the analysis, and*  
1008 *from which proto-language levels were these cognates derived? In other words, how*  
1009 *was a cognate defined? This might be explained in the supplementary data, but I*  
1010 *think it should be clearer here in the main text.*

1011 **Replies to Q4:**

1012 We appreciate these valuable comments. In this study, we have used four lexical  
1013 datasets encompassing 103 Indo-European, 109 Sino-Tibetan, 420 Bantu, and 60  
1014 Arawak languages, respectively, which were derived from previously published works  
1015 [1-4]. These lexical datasets are constructed upon the foundation of cognates (also  
1016 referred to as cognate sets) which are varied word expressions for a particular lexical  
1017 item (meaning) across diverse languages. These linguistic expressions (cognates) for  
1018 the same lexical item have been identified as being inherited from a common ancestor.  
1019 Within each lexical dataset, every linguistic expression (cognate) has been recorded as  
1020 a binary lexical trait, where a value of 1 indicates its presence in a language, while 0  
1021 indicates its absence.

1022 To be specific, for the Indo-European lexical dataset, Bouckaert et al. compiled  
1023 207 lexical items [1] which facilitated the identification of 5,995 lexical cognates  
1024 across 103 Indo-European languages. These cognates were further recoded into 5,995  
1025 binary-coded lexical traits. Bouckaert et al. described their cognate coding process as  
1026 follows: "*We recorded word forms and cognacy judgments across 207 meanings in*  
1027 *103 contemporary and ancient languages.... Cognate data were coded as binary*  
1028 *characters showing the presence or absence of a cognate set in a language. There*  
1029 *were 5995 cognate sets in total, with most meanings represented by several different*  
1030 *cognate sets. All cognate coding decisions were checked with published historical*  
1031 *linguistic sources (Table S1). The database contained 25908 cognate-coded lexemes.*  
1032 *Of these, 67% came originally from ref. (17 ), 14% from ref. (16 ), and 19% were*  
1033 *newly compiled from published sources. Ref. (17 ) required considerable correction,*

1034 *and changes were made to approximately 26% of coding decisions on individual*  
1035 *lexemes. Ref. (16 ) required corrections to only 0.5% of lexemes.”.*

1036 For the Sino-Tibetan lexical dataset, Zhang et al. compiled 90 lexical items from  
1037 the *Sino-Tibetan Etymological Dictionary and Thesaurus* (STEDT) project [5]. These  
1038 lexical items can be also found in *Swadesh’s 100-word list* [6]. These chosen lexical  
1039 items led to the detection of 949 cognates across 109 Sino-Tibetan languages, which  
1040 were then encoded as 949 binary-coded lexical traits. Zhang et al. described their  
1041 cognate coding process as below: “*The lexical root-meanings used in this study came*  
1042 *from the Sino-Tibetan Etymological Dictionary and Thesaurus (STEDT) project1,*  
1043 *which was developed by a number of experienced historical linguists led by James A.*  
1044 *Matisoff over a 30-year period (URL: <http://stedt.berkeley.edu/>).....To minimize the*  
1045 *word lateral transfers, in this study we chose only the words with meaning inside the*  
1046 *Swadesh 100-word list since they are relatively resistant to borrowing2.....In order*  
1047 *to make sure that all the languages were comparable to each other, we filtered only*  
1048 *those languages with at least 90 lexical meanings of the Swadesh 100-word list*  
1049 *recorded (no matter whether an RM exists) and 30 – 120 RMs.....Finally, we*  
1050 *retained 109 ST language samples with 949 binary-coded lexical RMs for further*  
1051 *phylogenetic analyses.”*

1052 For the Bantu lexical dataset, Grollemund et al. selected 100 lexical items from  
1053 the *Atlas Linguistique du GABon list* [7], of which 68 lexical items overlap with  
1054 *Swadesh’s 100-word list*. According to these lexical items, they recognized 3,859  
1055 cognates across 420 Bantu languages. These cognates were further transformed into  
1056 3,859 binary-coded lexical traits. Grollemund described their cognate coding process  
1057 as: “*For phylogenetic inference, we used a selection of 100 meanings comprising a*  
1058 *modified version of the Atlas Linguistique du GABon list (52). The Atlas includes 159*  
1059 *meanings, and our sample of 100 meanings are those that are best documented for the*  
1060 *languages we studied.....We identified 3,859 cognate sets across the n = 100*  
1061 *meanings. These were coded as binary characters for purposes of phylogenetic*  
1062 *analysis.”*

1063 For the Arawak lexical dataset, Walker et al. compiled *Swadesh’s 100-word list*  
1064 and identified 694 cognates across 60 Arawak languages. Subsequently, these  
1065 cognates were then recoded as 694 binary-coded lexical traits. Walker et al. described  
1066 their cognate coding process as below: “*We compiled Swadesh [20] lists of 100*



1067 *common vocabulary items and scored cognate sets across 60 Arawak languages and*  
1068 *dialects representing all the major branches of the Arawak language family (see*  
1069 *electronic supplementary material, table S1).....We transformed coded cognates into*  
1070 *binary codes for each variant with sites representing whether any particular cognate*  
1071 *set is present ('1') or absent ('0') in that language..... The method yields 694 sites of*  
1072 *which 88 per cent are complete.”*

1073 According to the reviewer’s suggestions, we have revised the corresponding  
1074 contents as shown in the *Lines 373-382* of the revised main text.

1075 **Reference**

1076 [1] Bouckaert, Remco, et al. "Mapping the origins and expansion of the  
1077 Indo-European language family." *Science* 337.6097 (2012): 957-960.

1078 [2] Zhang, Menghan, et al. "Phylogenetic evidence for Sino-Tibetan origin in  
1079 northern China in the Late Neolithic." *Nature* 569.7754 (2019): 112-115.

1080 [3] Grollemund, Rebecca, et al. "Bantu expansion shows that habitat alters the route  
1081 and pace of human dispersals." *Proceedings of the National Academy of Sciences*  
1082 112.43 (2015): 13296-13301.

1083 [4] Walker, Robert S., and Lincoln A. Ribeiro. "Bayesian phylogeography of the  
1084 Arawak expansion in lowland South America." *Proceedings of the Royal Society B:*  
1085 *Biological Sciences* 278.1718 (2011): 2562-2567.

1086 [5] Matisoff, James A. "Sino-Tibetan etymological dictionary and thesaurus  
1087 (STEDT)." Berkeley: Sino-Tibetan Etymological Dictionary and Thesaurus  
1088 Project.(stedt.berkeley.edu/dissemination/STEDT.pdf)[accessed on 18 October 2020]  
1089 (2015).

1090 [6] Swadesh, Morris. "Towards greater accuracy in lexicostatistic dating."  
1091 *International journal of American linguistics* 21.2 (1955): 121-137.

1092 [7] Hombert, Jean-Marie. "Atlas linguistique du Gabon." *Revue gabonaise des*  
1093 *Sciences de l'homme* 2 (1990): 37-42.

1094

1095 *Q5: Lines 449-40 state: "The diversity approach is an alternative phylogenetic*  
1096 *tree-free approach and simply infers the location of the language homeland to the*  
1097 *areas with the highest linguistic diversity." What is meant here by linguistic*  
1098 *diversity? Does it relate to relative times of splitting from an inferred phylogenetic*  
1099 *family tree? (i.e., deeper-splitting subgroups are older)? I presume it is not simply*  
1100 *related to number of languages.*

1101 **Replies to Q5:**

1102 We are sorry for the lack of clarity regarding the definition of linguistic diversity.  
1103 As the reviewer correctly mentioned, linguistic diversity is not determined solely by  
1104 the number of languages. As described by Wichmann and Sapir [1-3], the level of  
1105 linguistic diversity is determined by the degree of differentiation among languages  
1106 within a specific geographical area. Higher linguistic diversity indicates greater  
1107 dissimilarities among the languages within that region. Consequently, even if there is  
1108 a large number of languages in a particular geographic area, the linguistic diversity  
1109 might still be low if those languages do not exhibit significant distinctions with each  
1110 other.

1111 The traditional diversity approach does not directly involve the divergence time  
1112 provided by the phylogenetic tree for calculation. It simply measures the degree of  
1113 distinctions among the observed languages (i.e., linguistic diversity) and assumes that  
1114 the homeland of languages should be located in the area possessing the largest  
1115 linguistic diversities [3]. Nevertheless, the theoretical foundation of this approach is  
1116 somewhat related to the divergence time as the reviewer mentioned. In short, the  
1117 diversity approach assumes that early divergence exhibits a higher divergence rate,  
1118 which subsequently leads to the birth of an extraordinary number of distinct languages  
1119 around the language homeland [3]. However, this theoretical underpinning has always  
1120 been criticized because no solid evidence has been proposed to link divergence rate  
1121 and homeland location. Additionally, other population activities, such as the migration  
1122 of native speakers out of their original homeland, could also alter the linguistic  
1123 diversity of the language homeland [4].

1124 Following the reviewer's suggestions, we have added more detailed descriptions  
1125 of the linguistic diversity approach in *Lines 308-311* of the revised main text.  
1126 Moreover, a more comprehensive discussion of the linguistic diversity approach can

1127 be found in [Supplementary Note 2: Section 2](#).

1128 **Reference**

1129 [1] Sapir, Edward. Time perspective in aboriginal American culture: a study in  
1130 method. No. 13. Government Printing Bureau, 1916.

1131 [2] Wichmann, Søren, and Taraka Rama. "Testing methods of linguistic homeland  
1132 detection using synthetic data." *Philosophical Transactions of the Royal Society B*  
1133 376.1824 (2021): 20200202.

1134 [3] Wichmann, Søren, André Müller, and Viveka Velupillai. "Homelands of the  
1135 world's language families: A quantitative approach." *Diachronica* 27.2 (2010):  
1136 247-276.

1137 [4] Neureiter, Nico, et al. "Can Bayesian phylogeography reconstruct migrations and  
1138 expansions in linguistic evolution?." *Royal Society open science* 8.1 (2021): 201079.

1139

1140 *Q6: I noticed in Supplementary Note 1 that phylogenetic discussions of*  
1141 *Austroasiatic, Japonic and Oceanic are still mentioned, even through these*  
1142 *groupings are no longer discussed in the main text.*

1143 **Replies to Q6:**

1144 We express our appreciation to the reviewer for bringing these points to our  
1145 attention. In the revision, we have deleted the discussions related to the Austroasiatic,  
1146 Japonic, and Oceanic languages in [Supplementary Note 1](#).

1147

1148 *Q7: Supplementary Notes 2: it is not clear to me that Supplementary sections 2 and*  
1149 *3 are really necessary (The interdisciplinary alignment of Genetics, Archaeology,*  
1150 *and Linguistics; The Age-Area Hypothesis for inferring the language homeland). I*  
1151 *think the observations made in this paper can stand quite well without them.*

1152 **Replies to Q7:**

1153        We sincerely appreciate the reviewer's suggestions. Following these suggestions,  
1154 we have made several revisions to the [main text](#) and [Supplementary Note 2](#). To be  
1155 specific, we have excluded [Section 3](#) (i.e., The Interdisciplinary Alignment of  
1156 Genetics, Archaeology, and Linguistics) from [Supplementary Note 2](#). After careful  
1157 consideration, we have decided to retain [Section 2](#) within [Supplementary Note 2](#). This  
1158 decision is motivated by the fact that the diversity approach is another famous  
1159 phylogeny-free approach for identifying the language dispersal center. In our study,  
1160 we have undertaken empirical comparisons between our approach and this  
1161 methodology. As a result, [Section 2](#) of [Supplementary Note 2](#) offers an invaluable  
1162 complement to the main text, providing readers with a more comprehensive grasp of  
1163 the underlying rationale and limitations of the diversity approach.

1164

1165

1166 **Replies to Reviewer 3:**

1167 *Q1: I find this study generally quite interesting, since the authors claim that they*  
1168 *have developed a new method that allows to represent historical dynamics of*  
1169 *individual languages in comparison with neighboring languages by*  
1170 *multidimensional vectors, which can then be projected in lower-dimensional space*  
1171 *in order to even infer the original locations from which the language family as a*  
1172 *whole dispersed. While interesting, I see some general problems with the study,*  
1173 *mainly its fit with the journal where it was submitted to, and as a result, I*  
1174 *recommend it to be rejected -- not because it is too low in quality, but rather because*  
1175 *it is not a good fit with the journal, as I'll explain below. Apart from this, I see some*  
1176 *major and minor flaws, which I'll discuss below. First, regarding the fit of the*  
1177 *approach: What the authors propose is a methodological study, a new methodology*  
1178 *of which they claim it outperforms established -- albeit controversial -- methods. In*  
1179 *such a case, the journal where they submitted their study to, does not really qualify*  
1180 *as a good fit, since we do not deal with new findings (they cannot be made until the*  
1181 *method has been thoroughly evaluated) but rather with a new method that needs to*  
1182 *be shown to work. For this reason, I think some journal like "Nature Methods"*  
1183 *would be a much better fit here.*

1184 **Replies to Q1:**

1185 We are genuinely grateful for the reviewer's recommendation regarding the  
1186 potential fit of our manuscript with *Nature Methods*, which is another outstanding  
1187 Nature-branded journal renowned for its specialization in novel methods. Nonetheless,  
1188 we firmly maintain our conviction that our work is ideally suited for *Nature*  
1189 *Communications*.

1190 Firstly, *Nature Communications* stands as a top-rank multidisciplinary journal  
1191 that is devoted to publishing high-quality research in all interdisciplinary areas. Apart  
1192 from reporting novel discoveries, it also has published many papers that propose  
1193 novel methods to address interesting scientific questions. Specifically, diverse  
1194 velocity field-based methods applicable to various research fields have been published  
1195 in *Nature Communications*. These velocity fields have contributed to inferring the  
1196 trajectories of dynamic changes in natural and social systems such as single-cell  
1197 differentiation [1-2], human mobility [3], and atmospheric circulation [4].

1198 Accordingly, we think that our paper, which proposes a novel velocity field-based  
1199 method to infer the language dispersal trajectory, is also suitable to the aim and scope  
1200 of *Nature Communications*.

1201 Secondly, although our paper presents a new computational approach, its essence  
1202 remains firmly rooted in multidisciplinary exploration. Our study seeks to investigate  
1203 the spatial alignment of linguistic, genetic, and archaeological evidence in  
1204 reconstructing prehistoric population activities worldwide. We believe that this topic  
1205 could spark broad interest among researchers devoted to the interdisciplinary studies  
1206 of human prehistory. It should also meet the aim and scope of *Nature*  
1207 *Communications*.

1208 **Reference:**

1209 [1] Gao, Mingze, Chen Qiao, and Yuanhua Huang. "UniTVelo: temporally unified  
1210 RNA velocity reinforces single-cell trajectory inference." *Nature Communications*  
1211 13.1 (2022): 6586.

1212 [2] Riba, Andrea, et al. "Cell cycle gene regulation dynamics revealed by RNA  
1213 velocity and deep-learning." *Nature Communications* 13.1 (2022): 2865.

1214 [3] Mazzoli, Mattia, et al. "Field theory for recurrent mobility." *Nature*  
1215 *communications* 10.1 (2019): 3895.

1216 [4] Sohn, Byung-Ju, et al. "Regulation of atmospheric circulation controlling the  
1217 tropical Pacific precipitation change in response to CO2 increases." *Nature*  
1218 *communications* 10.1 (2019): 1108.

1219

1220 *Q2: Second, if the authors accept that they need to convince us first that their*  
1221 *method is useful and will enlarge our future knowledge about the spread of*  
1222 *language families over time, they should please provide their method in a way that*  
1223 *it can be replicated. As of now, we have a bunch of unrelated, badly documented*  
1224 *R-scripts in a folder of 600 MB, that are hard to read and even harder to*  
1225 *understand. Where is the vector estimation happening, what is the k you choose for*  
1226 *the k-means languages that you select as neighbors, what is the impact of k on your*  
1227 *results, etc. It makes me extremely nervous to see such a huge bunch of barely*  
1228 *commented R-scripts that often do the same, but bear another name of another*  
1229 *language family. This is definitely not how you make a new method successful. The*  
1230 *least we would expect is a package in R with a tutorial that runs us through your*  
1231 *code, for one language family, and then an extended tutorial with all four language*  
1232 *families.*

1233 **Replies to Q2:**

1234 We are grateful for the reviewer's suggestion. It greatly enhances the readability  
1235 of our R codes and the convenience of the replications and utilizations of our  
1236 approach by other users. Following the reviewer's suggestions, we have built an R  
1237 package and provided some detailed tutorials on this package. Please see  
1238 [https://github.com/Stan-Sizhe-Yang/Language-velocity-field-estimation-for-language](https://github.com/Stan-Sizhe-Yang/Language-velocity-field-estimation-for-language-dispersal-pattern-inference)  
1239 [-dispersal-pattern-inference.](https://github.com/Stan-Sizhe-Yang/Language-velocity-field-estimation-for-language-dispersal-pattern-inference)

1240

1241 *Q3: Third, speaking of four, I hate to say this, but I was reviewing this study before,*  
1242 *not negatively, but pointing to the code, and to other issues. Interestingly, the*  
1243 *number of language families has now dropped from 7 to 4. How the heck did that*  
1244 *happen? How do the authors explain that they discard three language families now?*  
1245 *I know having the same reviewers for the same paper across journals is annoying,*  
1246 *but please, good scientific practice requires you to be transparent and tell us what*  
1247 *happened here. Did you discard them, because they did not bring the results you*  
1248 *hoped for?*

1249 **Replies to Q3:**

1250 We appreciate the reviewer for pointing this out. Moreover, we are deeply

1251 grateful for the reviewer to dedicate valuable personal time to review our manuscript  
1252 again. As mentioned by the reviewer, the previous version of our manuscript  
1253 contained seven cases: Sino-Tibetan, Indo-European, Bantu, Arawak, Japonic,  
1254 Austroasiatic, and Oceanic languages. However, for this version submitted to *Nature*  
1255 *Communications*, we have excluded three language cases: Japonic, Austroasiatic, and  
1256 Oceanic languages.

1257 **The primary reason for dropping three language cases.** We dropped these  
1258 three language cases due to the lack of language samples around their suggested  
1259 language homelands. To be specific, the proposed homelands of Indo-European,  
1260 Sino-Tibetan, Bantu, and Arawak languages are situated in geographic ranges where  
1261 sufficient language samples can be found [1-4]. However, there lack of sufficient  
1262 language samples within the geographic areas covering the suggested homelands of  
1263 Japonic (West Liao River of China [5-7]), Oceanic (Taiwan of China [6-8]), and  
1264 Austroasiatic (Southern China [6]) languages respectively. Due to the lack of  
1265 available language samples, it is nearly possible to determine the homelands of these  
1266 three language cases in China solely based on the geographic coordinates of their  
1267 language samples observed today. Accordingly, we can solely reconstruct the parts of  
1268 their complete dispersal histories. The estimated results of these three language cases  
1269 are described as follows.

1270 **The estimated results of three dropped language cases.** (i) The Japonic  
1271 languages are regarded as the branch of the Trans-Eurasian languages [5]. Our  
1272 approach traced their dispersal originating from the Honshu, followed by spread  
1273 northward and southward across Japan. This dispersal pattern is in accordance with  
1274 the expansion of the Trans-Eurasian languages from the Korean peninsula into Japan  
1275 archipelago [5-7]. (ii) The Oceanic languages are a branch of the Austronesian  
1276 languages [8]. We estimated their dispersal from the region near Southern Halmahera  
1277 Island with subsequent eastward expansion across the Pacific settlement. The  
1278 Southern Halmahera Island region is located at the easternmost edge of the  
1279 geographic range of Oceanic language samples. Therefore, the estimated Oceanic  
1280 dispersal pattern is compatible with the expansion of the Oceanic branch of the  
1281 Austronesian language in the Pacific settlement [6-8]. (iii) For the Austroasiatic  
1282 languages, our approach inferred their dispersal from the Mekong River region (one  
1283 of the agricultural homelands in Mainland Southeast Asia), with subsequent  
1284 expansion throughout Mainland Southeast Asia. This result favors the “Riverine



1285 hypothesis” proposed by Sidwell [9].

1286 Overall, due to a lack of sufficient language samples, the inferred dispersal  
1287 patterns of Japonic, Oceanic, and Austroasiatic languages can only reflect a portion of  
1288 their complete dispersal histories respectively. And, the estimated dispersal centers of  
1289 these languages may be the secondary centers that are formed after they diffused into  
1290 their current observed geographic ranges. Therefore, these three cases are unable to  
1291 depict the full picture of their corresponding language dispersal patterns and illustrate  
1292 the full power of our approach. More importantly, retaining these three language cases  
1293 in our manuscript would make our narrative less clear which would potentially  
1294 confuse the readers. In the version submitted to *Nature Communications*, we therefore  
1295 decided to drop these three more troublesome cases.

1296 **Reference:**

1297 [1] Bouckaert, Remco, et al. "Mapping the origins and expansion of the  
1298 Indo-European language family." *Science* 337.6097 (2012): 957-960.

1299 [2] Zhang, Menghan, et al. "Phylogenetic evidence for Sino-Tibetan origin in  
1300 northern China in the Late Neolithic." *Nature* 569.7754 (2019): 112-115.

1301 [3] Grollemund, Rebecca, et al. "Bantu expansion shows that habitat alters the route  
1302 and pace of human dispersals." *Proceedings of the National Academy of Sciences*  
1303 112.43 (2015): 13296-13301.

1304 [4] Walker, Robert S., and Lincoln A. Ribeiro. "Bayesian phylogeography of the  
1305 Arawak expansion in lowland South America." *Proceedings of the Royal Society B:  
1306 Biological Sciences* 278.1718 (2011): 2562-2567.

1307 [5] Robbeets, Martine, et al. "Triangulation supports agricultural spread of the  
1308 Transeurasian languages." *Nature* 599.7886 (2021): 616-621.

1309 [6] Diamond, Jared, and Peter Bellwood. "Farmers and their languages: the first  
1310 expansions." *science* 300.5619 (2003): 597-603.

1311 [7] Skoglund, Pontus, and Iain Mathieson. "Ancient genomics of modern humans:  
1312 the first decade." *Annual review of genomics and human genetics* 19 (2018): 381-404.

1313 [8] Gray, Russell D., Alexei J. Drummond, and Simon J. Greenhill. "Language  
1314 phylogenies reveal expansion pulses and pauses in Pacific settlement." *science*  
1315 323.5913 (2009): 479-483.

1316 [9] Paul, Sidwell. "The Austroasiatic central riverine hypothesis." *Вопросы*  
1317 *языкового родства* 16 (59) (2010): 117-134.

1318

1319 *Q4: Fourth, the claim of the method not using phylogenetic information is a bit*  
1320 *exaggerated: we know geography correlates often with language relatedness (see*  
1321 *for example here: <https://doi.org/10.1371/journal.pone.0265460>), so if geography*  
1322 *explains the tree, you cannot say you do not use the tree if you use geography as a*  
1323 *proxy for the construction of your vectors.*

1324 **Replies to Q4:**

1325 Thank you for your comments. At first, we fully agree with the reviewer that  
1326 language geography usually strongly correlates with linguistic relatedness. The  
1327 languages with closer geographic locations often possess higher relatedness due to  
1328 either vertical divergence or horizontal contact. This connection guarantees the  
1329 viability of various methods to reconstruct the dispersal pattern of languages based on  
1330 linguistic relatedness, such as the phylogeographic approach [1] and our language  
1331 velocity field estimation approach. To be specific, both the phylogeographic approach  
1332 and our approach initially delineate the diachronic evolutionary trajectories of  
1333 linguistic traits that shape the observed linguistic relatedness. Subsequently, based on  
1334 the correlation between linguistic relatedness and language geography, these  
1335 evolutionary diachronic evolutionary trajectories are transformed into language  
1336 dispersal trajectories.

1337 Secondly, we would like to emphasize that our approach necessitates the  
1338 phylogenetic information, but this phylogenetic information is not represented by the  
1339 phylogenetic tree. To be specific, phylogenetic information or linguistic relatedness is  
1340 not identical to the phylogenetic tree. It is noted that linguistic relatedness can be  
1341 shaped by both vertical divergence and horizontal contact. The phylogenetic tree is  
1342 just one of the models utilized to extract and represent the part of the linguistic  
1343 relatedness of languages solely resulting from vertical divergence [2]. In our approach,

1344 we do not utilize the phylogenetic tree but a more general approach—the PCA  
1345 algorithm to measure the linguistic relatedness through the distances among languages  
1346 in a two-dimensional PC space (PCA-based distance). In the PC space, the languages  
1347 exhibiting more linguistic relatedness resulting from either vertical divergence or  
1348 horizontal contacts are intended to be distributed closer. Accordingly, if the linguistic  
1349 relatedness is solely attributed to vertical divergence, the PCA-based distance should  
1350 be able to capture the phylogenetic information similar to that of the phylogeographic  
1351 tree.

1352 Thirdly, in our approach, we first depict the diachronic evolutionary trajectories  
1353 of linguistic traits that shape the observed linguistic relatedness within the PC space.  
1354 Based on the correlation between linguistic relatedness and language geography, we  
1355 subsequently transform these diachronic evolutionary trajectories into language  
1356 dispersal trajectories. Accordingly, we actually utilize language geography to  
1357 approximate the linguistic relatedness for constructing the velocity field. Although the  
1358 linguistic relatedness can be partially captured by the phylogenetic tree, it does not  
1359 mean that our approach adopts the topological structure of the phylogenetic tree as  
1360 input data used in our computational approach. **However, if the linguistic  
1361 relatedness can be adequately captured by the phylogenetic tree, the  
1362 phylogenetic information distilled by our approach should be similar to that  
1363 distilled by the phylogenetic tree. Under this circumstance, our approach can be  
1364 somehow regarded as utilizing the phylogenetic tree as well. In contrast, if  
1365 linguistic relatedness bears more influence from horizontal contacts, our  
1366 approach cannot be regarded as utilizing the phylogenetic tree. This conclusion  
1367 has been verified in the revised main text (*Lines 210-303*).**

## 1368 **Reference**

1369 [1] Bouckaert, Remco, et al. "Mapping the origins and expansion of the  
1370 Indo-European language family." *Science* 337.6097 (2012): 957-960.

1371 [2] François, Alexandre. "Trees, waves and linkages: Models of language  
1372 diversification." *The Routledge handbook of historical linguistics*. Routledge, 2015.  
1373 161-189.

1374

1375 *Q5: Fifth, the question of homeland has always been problematic, but if you*  
1376 *already use data by Wichmann and Rama, you should also check the much simpler*  
1377 *baseline published in Glottolog by now*  
1378 *([www.pyglottolog.readthedocs.io/en/latest/homelands.html#module-pyglottolog.homelands](http://www.pyglottolog.readthedocs.io/en/latest/homelands.html#module-pyglottolog.homelands)).*  
1379 *This method seems to work as well as the one by Wichmann and Rama, but*  
1380 *it is even simpler, so I would say there's one more baseline to be tested.*

1381 **Replies to Q5:**

1382 We highly value these insightful suggestions. Therefore, we compared our  
1383 approach—language velocity field estimation (LVF) to two other baseline approaches  
1384 suggested by the reviewer. These comparisons were achieved based on 1,000  
1385 simulated datasets and 4 empirical datasets. These two baseline approaches are  
1386 referred to as “centroid (Centr)” and “minimal distance (MD)” approaches. The Centr  
1387 approach postulates that the center of the polygon formed by the extension of current  
1388 language geographic locations should be the dispersal center. The MD approach posits  
1389 that the location of the language that exhibits the smallest average geographic distance  
1390 to the other languages should be the dispersal center.

1391 **1. Simulated validations for baseline approaches.**

1392 It is noted that the simulated datasets are generated by applying a random walk  
1393 model to the phylogenetic tree given a set of predefined dispersal centers. Accordingly,  
1394 we have already known the true dispersal centers in these simulated datasets. Utilizing  
1395 these simulated datasets provided by Wichmann et al., we first verified whether Centr  
1396 and MD approaches can effectively estimate the predefined dispersal center. By  
1397 applying Centr and MD approaches to the simulated datasets, we computed the errors  
1398 in terms of longitude and latitude respectively between the true and estimated  
1399 dispersal centers (Figure 1a to Q5). For either Centr or MD approaches, the outcomes  
1400 of the Wilcoxon rank-sum test demonstrated that the errors between true and  
1401 estimated dispersal centers were not significantly different from zero in both terms of  
1402 longitude and latitude ( $p$ -value > 0.05; Figure 1a to Q5). It indicates that there is no  
1403 difference between the dispersal centers estimated by either Centr or MD approaches  
1404 and the true ones, thus affirming the high effectiveness of both Centr and MD  
1405 approaches.

1406 **2. Simulated comparisons between LVF and baseline approaches.**

1407 After justifying the effectiveness of the Centr and MD approach, we further  
1408 compared the performance of LVF within these two approaches respectively based on  
1409 1,000 simulated datasets. It is noted that the effectiveness of the LVF had already been  
1410 verified using these simulated datasets in our previous manuscript. Therefore, we  
1411 anticipated that LVF should exhibit the same performance as the Centr and MD  
1412 approaches in simulated applications. Noting these, we calculated the differences in  
1413 terms of longitude and latitude between the dispersal centers estimated by LVF and  
1414 these two approaches respectively (Figure 1b to Q5). According to the Wilcoxon  
1415 rank-sum test, we indeed found no significant differences in terms of longitude and  
1416 latitude between the dispersal center estimated by LVF and those estimated by these  
1417 two approaches respectively ( $p$ -value > 0.05; Figure 1b to Q5). This result confirms  
1418 that LVF exhibits identical performance as these two baseline approaches in simulated  
1419 applications.

### 1420 **3. Empirical comparisons between LVF and baseline approaches.**

1421 We proceeded to compare the performance between LVF and baseline approaches  
1422 in empirical applications. However, we found significant differences between the  
1423 dispersal centers estimated by LVF and those estimated by these two baseline  
1424 approaches (Figure 2 to Q5). Moreover, it appeared that the estimated dispersal  
1425 centers of Centr and MD approaches seemed to lack support from the genetic and  
1426 archeological evidence and were well less aligned with linguistics' conventional  
1427 intuitions. In contrast, the estimated results of LVF can be more favored by the  
1428 archaeological and genetic evidence, implying the better performance of LVF in  
1429 empirical applications as compared to Centr and MD approaches.

### 1430 **4. The possible reasons why two baseline approaches are useful in simulated 1431 validations but not in empirical applications.**

1432 Given the distinctions between the theoretical foundations of LVF and these two  
1433 baseline approaches (i.e., Centr and MD), it is not surprising to see such obvious  
1434 differences between the estimated result of LVF and those of the two baseline  
1435 approaches in empirical applications. The LVF reconstructs language dispersal by  
1436 transforming the diachronic evolutionary trajectories of linguistic traits that shape the  
1437 observed linguistic relatedness into the language dispersal trajectories. In contrast,  
1438 these two baseline approaches rely solely on the geographic locations of language

1439 samples, making their estimated results more susceptible to the biased geographic  
1440 distribution of language samples. Nevertheless, these two baseline approaches exhibit  
1441 high effectiveness in simulated validations probably owing to that simulated datasets  
1442 are generated by the random walk model. The random walk model simulates that  
1443 languages diffuse evenly as an outward radiating pattern from a given center.  
1444 Accordingly, such simulation may display two characteristics:

1445 (a) The simulated language samples tend to be evenly distributed around this  
1446 given dispersal center in the geographic space.

1447 (b) Due to (a), the simulated language samples located closer to the center of  
1448 their geographic distribution would have a shorter average geographic  
1449 distance to other languages.

1450 Due to these two characteristics, both Centr and MD approaches can exhibit good  
1451 performance in identifying the language dispersal center within simulated applications.  
1452 Nevertheless, the empirical language samples may be not geographically distributed  
1453 around the dispersal center uniformly, due to numerous reasons such as sampling bias,  
1454 environmental constraints (i.e., mountain, desert, and river), and population  
1455 movement (carrying languages out of the dispersal center) [1-2]. Consequently, Centr  
1456 and MD approaches solely relying on the geographic locations of language samples  
1457 may not perform as effectively in empirical applications.

## 1458 **Reference**

1459 [1] Grollemund, Rebecca, et al. "Bantu expansion shows that habitat alters the route  
1460 and pace of human dispersals." *Proceedings of the National Academy of Sciences*  
1461 112.43 (2015): 13296-13301.

1462 [2] Neureiter, Nico, et al. "Can Bayesian phylogeography reconstruct migrations and  
1463 expansions in linguistic evolution?" *Royal Society open science* 8.1 (2021): 201079.

1464

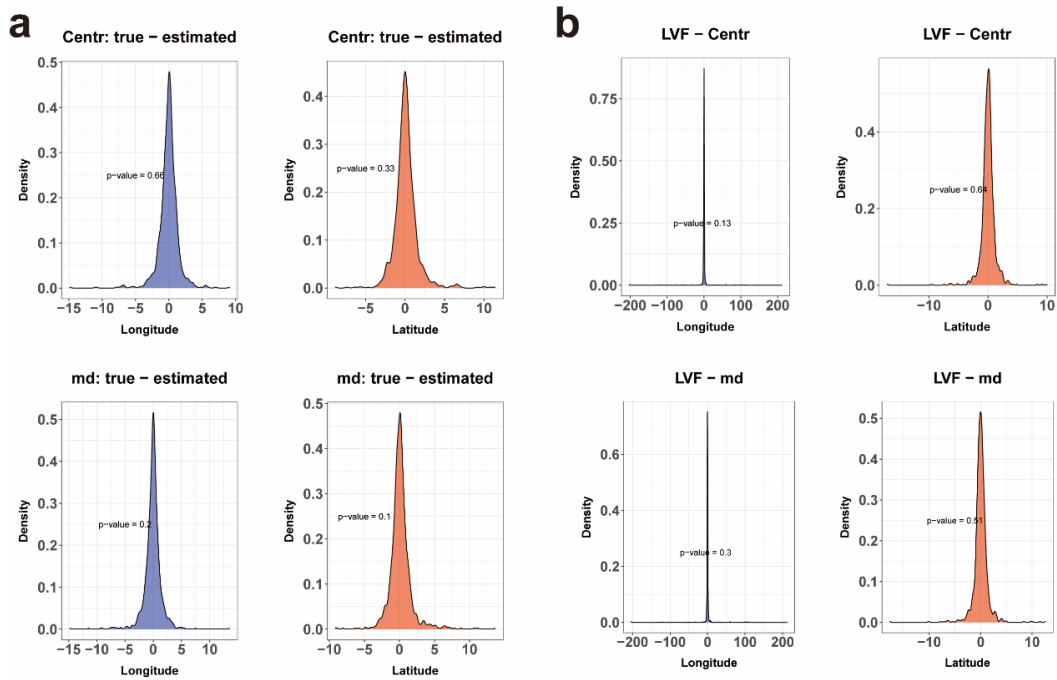

1465

1466 **Figure 1 to Q5. Simulated validations of two baseline approaches and simulated**  
 1467 **comparisons between LVF and baseline approaches.** a) density plot shows the  
 1468 distribution of the error between the true and estimated dispersal center in terms of  
 1469 longitude and latitude. The p-value is calculated based on the Wilcoxon rank-sum test.  
 1470 b) density plot shows the distribution of the difference between the dispersal center  
 1471 estimated by LVF and baseline approaches in terms of longitude and latitude. The  
 1472 p-value is calculated based on the Wilcoxon rank-sum test.

1473

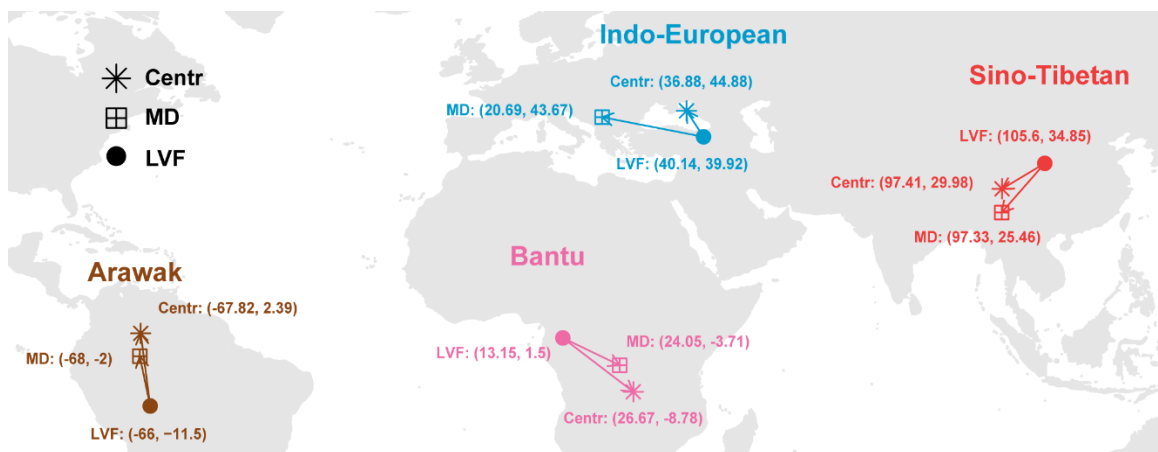

1474

1475 **Figure 2 to Q5. The dispersal centers estimated by LVF, Centr, and MD**

1476 **approaches for four language families and groups.**

1477

1478 *Q6: And when speaking of testing: why restrict your study to four datasets (or*  
1479 *seven), if there are many more available in terms of phylogenies now, which are all*  
1480 *with nicely coded cognate sets in standardized data formats (see e.g.,*  
1481 *<https://doi.org/10.1038/s41597-022-01432-0> for a very large collection of*  
1482 *standardized data)? It seems the data has been cherry-picked to yield good results.*  
1483 *Taking ten of the datasets in the Lexibank collection should not be difficult and*  
1484 *would tell us much more clearly where we are with this new method.*

1485 **Replies to Q6:**

1486 We express our sincere gratitude to the reviewer for introducing the *Lexibank*  
1487 which is an important lexical dataset to us. The *Lexibank* covers nearly 3,000  
1488 language samples of around 300 language families and groups around the world. This  
1489 lexical dataset could provide comprehensive insights into the origins and dispersals of  
1490 various language families and groups around the world.

1491 The primary objective of our paper is to examine the alignment of language  
1492 dispersal, demic diffusion, and Neolithic/Agricultural cultures spread in human  
1493 prehistory. Therefore, the language cases utilized in our paper are expected to fulfill  
1494 the following criteria. Firstly, the language case should have a possible association  
1495 with the origin and development of ancient agriculture. Secondly, the demic or  
1496 cultural diffusions in the specific geographic areas where these languages are spoken  
1497 should be supported by corresponding genetic or archaeological evidence. Thirdly, the  
1498 language cases are preferably renowned cases with sufficient language samples that  
1499 have been rigorously investigated in previous phylogenetic research. More  
1500 importantly, the lexical items in these language cases should have been carefully  
1501 collated and well coded into cognate sets that meet the standard of computational  
1502 linguistics. With these criteria, we hope that the empirical cases can better serve our  
1503 paper's primary objective and make our estimated results more acceptable to the  
1504 broad range of audiences.

1505 According to these criteria, four language cases which are Indo-European,  
1506 Sino-Tibetan, Bantu, and Arawak languages are included in our study. These



1507 languages are hypothesized to be closely associated with agricultural development in  
1508 this area [1-2]. Moreover, they are widely spoken in their corresponding geographic  
1509 area and have all been rigorously studied by former phylogenetic studies [3-6]. More  
1510 importantly, the lexical items utilized in these four cases have undergone careful  
1511 selections and validations. In the geographic areas where the languages are spoken,  
1512 the demic diffusion and cultural spread have been delineated based on sufficient  
1513 genetic or archaeological evidence [1-2].

1514 Following these criteria, within the *Lexibank*, we filtered out the language cases  
1515 with a sample size lower than 20, ultimately leaving us with 17 language cases. These  
1516 cases are *Afro-Asiatic*, *Arawak*, *Atlantic-Congo*, *Austroasiatic*, *Austronesian*,  
1517 *Hmong-Mien*, *Indo-European*, *Nuclear Trans New Guinea*, *Pama-Nyungan*,  
1518 *Quechuan*, *Sino-Tibetan*, *Dravidian*, *Tucanoan*, *Tupian*, *Turkic*, *Uralic*, and  
1519 *Uto-Aztecan languages*. Among them, the *Indo-European*, *Sino-Tibetan*, *Austroasiatic*,  
1520 and *Arawak languages* have been incorporated into our study and *Afro-Asiatic* and  
1521 *Pama-Nyungan languages* are the hunter-gatherer languages. Additionally, there lack  
1522 of sufficient Austronesian language samples within their suggested homeland in China.  
1523 Therefore, we ultimately selected 10 language cases: *Uralic*, *Trans-New-Guinea*,  
1524 *Quechuan*, *Turkic*, *Tukanoan*, *Tupian*, *Uto-Aztecan*, *Hmong-Mien*, *Atlantic-Congo*,  
1525 and *Dravidian languages*.

1526 However, either the evolution or dispersals of these 10 language cases has not  
1527 been well investigated and remains highly controversial in the previous computational  
1528 linguistic studies. Therefore, investigating their dispersal patterns seems worthy of  
1529 being pursued as separate research endeavors for publication. Moreover,  
1530 corresponding genetic and archaeological evidence is also hard to find to support the  
1531 demic diffusion and cultural spread within the area where these languages are spoken.  
1532 Given these constraints, we hold the view that including these 10 language cases in  
1533 our study may not align with our primary research objective and make the narrative of  
1534 our manuscript less clear. Therefore, we still hope to retain the original well-attested  
1535 four language cases (i.e., Indo-European, Sino-Tibetan, Bantu, and Arawak languages)  
1536 in our manuscript.

1537 Although we have decided not to include these language cases in our revision, we  
1538 still have applied our approach—language velocity field estimation (LVF) to these  
1539 language cases to infer their dispersal patterns. In this reply, we present the results

1540 regarding the dispersal patterns of these 10 language cases to the reviewer below  
1541 (Table 1 to Q6 and Figure 1 to Q6). The datasets of these 10 language cases and the R  
1542 codes for replicating the results of these 10 language cases can be downloaded from  
1543 [https://github.com/Stan-Sizhe-Yang/Language-velocity-field-estimation-for-language](https://github.com/Stan-Sizhe-Yang/Language-velocity-field-estimation-for-language-dispersal-pattern-inference)  
1544 [-dispersal-pattern-inference](https://github.com/Stan-Sizhe-Yang/Language-velocity-field-estimation-for-language-dispersal-pattern-inference).

### 1545 **1. Uralic languages**

1546 Uralic languages are widely distributed across northeastern Europe and Northern  
1547 Asia. The lexical dataset of Uralic languages was sourced from Honkola et al. (2013)  
1548 [7]. The LVF inferred that the dispersal center of Uralic languages is situated in the  
1549 steppe region in the southeast of the Ural Mountains (Lon: 64.6, Lat: 54.9) (Figure 1b  
1550 to Q6). From this dispersal center, Uralic languages dispersed westward crossing the  
1551 Ural Mountains into Europe and eastward into the Far East region. It advocates the  
1552 “east of the southern Urals origin hypothesis” of Uralic languages, which is proposed  
1553 according to the historical contact between Uralic and Indo-Iranian languages [8].

### 1554 **2. Trans-New-Guinea languages**

1555 Trans–New Guinea languages are widely spoken on the island of New Guinea  
1556 and neighboring islands. The Trans–New Guinea lexical dataset was obtained from  
1557 Greenhill (2015) [9]. The LVF depicted the dispersal of Trans-New-Guinea languages  
1558 originating from the center in central Papua New Guinea (Lon: 144.3, Lat: -6.4),  
1559 which used to be the ancient agricultural homeland of New Guinea island (Figure 1c  
1560 to Q6). This result is compatible with the conclusion drawn from recent linguistic  
1561 studies and corroborated by the archaeological evidence [10-11]. It suggests that the  
1562 Trans–New Guinea dispersal could be closely associated with the development and  
1563 spread of agriculture across the New Guinea island.

### 1564 **3. Quechuan languages**

1565 The Quechuan languages are widely spoken by the native peoples in South  
1566 America. We collected the Quechuan lexical dataset from the Blum et al. (2023) [12].  
1567 The dispersal center of Quechuan languages (Lon: -75.5, Lat: -9.8) was inferred more  
1568 adjacent to the Lima near the Andes which is the ancient agricultural homeland in  
1569 South America [13] (Figure 1d to Q6). From this dispersal center, Quechuan  
1570 languages spread northward and southward along the Andes. These results are

1571 compatible with the evidence drawn from the Quechua dialectology [14].

#### 1572 **4. Turkic languages**

1573 Turkic languages span the vast expanse of the Eurasian continent, stretching from  
1574 the northwest of China to the west of Eastern Europe, and from the north of Siberia to  
1575 the south of Iran. The precise homeland of Turkic languages remains a subject of  
1576 intense debate. The expansive geographic area encompassing the Transcaspian steppe  
1577 to the far northeastern reaches of Manchuria in Asia is regarded as a potential  
1578 homeland for these languages [15]. We applied LVF to the Turkic lexical dataset  
1579 structured by Savelyev et al. (2020) [16]. The spatial reconstruction showed that  
1580 Turkic languages spread westward into Europe and eastward into the Far East region  
1581 from the dispersal center inferred in Kazakhstan near Mongolia and Southern Siberia  
1582 (Lon: 77.1, Lat: 54.4) (Figure 1e to Q6). This result can be advocated by the genetic  
1583 evidence that suggests the potential origin of Turkic-speaking populations in the area  
1584 near Mongolia and Southern Siberia [15]. However, we noticed that the Turkic  
1585 language samples manifested an exceedingly sparse geographic distribution across the  
1586 Eurasian continent. Such sparse geographic distribution may introduce more  
1587 uncertainties into the LVF estimation. Therefore, collecting more Turkic language  
1588 samples may enable LVF to yield a more precise depiction of the Turkic dispersal  
1589 pattern.

#### 1590 **5. Tukanoan languages**

1591 Tukanoan, also referred to as Tucanoan, is a language family of Colombia, Brazil,  
1592 Ecuador, and Peru in South America. We applied the LVF to the Tucanoan dataset  
1593 derived from Chacon et al. (2017) [17]. The dispersal center of Tucanoan languages  
1594 was inferred in the region of the Japurá River (Lon: -70.0, Lat: -0.9) (Figure 1f to Q6).  
1595 The location of this dispersal center is compatible with the conclusion drawn from  
1596 previous linguistic studies and can be advocated by the archaeological evidence  
1597 [17-18].

#### 1598 **6. Tupian languages**

1599 The Tupian language family is one of the largest linguistic groups in South  
1600 America. The dataset of the Tupian language was sourced from Galucio et al. (2015).  
1601 We applied LVF to this dataset for inferring the dispersal pattern of Tupian languages.

1602 The result showed that Tupian languages dispersed from the center located in the  
1603 regions of Rondônia in Brazil within the Madeira River basin (Lon: -62.3, Lat: -11.6)  
1604 across South America. This result is compatible with previous linguistic studies [19]  
1605 (Figure 1g to Q6).

## 1606 **7. Uto-Aztecan languages**

1607 The Uto-Aztecan languages are the mother tongue of native Americans, which are  
1608 primarily spoken in the Great Basin region, including states such as California,  
1609 Nevada, and Arizona, and extending into Mexico. The Uto-Aztecan lexical dataset  
1610 was derived from the Greenhill (2023) [20]. The LVF identified the dispersal center of  
1611 Uto-Aztecan languages in Southern Arizona (Lon: -113.5, Lat: 33.9) near the border  
1612 between Arizona and Mexico (Figure 1h to Q6). This location was compatible with  
1613 the one inferred by the phylogeographic approach as reported in Greenhill (2023)  
1614 (Lon: -116.7, Lat: 34.8). From this dispersal center, the Uto-Aztecan languages spread  
1615 southeastward and northwestward along the coastline, and northeast into South  
1616 America. These results favor the “Northern origin hypothesis” supported by the  
1617 reconstruction of flora and fauna terms [20-21]. This hypothesis postulates that  
1618 Uto-Aztecan languages originated in the area between Southern California’s Mojave  
1619 Desert and the Sonoran and Chihuahuan desert regions of Arizona and northern  
1620 Mexico.

## 1621 **8. Hmong-Mien languages**

1622 The Hmong-Mien languages are primarily spoken by various ethnic groups in  
1623 southern China, northern Vietnam, Laos, Thailand, and Myanmar. Linguistic  
1624 reconstructions focusing on ancient terminology related to flora and fauna have  
1625 suggested that the origins of Hmong-Mien languages might be found in the provinces  
1626 to the south of the Yangzi River [22]. In our investigation, we applied the LVF to the  
1627 Hmong-Mien lexical dataset derived from Chen (2013) [23] (Figure 1i to Q6). The  
1628 results consistently indicated that the dispersal center of Hmong-Mien languages is  
1629 indeed located within Guizhou province, situated to the south of the Yangzi River  
1630 (Longitude: 107.7, Latitude: 27.0).

## 1631 **9. Atlantic-Congo languages**

1632 The Atlantic-Congo languages, which constitute a prominent subgroup of the

1633 Niger-Congo language family, have a significant presence across the African  
 1634 continent. The Atlantic-Congo lexical dataset was collected from the public dataset  
 1635 compiled by Koelle (1853) [24]. Utilizing the LVF, we traced the dispersal of  
 1636 Atlantic-Congo languages initiating from Nigeria near Cameroon (Lon: 5.6, Lat: 6.4),  
 1637 which used to be the ancient agricultural homeland in Africa [25] (Figure 1j to Q6). It  
 1638 suggests that the Atlantic-Congo dispersal could be associated with agricultural  
 1639 expansion in Africa.

## 1640 10. Dravidian languages

1641 The Dravidian languages are widely scattered across southern and central India  
 1642 and surrounding countries. The dispersal of Dravidian languages has been a  
 1643 long-standing debate. The genetic evidence indicates the potential origin of Dravidian  
 1644 languages in the Indus Valley, with subsequent southward and eastward expansion  
 1645 across the Indian subcontinent [26]. The linguistic evidence drawn from the term  
 1646 reconstruction suggests that Dravidian languages might originate somewhere in South  
 1647 India (i.e., Peninsular India) [26]. Archaeological evidence yields the connection  
 1648 between the origin of the Dravidian language and the development of the Southern  
 1649 Neolithic complex in Karnataka and Andhra Pradesh [27, 28]. Based on the Dravidian  
 1650 lexical dataset derived from Kolipakam et al. (2018) [29], LVF inferred the dispersal  
 1651 of Dravidian languages originating from the center located in the range of Andhra  
 1652 Pradesh (Lon: 80.6, Lat: 13.6) (Figure 1k to Q6). This result can be supported by the  
 1653 archaeological evidence that implies the close association between Dravidian  
 1654 dispersal and Neolithic culture spread in India.

## 1655 Table and Figure

1656 **Table 1 to Q6.** The coordinates of dispersal centers inferred by LVF for ten language  
 1657 families and groups.

| Language         | Longitude | Latitude |
|------------------|-----------|----------|
| Uralic           | 64.6      | 54.9     |
| Trans-New-Guinea | 144.3     | -6.4     |
| Quechuan         | -75.5     | -9.8     |
| Turkic           | 77.1      | 54.4     |
| Tukanoan         | -70.0     | -0.9     |

|                |        |       |
|----------------|--------|-------|
| Tupian         | -62.3  | -11.6 |
| Uto-Aztecan    | -113.5 | 33.9  |
| Hmong-Mien     | 107.7  | 27.0  |
| Atlantic-Congo | 5.6    | 6.4   |
| Dravidian      | 80.6   | 13.6  |

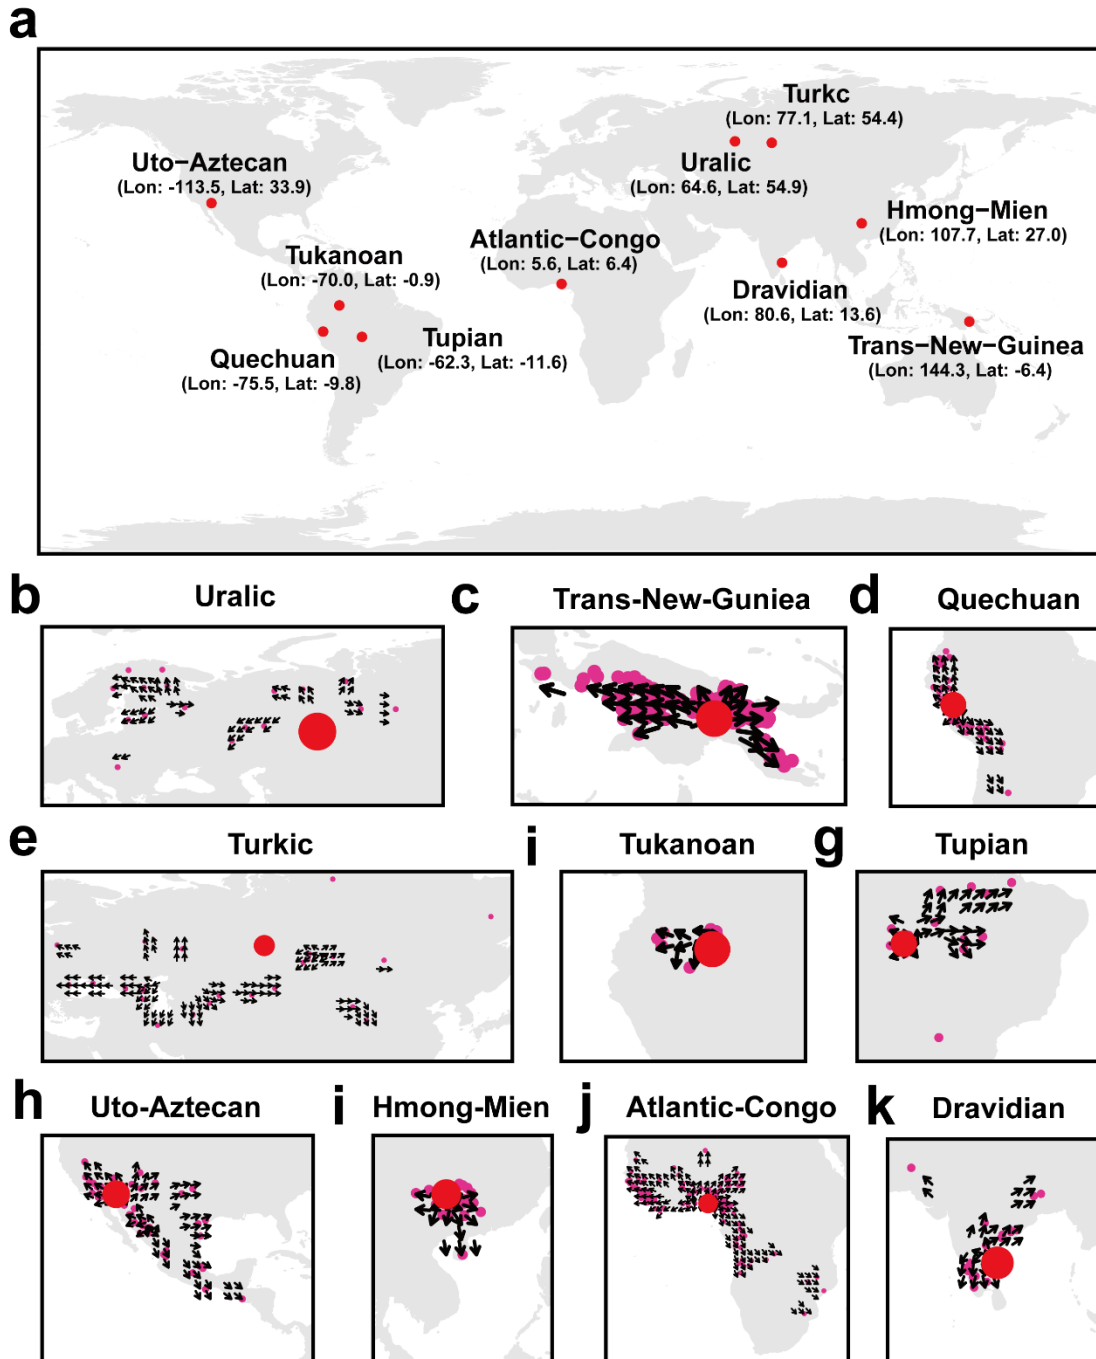

1658

1659 **Figure 1 to Q6.** The Language velocity fields reveal the dispersal patterns of 10

1660 language families and groups worldwide. The red dot denotes the dispersal center  
1661 inferred by LVF. The pink dot signifies the language sample. The black arrow  
1662 represents the grid-smoothed velocity vector.

### 1663 **Reference**

1664 [1] Diamond, Jared, and Peter Bellwood. "Farmers and their languages: the first  
1665 expansions." *science* 300.5619 (2003): 597-603.

1666 [2] Skoglund, Pontus, and Iain Mathieson. "Ancient genomics of modern humans:  
1667 the first decade." *Annual review of genomics and human genetics* 19 (2018): 381-404.

1668 [3] Bouckaert, Remco, et al. "Mapping the origins and expansion of the  
1669 Indo-European language family." *Science* 337.6097 (2012): 957-960.

1670 [4] Zhang, Menghan, et al. "Phylogenetic evidence for Sino-Tibetan origin in  
1671 northern China in the Late Neolithic." *Nature* 569.7754 (2019): 112-115.

1672 [5] Grollemund, Rebecca, et al. "Bantu expansion shows that habitat alters the route  
1673 and pace of human dispersals." *Proceedings of the National Academy of Sciences*  
1674 112.43 (2015): 13296-13301.

1675 [6] Walker, Robert S., and Lincoln A. Ribeiro. "Bayesian phylogeography of the  
1676 Arawak expansion in lowland South America." *Proceedings of the Royal Society B:  
1677 Biological Sciences* 278.1718 (2011): 2562-2567.

1678 [7] Honkola, Terhi, et al. "Cultural and climatic changes shape the evolutionary  
1679 history of the Uralic languages." *Journal of Evolutionary Biology* 26.6 (2013):  
1680 1244-1253.

1681 [8] Nichols, Johanna. "The origin and dispersal of Uralic: Distributional typological  
1682 view." *Annual Review of Linguistics* 7 (2021): 351-369.

1683 [9] Greenhill, Simon J. "TransNewGuinea. org: An online database of New Guinea  
1684 languages." *PLoS One* 10.10 (2015): e0141563.

1685 [10]Diamond, Jared, and Peter Bellwood. "Farmers and their languages: the first  
1686 expansions." *science* 300.5619 (2003): 597-603.

- 1687 [11]Schapper, Antoinette. "Farming and the Trans-New Guinea family." *Language*  
1688 dispersal beyond farming (2017): 155-181.
- 1689 [12]Blum, Frederic, et al. "A phylolinguistic classification of the Quechua language  
1690 family." (2023).
- 1691 [13]Diamond, Jared, and Peter Bellwood. "Farmers and their languages: the first  
1692 expansions." *science* 300.5619 (2003): 597-603.
- 1693 [14]King, Kendall A., and Nancy H. Hornberger. "Quechua as a lingua franca."  
1694 *Annual Review of Applied Linguistics* 26 (2006): 177-196.
- 1695 [15]Yunusbayev, Bayazit, et al. "The genetic legacy of the expansion of  
1696 Turkic-speaking nomads across Eurasia." *PLoS Genetics* 11.4 (2015): e1005068.
- 1697 [16]Savelyev, Alexander, and Martine Robbeets. "Bayesian phylolinguistics infers the  
1698 internal structure and the time-depth of the Turkic language family." *Journal of*  
1699 *Language Evolution* 5.1 (2020): 39-53.
- 1700 [17]Chacon, Thiago. "Arawakan and Tukanoan contacts in Northwest Amazonia  
1701 prehistory." *PAPIA Rev. Bras. Estud. Crioulos E Similares* 27 (2017): 237-265.
- 1702 [18]Chacon, Thiago. "On Proto-Languages and Archaeological Cultures: pre-history  
1703 and material culture in the Tukanoan Family." *Revista Brasileira de Linguística*  
1704 *Antropológica* 5.1 (2013): 217-245.
- 1705 [19]Galucio, Ana Vilacy, et al. "Genealogical relations and lexical distances within  
1706 the Tupian linguistic family." *Boletim do Museu Paraense Emílio Goeldi. Ciências*  
1707 *Humanas* 10 (2015): 229-274.
- 1708 [20]Greenhill, Simon J., et al. "A recent northern origin for the Uto-Aztecan family."  
1709 *Language* (2023).
- 1710 [21]Campbell, Lyle. "What drives linguistic diversification and language spread."  
1711 *Examining the farming/language dispersal hypothesis* (2002): 49-63.
- 1712 [22]Ratliff, Martha. *Hmong-Mien language history*. Pacific Linguistics, Research  
1713 School of Pacific and Asian Studies, The Australian National University, 2010.



1714 [23]Qiguang, Chen. "Miao-Yao yuwen [Miao and Yao Language]." Beijing:  
1715 Zhongyang Minzu Daxue Chubanshe (2013).

1716 [24]Koelle, Sigismund Wilhelm. "Polyglotta Africana; or a comparative vocabulary  
1717 of nearly three hundred words and phrases in more than one hundred distinct African  
1718 languages." (No Title) (1853).

1719 [25]Diamond, Jared, and Peter Bellwood. "Farmers and their languages: the first  
1720 expansions." science 300.5619 (2003): 597-603.

1721 [26] Narasimhan, Vagheesh M., et al. "The formation of human populations in South  
1722 and Central Asia." Science 365.6457 (2019): eaat7487.

1723 [27]Southworth, Franklin. Linguistic archaeology of south Asia. Routledge, 2004.

1724 [28]Kolipakam, Vishnupriya, et al. "A Bayesian phylogenetic study of the Dravidian  
1725 language family." Royal Society open science 5.3 (2018): 171504.

1726 [29]Kolipakam, Vishnupriya, et al. "DravLex: A Dravidian lexical database:(Version  
1727 v1. 0.0)[Data set]." (2018).

1728

1729 *Q7: Sixth, the method has the rather infelicitous name "language velocity field*  
1730 *estimation", and I could not find any explanation why the authors chose to call it*  
1731 *like that, since the name is very confusion and difficult to parse, and it does not*  
1732 *really help to understand what the method could be about. I think in general it*  
1733 *would be useful to 1) change the name to something that explains the method in a*  
1734 *better way (dynamic trait vectors? I am not sure) and 2) to explain the method in*  
1735 *much, much more detail. For this, figures would be needed that show how vectors*  
1736 *for some of the traits are estimated, and the authors would need to also check the*  
1737 *resulting vectors on an individual basis in order to see if they make sense.*

1738 **Replies to Q7:**

1739 We are sorry for not being clear about the rationale of our approach. After careful  
1740 consideration, we have decided to retain the original name "language velocity field"  
1741 of our approach. Because this name can intuitively reflect the characteristics of our

1742 approach. Following the valuable *suggestion 2*) offered by the reviewer, we have  
1743 redrawn our original schematic diagrams for the rationale and calculation procedure  
1744 of our approach with greater detail and accuracy as shown in [Figure 1](#) of the revised  
1745 main text. For the convenience of the reviewer, we attach [Figure 1](#) of the revised main  
1746 text to the end of this reply as [Figure 1 to Q7](#). Additionally, we have added more  
1747 detailed descriptions of our approach into the *Lines 109-151* of the revised main text.  
1748 Considering the word limit in the main text, more detailed explanations of our  
1749 approach can be found in [Supplementary Note 1](#). Here, we provide a concise  
1750 explanation of the rationale of our approach.

1751 **The inspiration for proposing language velocity field estimation.** The velocity  
1752 field can be visualized as a collection of arrows with given magnitudes and directions  
1753 estimated by a specific dynamic model, which demonstrates the directions of the  
1754 spatiotemporal changes of individuals [1]. The directions of the vectors in the velocity  
1755 field compose sets of continuously changing paths that visualize the dynamic  
1756 trajectories of natural phenomena such as atmospheric circulation [2] (e.g., water  
1757 vapor transport), and cell differentiation [3] (e.g., RNA transcription). Furthermore,  
1758 this approach has now extended to infer the trajectories of the spatial-temporal  
1759 changes of social phenomena such as demic diffusion [4] (e.g., human mobility), and  
1760 cultural spread [5] (e.g., Neolithic culture propagation). Given that humans are the  
1761 carriers of languages which are also the carriers of cultures, we believe that the  
1762 velocity field could also contribute to the inference of the language dispersal.  
1763 Accordingly, our approach is designed to establish a language velocity field on the  
1764 geographic map to depict language dispersal patterns. By visualizing the language  
1765 velocity field on the geographic map, the directions of velocity vectors can intuitively  
1766 show how and from where (i.e., dispersal trajectory and center) these languages have  
1767 dispersed into their current locations.

1768 **Our approach shares the same theoretical foundation as the phylogeographic**  
1769 **approach but with different implementation strategies.** As the most prevailing  
1770 approach, the phylogeographic approach implements two major steps to infer  
1771 language dispersal from the diachronic evolution of linguistic traits [6]. The first is to  
1772 establish a phylogenetic tree to depict the diachronic evolutionary trajectories of  
1773 linguistic traits that shape the observed linguistic relatedness ([Figure 2 to Q7](#)). The  
1774 second is to project the phylogenetic tree into the geographic space to transform these  
1775 diachronic evolutionary trajectories into dispersal trajectories, based on the correlation

1776 between linguistic relatedness and geography (Figure 2 to Q7). Akin to the  
1777 phylogeographic approach, our approach also infers language dispersal through the  
1778 diachronic evolution of linguistic traits with two major steps (Figure 2 to Q7). The  
1779 first is to establish a velocity field to depict the diachronic evolutionary trajectories of  
1780 linguistic traits that shape the observed linguistic relatedness. The second is to project  
1781 this velocity field into the geographic space to outline the language dispersal  
1782 trajectories. These two steps are described as follows.

1783 **The velocity field in PC space delineates diachronic evolutionary trajectories**  
1784 **of linguistic traits that shape the observed linguistic relatedness.** Our approach  
1785 conducts the PCA-based distance rather than a phylogenetic tree to represent  
1786 linguistic relatedness. To be specific, we employ the PCA algorithm to extract two  
1787 optimal principal components (i.e., PC1 and PC2) from the linguistic traits. According  
1788 to PC1 and PC2, we represent the linguistic relatedness among language samples as  
1789 the distances among them in the PC space that can be shaped by both divergence and  
1790 contact (Figure 1b to Q7). In parallel, we use a dynamic model, similar to the  
1791 widely-used covarion model for linguistic trait evolution [7-9], to reconstruct the past  
1792 states of linguistic traits for each language sample (Figure 1d1 to Q7). Given the  
1793 differences between the past and current trait states of each language sample, we can  
1794 obtain a velocity vector that reflects the direction of diachronic changes in its  
1795 linguistic traits (Figure 1d2 to Q7). In other words, the velocity vector depicts how the  
1796 linguistic traits in each language sample evolve into their current states. Finally, we  
1797 project this language velocity field into the PC space formed by the aforementioned  
1798 two principal components (Figure 1e to Q7). For convenience, we can interpret the  
1799 language velocity field in the PC space as the collection of arrows connecting the past  
1800 and current states of linguistic traits within language samples in the PC space (Figure  
1801 1e1 to Q7). Accordingly, the past and current states of linguistic traits within language  
1802 samples can simultaneously be visualized in the PC space. Each arrow connecting the  
1803 past and current states of linguistic traits for each language sample outlines the  
1804 diachronic change of the linguistic traits in this language. Therefore, the arrows in the  
1805 PC space compose a set of trajectories to depict the diachronic evolution of the  
1806 linguistic traits that shape the observed linguistic relatedness (Figure 1e2 to Q7).

1807 **Transforming the diachronic evolutionary trajectories of the linguistic traits**  
1808 **into language dispersal trajectories.** We project the language velocity field from the  
1809 PC space to the geographic space based on the correlation between linguistic

1810 relatedness and geography [6-8] (Figure 1f to Q7). To achieve this, we utilize the  
1811 kernel projection approach proposed by La Manno et al. [3] to project the language  
1812 velocity field from the PC space into the two-dimensional geographic space. The  
1813 rationale behind this kernel projection is to estimate the velocity vectors of language  
1814 samples in the geographic space, ensuring that their correlation with language  
1815 distributions in the PC space can be best preserved within the geographic space  
1816 (Figure 1f1 to Q7). This projection is similar to the projection of the phylogenetic tree  
1817 to the geographic space in the phylogeographic approach. Accordingly, the directions  
1818 of these vectors compose a set of trajectories that depict from where the observed  
1819 language samples have diffused into their current locations (Figure 1f2 to Q7). We  
1820 hope these contents supplemented by Figure 1 to Q7 can provide the reviewer with a  
1821 clearer understanding of our approach.

1822       **Validation of velocity field.** The direction of the ultimate velocity vector of a  
1823 language sample we estimated within the geographic space manifests the direction  
1824 from where this language sample diffuses into its current locations. However, it is  
1825 important to highlight that the power of any spatial reconstruction method is  
1826 inevitably affected by the heterogeneity of the spatial distribution of samples.  
1827 Therefore, each estimated velocity vector cannot signify exactly the diffusion  
1828 direction of each language sample. However, our approach aims to reconstruct the  
1829 general dispersal pattern of the entire language family or group rather than the exact  
1830 dispersal direction of just one language sample. Moreover, relying solely on a single  
1831 velocity vector is insufficient to ascertain the dispersal pattern of the entire language  
1832 family. And, the overall dispersal pattern of the entire language family is deduced by  
1833 the continuously changing trajectories formed by a collection of velocity vectors.  
1834 Consequently, it appears less critical to validate the effectiveness of a solitary velocity  
1835 vector on the individual level. Accordingly, we consider that the effectiveness of our  
1836 approach should be validated on the global level of the language velocity field rather  
1837 than the individual level of a single language velocity vector. Under this circumstance,  
1838 simulated validations of our approach have confirmed its ability to reconstruct  
1839 accurate language dispersal patterns based on the language velocity field in our  
1840 previous manuscript. Therefore, with these simulated validations, we believe that the  
1841 velocity vectors can indeed contribute to reconstructing the language dispersal  
1842 pattern.

1843 **Reference**

- 1844 [1] Galbis, Antonio, and Manuel Maestre. Vector analysis versus vector calculus.  
1845 Springer Science & Business Media, 2012.
- 1846 [2] Sohn, Byung-Ju, et al. "Regulation of atmospheric circulation controlling the  
1847 tropical Pacific precipitation change in response to CO2 increases." *Nature*  
1848 *communications* 10.1 (2019): 1108.
- 1849 [3] La Manno, Gioele, et al. "RNA velocity of single cells." *Nature* 560.7719 (2018):  
1850 494-498.
- 1851 [4] Mazzoli, Mattia, et al. "Field theory for recurrent mobility." *Nature*  
1852 *communications* 10.1 (2019): 3895.
- 1853 [5] Fort, Joaquim. "Demic and cultural diffusion propagated the Neolithic transition  
1854 across different regions of Europe." *Journal of the Royal Society interface* 12.106  
1855 (2015): 20150166.
- 1856 [6] Bouckaert, Remco, et al. "Mapping the origins and expansion of the  
1857 Indo-European language family." *Science* 337.6097 (2012): 957-960.
- 1858 [7] Yang, Ziheng. "Maximum-likelihood estimation of phylogeny from DNA  
1859 sequences when substitution rates differ over sites." *Molecular biology and evolution*  
1860 10.6 (1993): 1396-1401.
- 1861 [8] Penny, David, et al. "Mathematical elegance with biochemical realism: the  
1862 covarion model of molecular evolution." *Journal of Molecular Evolution* 53 (2001):  
1863 711-723.
- 1864 [9] Zhang, Menghan, et al. "Phylogenetic evidence for Sino-Tibetan origin in  
1865 northern China in the Late Neolithic." *Nature* 569.7754 (2019): 112-115.

1866 **Figure**

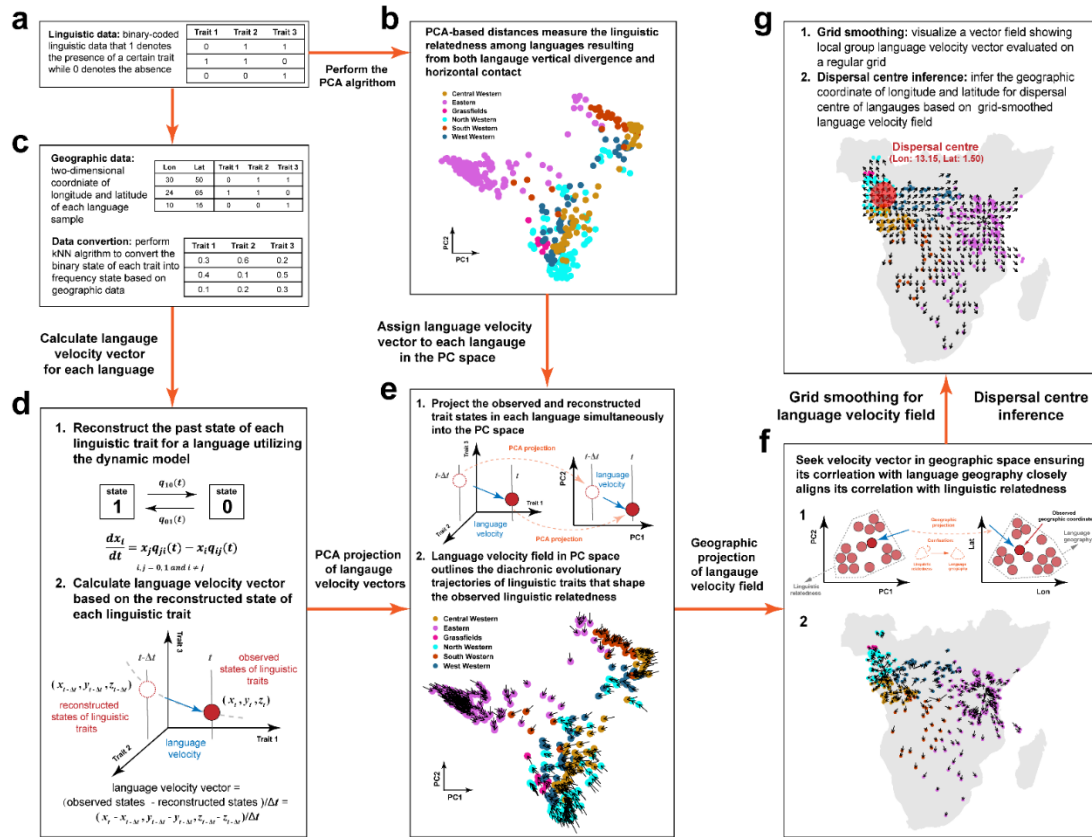

1867

1868 **Figure 1 to Q7. Schematic diagram of language velocity field estimation (LVF)**  
 1869 **for inferring the dispersal trajectories and centers of languages.** The  
 1870 computational procedures of the LVF comprise two major steps. Subfigures (a) to (e)  
 1871 illustrate the first step which is to estimate a velocity field on the PC space to outline  
 1872 the diachronic evolutionary trajectories of linguistic traits that shape the observed  
 1873 linguistic relatedness. Subfigures (f) to (g) illustrate the second step, which is to  
 1874 project the velocity field from PC space into geographic space. Within the velocity  
 1875 field in geographic space, the directions of the velocity vectors compose a set of  
 1876 continuously changing trajectories that delineate from where these languages diffuse  
 1877 to their current locations. These procedures are exemplified using the Bantu language  
 1878 family. Comprehensive insights into the underlying principles and computational  
 1879 steps can be found in the [Materials and Methods](#) section, as well as [Supplementary](#)  
 1880 [Note 1](#).

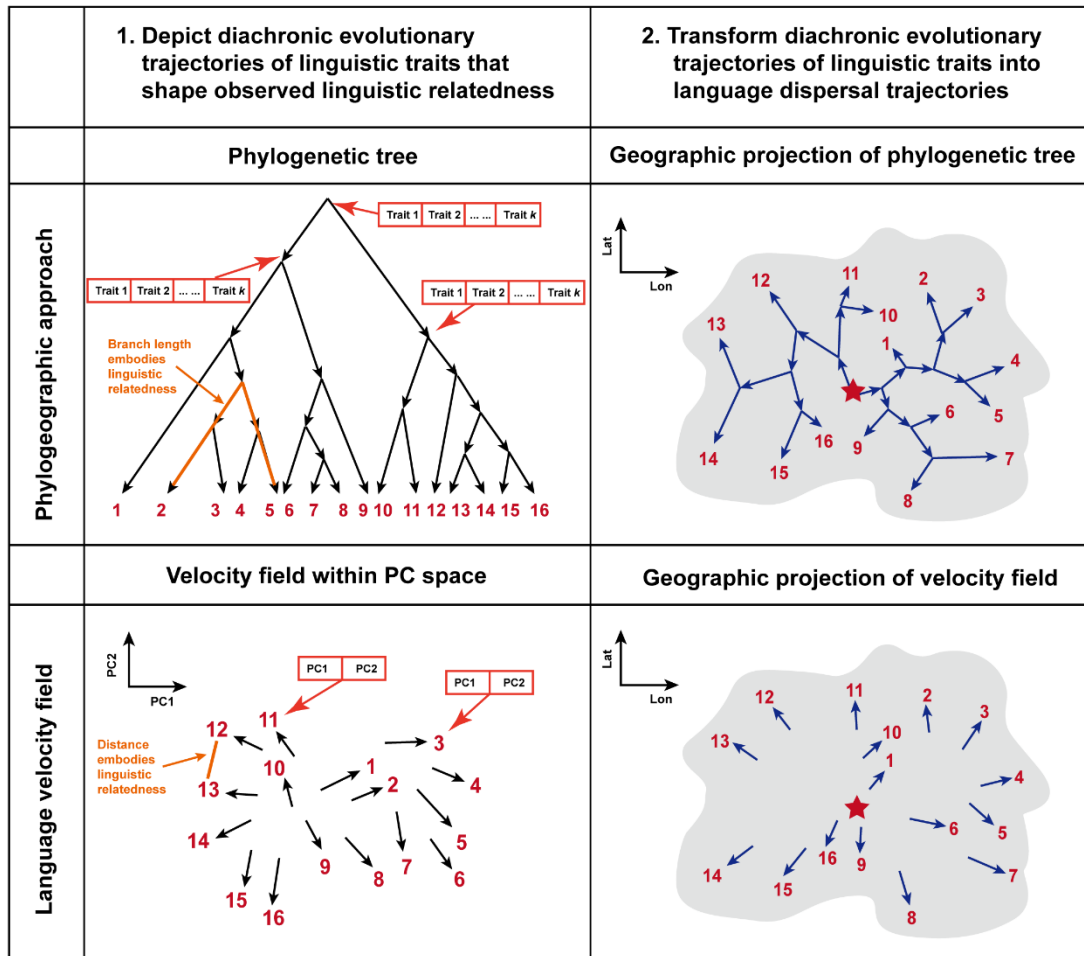

1881

1882 **Figure 2 to Q7. Language velocity field estimation (LVF) shares the same**  
1883 **foundation as the phylogeographic approach but with different implementation**  
1884 **strategies.** Both LVF and phylogeographic approach entails two major steps to infer  
1885 language dispersal pattern. The first is to depict the diachronic evolutionary  
1886 trajectories of linguistic traits that shape the observed linguistic relatedness. The  
1887 second is to transform these diachronic evolutionary trajectories of linguistic traits  
1888 into language dispersal trajectories. In the phylogenetic tree, each language is  
1889 determined by  $k$  linguistic traits. In the velocity field within PC space, each language  
1890 is determined by PC1 and PC2 which are rearranged from the  $k$  linguistic traits  
1891 through the PCA algorithm. The red number denotes a language. The black arrow  
1892 signifies the evolutionary direction of linguistic traits in a language. The blue arrow  
1893 represents the dispersal direction of a language. The red star denotes the estimated  
1894 dispersal center.

1895 *Q8: Seventh, the authors praise their method for not needing trees, but at the same*  
1896 *time, they do not tell the readers why trees are so useful: they tell us various*  
1897 *scenarios of character evolution in a very transparent way, in which we have*  
1898 *scenario and can plot how the trait evolved. Of course, this is not always done, but*  
1899 *they should tell the readers to which the method they propose allows us to get some*  
1900 *insights into the black box, since a simple black box, even if it works, is not*  
1901 *satisfying from a scientific viewpoint, and we talk about scientific approaches here.*

1902 **Replies to Q8:**

1903 We really appreciate the reviewer for raising this crucial point. To improve the  
1904 credibility and interpretability of our approach, we have added more comprehensive  
1905 descriptions and explanations of our approach to the revised main text (*Lines*  
1906 *109-151*). Here, we offer a brief answer.

1907 **1. The phylogenetic tree visualizes the diachronic evolutionary trajectories of**  
1908 **the linguistic traits that shape the observed linguistic relatedness.**

1909 The phylogeographic approach infers the language dispersal through the  
1910 diachronic evolution of linguistic traits. As the reviewer mentioned, the phylogenetic  
1911 tree plays an important role in the phylogeographic approach. To be specific, the  
1912 phylogenetic tree is a power representation for the diachronic evolutionary trajectories  
1913 of the linguistic traits that shape the observed linguistic relatedness ([Figure 1 to Q8](#)).  
1914 This representation relies on the branching pattern within the phylogenetic tree. This  
1915 branching pattern visualizes the diachronic evolution of linguistic traits in languages  
1916 after diverging from their ancestors [1]. The shorter branch linking two languages  
1917 indicates fewer diachronic changes occurring between their traits, resulting in a higher  
1918 linguistic relatedness between them. This phylogenetic tree can be projected into the  
1919 geographic space based on the correlation between linguistic relatedness and language  
1920 geography ([Figure 1 to Q8](#)) [1-2]. To be specific, each branch within the phylogenetic  
1921 tree, that has been projected into the geographic space, is regarded as a segment of the  
1922 dispersal trajectories ([Figure 1 to Q8](#)). With this projection, the evolutionary  
1923 trajectories of linguistic traits can thus be transformed into language dispersal  
1924 trajectories.

1925 **2. The theoretical foundation and interpretability of our approach.**



1926           Akin to the phylogeographic approach, our approach also aims to reconstruct the  
1927 language dispersal pattern through the diachronic evolution of linguistic traits. Our  
1928 approach and phylogeographic approach actually share the same theoretical  
1929 foundation but with different implementation strategies (Figure 1 to Q8).

1930           **The velocity field in PC space depicts the diachronic evolutionary**  
1931 **trajectories of the linguistic traits that shape the observed linguistic relatedness.**

1932 Our approach represents the linguistic relatedness of observed language samples  
1933 through the distances among them in a two-dimensional PC space instead of a  
1934 phylogenetic tree. This PC space is determined by two optimal axes (PC1 and PC2)  
1935 estimated through the PCA algorithm (Figure 2b to Q7). In this PC space, the  
1936 language samples with higher relatedness, due to both divergence and contact, would  
1937 be distributed closer. In parallel, we reconstruct the past states of linguistic traits for  
1938 each language sample using a dynamic model that is derived from the widely-used  
1939 covarion model for linguistic trait evolution [3-5] (Figure 2d to Q7). Subsequently, we  
1940 also project these past trait states onto the PC space. Accordingly, both past and  
1941 current states of linguistic traits for each language sample can be visualized in the PC  
1942 space. By computing the differences between the current and past trait states divided  
1943 by the reconstruction time for each language sample in the PC space, we can derive a  
1944 velocity vector representing the diachronic changes of its linguistic traits (Figure 2e1  
1945 to Q7). In other words, this velocity vector illustrates how the linguistic traits in this  
1946 language sample evolve into their current states. Accordingly, these velocity vectors  
1947 consist of a velocity field in the PC space. And, this velocity field outlines a set of  
1948 trajectories that represent the diachronic change of linguistic traits that shape the  
1949 observed linguistic relatedness (Figure 2e2 to Q7).

1950           **Transforming the diachronic evolutionary trajectories of the linguistic traits**  
1951 **into language dispersal trajectories.**

1952 Subsequently, we adopt the kernel projection proposed by La Manno et al. to map the velocity field from PC space into the  
1953 geographic space. This projection seeks the velocity vector in the geographic space  
1954 ensuring that its correlation with language geography aligns closely with its  
1955 correlation with linguistic relatedness (Figure 2f1 to Q7). This projection is similar to  
1956 the projection of each branch within the phylogenetic into the geographic space as a  
1957 segment of dispersal trajectories (Figure 1 to Q8). With the kernel projection, the  
1958 velocity vectors compose a set of trajectories in geographic space that depict from  
1959 where the observed language samples have diffused into their current locations

1960 (Figure 2f2 to Q7).

1961 **The relationship between the phylogeographic approach and our approach.**

1962 It is noted that if linguistic relatedness can be adequately demonstrated by the  
1963 phylogenetic tree, our approach and phylogenetic tree can capture similar linguistic  
1964 relatedness. Accordingly, our approach and phylogeographic approach would exhibit  
1965 the same performance. In contrast, if linguistic relatedness cannot be adequately  
1966 demonstrated by the phylogenetic tree, our approach can capture additional  
1967 phylogenetic information from linguistic relatedness due to horizontal contacts as  
1968 compared to the phylogeographic approach. Accordingly, our approach may derive a  
1969 more reliable result than the phylogeographic approach. In summary, our approach  
1970 can be seen as an extension of the phylogeographic approach by relaxing its tree  
1971 topology assumption of the phylogeographic approach. This conclusion has been  
1972 verified in the revised main text (*Lines 210-303*). Therefore, our approach does not  
1973 stand as the opposite of the phylogeographic approach but as its extension.

1974 **Figure**



1975

1976 **Figure 1 to Q8. Language velocity field estimation (LVF) shares the same**  
 1977 **foundation as the phylogeographic approach but with different implementation**  
 1978 **strategies.** Both LVF and phylogeographic approach entails two major steps to infer  
 1979 language dispersal pattern. The first is to depict the diachronic evolutionary  
 1980 trajectories of linguistic traits that shape the observed linguistic relatedness. The  
 1981 second is to transform these diachronic evolutionary trajectories of linguistic traits  
 1982 into language dispersal trajectories. In the phylogenetic tree, each language is  
 1983 determined by  $k$  linguistic traits. In the velocity field within PC space, each language  
 1984 is determined by PC1 and PC2 which are rearranged from the  $k$  linguistic traits  
 1985 through the PCA algorithm. The red number denotes a language. The black arrow  
 1986 signifies the evolutionary direction of linguistic traits in a language. The blue arrow  
 1987 represents the dispersal direction of a language. The red star denotes the estimated  
 1988 dispersal center.

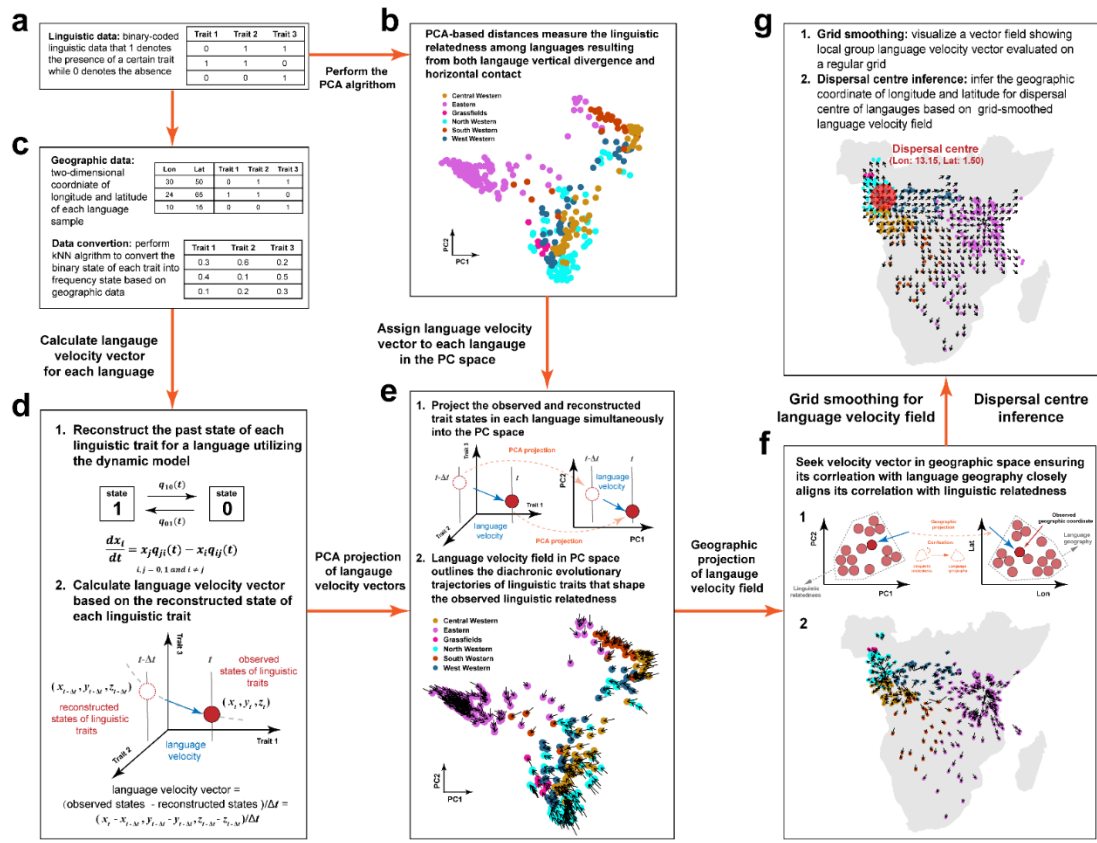

1989

1990 **Figure 2 to Q8. Schematic diagram of language velocity field estimation (LVF)**  
 1991 **for inferring the dispersal trajectories and centers of languages.** The  
 1992 computational procedures of the LVF comprise two major steps. Subfigures (a) to (e)  
 1993 illustrate the first step which is to estimate a velocity field on the PC space to outline  
 1994 the diachronic evolutionary trajectories of linguistic traits that shape the observed  
 1995 linguistic relatedness. Subfigures (f) to (g) illustrate the second step, which is to  
 1996 project the velocity field from PC space into geographic space. Within the velocity  
 1997 field in geographic space, the directions of the velocity vectors compose a set of  
 1998 continuously changing trajectories that delineate from where these languages diffuse  
 1999 to their current locations. These procedures are exemplified using the Bantu language  
 2000 family. Comprehensive insights into the underlying principles and computational  
 2001 steps can be found in the [Materials and Methods](#) section, as well as [Supplementary](#)  
 2002 [Note 1](#).

2003 **Reference**

2004 [1] Bouckaert, Remco, et al. "Mapping the origins and expansion of the  
 2005 Indo-European language family." *Science* 337.6097 (2012): 957-960.

2006 [2] Grollemund, Rebecca, et al. "Bantu expansion shows that habitat alters the route  
2007 and pace of human dispersals." Proceedings of the National Academy of Sciences  
2008 112.43 (2015): 13296-13301.

2009 [3] Yang, Ziheng. "Maximum-likelihood estimation of phylogeny from DNA  
2010 sequences when substitution rates differ over sites." Molecular biology and evolution  
2011 10.6 (1993): 1396-1401.

2012 [4] Penny, David, et al. "Mathematical elegance with biochemical realism: the  
2013 covarion model of molecular evolution." Journal of Molecular Evolution 53 (2001):  
2014 711-723.

2015 [5] Zhang, Menghan, et al. "Phylogenetic evidence for Sino-Tibetan origin in  
2016 northern China in the Late Neolithic." Nature 569.7754 (2019): 112-115.

2017

2018 *Q9: Eighth, and final point, the paper is not nice to read, the authors should check*  
2019 *their wordings, which are often hard to follow, at times with flaws in grammar, and*  
2020 *it would really profit from a complete overhaul and a thorough checking by a proof*  
2021 *reader.*

2022 **Replies to Q9:**

2023 We really appreciate the reviewer for pointing this out. In the revised main text,  
2024 we have corrected all the typos and grammar flaws. And, we have simplified the long  
2025 and wording sentences into the concise and shorten ones. Moreover, we have engaged  
2026 the AJE language editing service to thoroughly polish the language of the revised  
2027 manuscript (ID: Q2K9ZRSF). We hope that our revised manuscript can be more  
2028 readable to native English speakers.

2029

2030 *Q10: Due to all these reservations, I recommend that the paper be rejected, but I*  
2031 *emphasize that it is not for poor quality, but for lack of fit. I look forward to see a*  
2032 *new methods paper emerging from this, in which the authors work hard to share a*  
2033 *useful new approach with the scientific world that they also evaluate rigorously*  
2034 *against existing approaches. I am convinced they have the potential to turn their*  
2035 *paper into such a study, and I am also very confident that this would be the right*  
2036 *way to go, instead of trying to sell this as some study with new insights, or a study*  
2037 *with a method that beats all existing approaches, since this is obviously not the*  
2038 *case.*

2039 **Replies to Q10:**

2040 We appreciate these comments and are very grateful for the reviewer's  
2041 encouragement. According to the reviewer's suggestions, we have carefully rewritten  
2042 the contents about the validations of the approach and the comparison with other  
2043 approaches. Moreover, we have added a more detailed description of the rationale of  
2044 our approach. As supplementary, we have also redrawn the schematic diagram to  
2045 more visually demonstrate the rationale and procedure of our approach. Most  
2046 importantly, we have restructured the logical flow of our paper, with a focus on  
2047 sharing a useful and rigorously validated approach with the science community.

Reviewers' Comments:

Reviewer #1:

Remarks to the Author:

The authors answered all my concerns and I do not have further major comments.

Minor changes that need to be addressed:

- new figure 1: typo in panel b, "languauge"
- Panel c: cordiniate, algrithm
- Panel f: unclear sentence + writings in orange are too small and cannot be read

Reviewer #2:

Remarks to the Author:

I think this is perhaps the fourth time I have reviewed this article. As I stated before, I am neither statistician nor linguist, but I detect that the authors have replied to all previous comments by the referees to the maximum extent possible. So I am happy to see the article go to press.

I am impressed by the authors' claims for their efficacy of their "language velocity field" method (at least for the 4 examples they consider), based on PCA rather than phylogenetic "family tree" distances between language subgroups, even if my understanding of all the algebraic formulae that they present is rather limited. The main point for me is that the conclusions of the authors with respect to the homelands of 4 language families that they consider are virtually identical to those I offer in my two recent books *The Five-Million-Year Odyssey* (Princeton 2022) and *First Farmers* (second edition, Wiley Blackwell 2023).

So I wish the authors the best of luck with publication and scholarly reception of their views.

Reviewer #3:

Remarks to the Author:

Dear Authors. I have now read all your comments and also had a look at the revised paper and I decided that I should no longer stand in the way, preventing your study to be published. What I would like to ask you, however, is one final thing: For transparency and for replicability, please make sure to make a RELEASE of your code on GitHub and please download this release and submit it to an open independent repository that guarantees long-term archival, such as, for example, Zenodo or Open Science Framework. Here, you will receive a DOI and you should add this DOI to your paper, so we can check the very same code you used to produce the final results that you share with us. Since GitHub itself is owned by Microsoft and Microsoft could shut it down any time they please (think of what happened to Twitter), we need to have the data and the code in public hands. This should not be too hard to do for you, so I hope you'll account for it quickly, and I will recommend the publication of your study, once these changes have been made.

As I will ask for my reports to be published along with my name, I emphasize that the fact that I agree with the publication of this study does not mean that I explicitly express full confidence in its results. It rather means that I feel that it is the best if this study is at this point shared with a larger public that can then discuss then findings in due course and may well find that they have some flaws which were overseen during the review process. I myself am not able to find these flaws by now, nor am I able to assess the quality of the study in full, due to the specifics of my own background. But I am confident that this study provides an interesting contribution to the field and therefore deserves to be published and discussed by more qualified colleagues than myself.

## Response Letter to Reviewers

### Replies to Reviewer 1:

*Q1: The authors answered all my concerns and I do not have further major comments. Minor changes that need to be addressed: new figure 1: typo in panel b, "langauge"*

### Replies to Q1:

We sincerely appreciate your careful examination. We have corrected this typo in the revised manuscript.

*Q2: Panel c: cordiniate, algorithm*

### Replies to Q2

These typos have been corrected in the revised manuscript.

*Q3: Panel f: unclear sentence + writings in orange are too small and cannot be read*

### Replies to Q3

We sincerely appreciate your comments. We have enlarged the texts in orange to ensure that they can be read clearly by the readers.

### Replies to Reviewer 2:

*Q1: I think this is perhaps the fourth time I have reviewed this article. As I stated before, I am neither statistician nor linguist, but I detect that the authors have replied to all previous comments by the referees to the maximum extent possible. So I am happy to see the article go to press. I am impressed by the authors' claims for their efficacy of their "language velocity field" method (at least for the 4 examples they consider), based on PCA rather than phylogenetic "family tree" distances between language subgroups, even if my understanding of all the algebraic formulae that they*



*present is rather limited. The main point for me is that the conclusions of the authors with respect to the homelands of 4 language families that they consider are virtually identical to those I offer in my two recent books *The Five-Million-Year Odyssey* (Princeton 2022) and *First Farmers* (second edition, Wiley Blackwell 2023). So I wish the authors the best of luck with publication and scholarly reception of their views.*

## **Replies to Q1**

We sincerely appreciate your support and affirmation all the time. Moreover, we are also very grateful for your recommendation of your two excellent books to us. We believe that the evidence mentioned within these books can greatly enhance the credibility of our conclusions.

## **Replies to Reviewer 3:**

*Q1: Dear Authors. I have now read all your comments and also had a look at the revised paper and I decided that I should no longer stand in the way, preventing your study to be published. What I would like to ask you, however, is one final thing: For transparency and for replicability, please make sure to make a **RELEASE** of your code on GitHub and please download this release and submit it to an open independent repository that guarantees long-term archival, such as, for example, Zenodo or Open Science Framework. Here, you will receive a DOI and you should add this DOI to your paper, so we can check the very same code you used to produce the final results that you share with us. Since GitHub itself is owned by Microsoft and Microsoft could shut it down any time they please (think of what happened to Twitter), we need to have the data and the code in public hands. This should not be too hard to do for you, so I hope you'll account for it quickly, and I will recommend the publication of your study, once these changes have been made.*

## **Replies to Q1**

We are deeply grateful for your support and encouragement. Your valuable suggestions and comments have greatly improved the quality of our manuscript and the transparency and replicability of our approach. Following your suggestions, we have also uploaded our R package and codes to the Zendo (<https://doi.org/10.5281/zenodo.10223872>).

*Q2: As I will ask for my reports to be published along with my name, I emphasize that the fact that I agree with the publication of this study does not mean that I explicitly express full confidence in its results. It rather means that I feel that it is the best if this study is at this point shared with a larger public that can then discuss then findings in due course and may well find that they have some flaws which were overseen during the review process. I myself am not able to find these flaws by now, nor am I able to assess the quality of the study in full, due to the specifics of my own background. But I am confident that this study provides an interesting contribution to the field and therefore deserves to be published and discussed by more qualified colleagues than myself.*

### **Replies to Q2**

We sincerely appreciate your support and encouragement. Moreover, we are very grateful that you are willing to publish your reports with your name. We believe that your reports can provoke new thoughts among the readers.
